# Supplementary material for: A radical-mediated 1,3,4-trifunctionalization cascade of 1,3-enynes with sulfinates andtert-butyl nitrite: facile access to sulfonyl isoxazoles
Source: Royal Society of Chemistry journal article supplement (doi:10.1039/d0cc01659d), 2020-01-01
Supplement: d0cc01659d1.pdf [file d0cc01659d1.pdf]

## Supplementary Information

# Radical-Mediated 1,3,4-Trifunctionalization Cascades of 1,3-Enynes with Sulfinates and *tert*-Butyl Nitrite: Facile Access to Sulfonyl Isoxazoles

Xin Yue, Ming Hu,\* Xingyi He, Shuang Wu,\* and Jin-Heng Li\*

*Key Laboratory of Jiangxi Province for Persistent Pollutants Control and Resources  
Recycle, Nanchang Hangkong University, Nanchang 330063, China, State Key  
Laboratory of Chemo/Biosensing and Chemometrics, Hunan University, Changsha  
410082, China, and State Key Laboratory of Applied Organic Chemistry, Lanzhou  
University, Lanzhou 730000, China*

E-mail: [huming0731@163.com](mailto:huming0731@163.com), [shuangwuchem@163.com](mailto:shuangwuchem@163.com) and [jhli@hnu.edu.cn](mailto:jhli@hnu.edu.cn)

### List of Contents

- (A) Typical experimental procedures
- (B) Analytical data
- (C) Spectra
- (D) Reference

## (A) Typical experimental procedures

### (a) General Procedures for the radical-mediated 1,3,4-trifunctionalization

#### cascades of 1,3-enynes with sulfinates and *tert*-butyl nitrite:

To a Schlenk tube (25 mL), enynes **1** (0.2 mmol), Sodium sulfinates **2** (2 equiv), *t*-BuONO (3 equiv), InBr<sub>3</sub> (10 mol%), and MeCN (2 mL) were added. Then the mixture was stirred at 60 °C (oil bath temperature) under argon atmosphere (1 atm) for 8 h until complete consumption of starting material as monitored by TLC and/or GC-MS analysis. After the reaction was finished, the reaction solution was extracted with EtOAc (3×10 mL). The combined organic layer was dried with Na<sub>2</sub>SO<sub>4</sub>, filtered and concentrated in vacuum. The resulting residue was purified by silica gel column chromatography (hexane/ethyl acetate) to afford the desired products **3**.

### (b) Screening of optimal reaction conditions

Table S1. Screening of optimal reaction conditions<sup>[a]</sup>

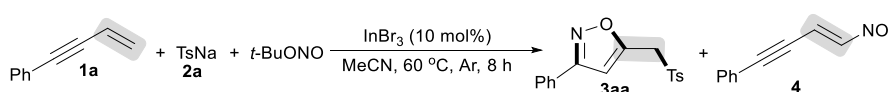

| Entry | Variation from the standard conditions            | Isolated yield (%) |
|-------|---------------------------------------------------|--------------------|
| 1     | none                                              | 78                 |
| 2     | without InBr <sub>3</sub>                         | 38                 |
| 3     | InBr <sub>3</sub> (5 mol%)                        | 53                 |
| 4     | InBr <sub>3</sub> (20 mol%)                       | 79                 |
| 5     | InCl <sub>3</sub> instead of InBr <sub>3</sub>    | 63                 |
| 6     | In(OAc) <sub>3</sub> instead of InBr <sub>3</sub> | 59                 |
| 7     | In(OTf) <sub>3</sub> instead of InBr <sub>3</sub> | trace              |
| 8     | CuBr <sub>2</sub> instead of InBr <sub>3</sub>    | trace              |

|                 |                                                |       |
|-----------------|------------------------------------------------|-------|
| 9               | FeCl <sub>3</sub> instead of InBr <sub>3</sub> | 12    |
| 10              | DCE instead of MeCN                            | 27    |
| 11              | THF instead of MeCN                            | trace |
| 12              | DMF instead of MeCN                            | 8     |
| 13              | toluene instead of MeCN                        | 22    |
| 14              | TsNa (1.5 equiv)                               | 51    |
| 15              | TsNa (3 equiv)                                 | 80    |
| 16              | TBN (2 equiv)                                  | 62    |
| 17              | TBN (4 equiv)                                  | 78    |
| 18              | at 40 °C                                       | 51    |
| 19              | at 80 °C                                       | 76    |
| 20              | under O <sub>2</sub> atmosphere (1 atm)        | trace |
| 21 <sup>b</sup> | none                                           | 77    |

<sup>a</sup> Reaction conditions: **1a** (0.2 mmol), **2a** (2 equiv), *t*-BuONO (TBN; 3 equiv), InBr<sub>3</sub> (10 mol%), MeCN (2 mL), 60 °C, argon and 8 h. Side-product **4** was determined by GC-MS analysis. <sup>b</sup> **1a** (1 mmol) in MeCN (4 mL) and 12 h.

### (c) Figure S1. The side-product data

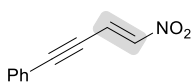

Molecular Weight: 173

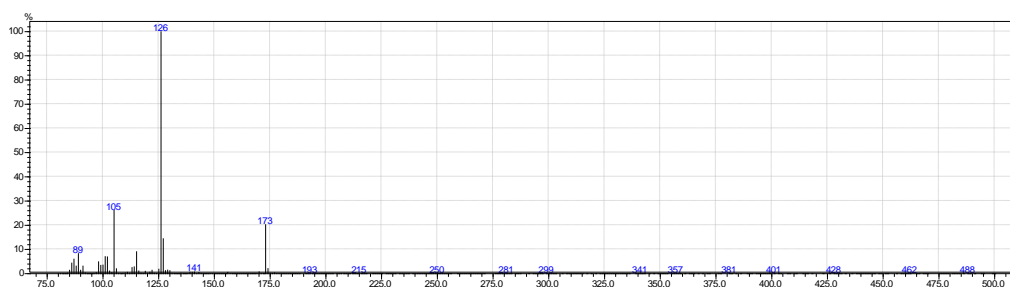

#### [MS Spectrum]

# of Peaks 331

Raw Spectrum 9.925 (scan : 1186)

Background 9.860 (scan : 1173)

Base Peak m/z 126.05 (Inten : 249,293)

Event# 1

m/z Absolute Intensity Relative Intensity

|       |     |      |       |     |      |       |      |      |
|-------|-----|------|-------|-----|------|-------|------|------|
| 80.00 | 253 | 0.10 | 82.00 | 100 | 0.04 | 84.00 | 592  | 0.24 |
| 81.00 | 290 | 0.12 | 83.00 | 181 | 0.07 | 85.00 | 3589 | 1.44 |

|        |       |       |        |        |        |               |              |              |
|--------|-------|-------|--------|--------|--------|---------------|--------------|--------------|
| 86.00  | 10891 | 4.37  | 126.05 | 249293 | 100.00 | 166.00        | 77           | 0.03         |
| 87.00  | 15091 | 6.05  | 127.05 | 36008  | 14.44  | 167.00        | 53           | 0.02         |
| 88.00  | 7853  | 3.15  | 128.05 | 3146   | 1.26   | 168.00        | 97           | 0.04         |
| 89.00  | 20652 | 8.28  | 129.00 | 3736   | 1.50   | 169.05        | 292          | 0.12         |
| 90.00  | 3642  | 1.46  | 130.00 | 3128   | 1.25   | 170.05        | 1972         | 0.79         |
| 91.00  | 7968  | 3.20  | 131.00 | 402    | 0.16   | 171.00        | 239          | 0.10         |
| 92.05  | 929   | 0.37  | 132.00 | 172    | 0.07   | 172.00        | 151          | 0.06         |
| 93.00  | 148   | 0.06  | 133.05 | 181    | 0.07   | <b>173.00</b> | <b>50492</b> | <b>20.25</b> |
| 94.05  | 178   | 0.07  | 134.00 | 216    | 0.09   | 174.00        | 5358         | 2.15         |
| 95.00  | 102   | 0.04  | 135.00 | 671    | 0.27   | 175.00        | 539          | 0.22         |
| 96.00  | 414   | 0.17  | 136.00 | 107    | 0.04   | 176.00        | 382          | 0.15         |
| 97.00  | 1273  | 0.51  | 137.00 | 168    | 0.07   | 177.00        | 980          | 0.39         |
| 98.00  | 12355 | 4.96  | 138.05 | 324    | 0.13   | 178.00        | 243          | 0.10         |
| 99.00  | 8606  | 3.45  | 139.00 | 1674   | 0.67   | 179.00        | 280          | 0.11         |
| 100.00 | 8952  | 3.59  | 140.05 | 1536   | 0.62   | 180.00        | 30           | 0.01         |
| 101.00 | 17726 | 7.11  | 141.05 | 1752   | 0.70   | 181.00        | 112          | 0.04         |
| 102.00 | 17390 | 6.98  | 142.05 | 343    | 0.14   | 182.00        | 19           | 0.01         |
| 103.00 | 2893  | 1.16  | 143.05 | 1431   | 0.57   | 183.00        | 85           | 0.03         |
| 104.00 | 1260  | 0.51  | 144.05 | 410    | 0.16   | 184.00        | 58           | 0.02         |
| 105.00 | 65139 | 26.13 | 145.00 | 173    | 0.07   | 185.00        | 27           | 0.01         |
| 106.00 | 5244  | 2.10  | 146.00 | 98     | 0.04   | 186.00        | 21           | 0.01         |
| 107.00 | 418   | 0.17  | 147.00 | 163    | 0.07   | 187.00        | 21           | 0.01         |
| 108.00 | 125   | 0.05  | 148.05 | 240    | 0.10   | 188.00        | 35           | 0.01         |
| 109.00 | 491   | 0.20  | 149.05 | 308    | 0.12   | 191.00        | 39           | 0.02         |
| 110.00 | 962   | 0.39  | 150.00 | 64     | 0.03   | 192.00        | 35           | 0.01         |
| 111.00 | 1481  | 0.59  | 151.00 | 94     | 0.04   | 192.95        | 258          | 0.10         |
| 112.00 | 576   | 0.23  | 152.00 | 56     | 0.02   | 193.90        | 64           | 0.03         |
| 113.00 | 6376  | 2.56  | 153.00 | 102    | 0.04   | 194.90        | 78           | 0.03         |
| 114.05 | 7166  | 2.87  | 154.00 | 99     | 0.04   | 195.90        | 34           | 0.01         |
| 115.05 | 22745 | 9.12  | 155.00 | 104    | 0.04   | 196.90        | 43           | 0.02         |
| 116.05 | 2847  | 1.14  | 156.00 | 1514   | 0.61   | 197.90        | 27           | 0.01         |
| 117.05 | 625   | 0.25  | 157.05 | 370    | 0.15   | 198.90        | 11           | 0.00         |
| 118.05 | 355   | 0.14  | 158.00 | 60     | 0.02   | 199.90        | 10           | 0.00         |
| 119.00 | 2523  | 1.01  | 159.00 | 152    | 0.06   | 200.90        | 35           | 0.01         |
| 120.00 | 437   | 0.18  | 160.00 | 23     | 0.01   | 201.90        | 5            | 0.00         |
| 121.05 | 1621  | 0.65  | 161.00 | 45     | 0.02   | 202.90        | 55           | 0.02         |
| 122.00 | 3693  | 1.48  | 162.00 | 60     | 0.02   | 204.90        | 3            | 0.00         |
| 123.00 | 594   | 0.24  | 163.00 | 43     | 0.02   | 205.90        | 24           | 0.01         |
| 124.00 | 234   | 0.09  | 164.00 | 5      | 0.00   | 207.00        | 335          | 0.13         |
| 125.05 | 4688  | 1.88  | 165.00 | 53     | 0.02   | 208.00        | 93           | 0.04         |

## (B) Analytical data

### 3-Phenyl-5-(tosylmethyl)isoxazole (3aa):

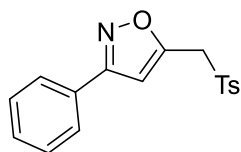

Yield: 48.8 mg (78%); yellow solid, mp 181.2-182.9 °C  
(uncorrected); <sup>1</sup>H NMR (500 MHz, CDCl<sub>3</sub>) δ: 7.78-7.76 (m, 2H),

7.66 (d, *J* = 8.0 Hz, 2H), 7.49-7.47 (m, 3H), 7.30 (d, *J* = 8.0 Hz, 2H), 6.80 (s, 1H),  
4.48 (s, 2H), 2.42 (s, 3H); <sup>13</sup>C NMR (125 MHz, CDCl<sub>3</sub>) δ: 170.9, 154.2, 145.4, 134.5,  
130.6, 129.9, 129.0, 128.4, 126.8, 125.8, 100.3, 53.7, 21.7; IR (KBr, cm<sup>-1</sup>) *v*: 1589,  
1445, 1312, 1288, 1160, 768; HRMS *m/z* (ESI) calcd for C<sub>17</sub>H<sub>16</sub>NO<sub>3</sub>S ([M+H]<sup>+</sup>)  
314.0845, found 314.0838.

### 3-(*p*-Tolyl)-5-(tosylmethyl)isoxazole (3ba):

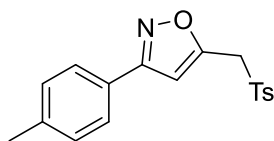

Yield: 43.2 mg (66%); yellow solid, mp 184.1-185.6 °C  
(uncorrected); <sup>1</sup>H NMR (500 MHz, CDCl<sub>3</sub>) δ: 7.65 (d, *J* = 8.0

Hz, 4H), 7.28 (t, *J* = 7.5 Hz, 4H), 6.73 (s, 1H), 4.47 (s, 2H), 2.41 (s, 6H); <sup>13</sup>C NMR  
(125 MHz, CDCl<sub>3</sub>) δ: 171.0, 154.1, 145.3, 140.9, 134.5, 129.8, 129.7, 128.3, 125.7,  
124.1, 99.7, 53.7, 21.7, 21.5; IR (KBr, cm<sup>-1</sup>) *v*: 1591, 1435, 1312, 1282, 1155, 767;  
HRMS *m/z* (ESI) calcd for C<sub>18</sub>H<sub>18</sub>NO<sub>3</sub>S ([M+H]<sup>+</sup>) 328.1002, found 328.1014.

### 3-(4-Methoxyphenyl)-5-(tosylmethyl)isoxazole (3ca):

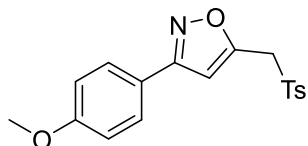

Yield: 41.2 mg (60%); yellow solid, mp 197.4-198.8 °C  
(uncorrected); <sup>1</sup>H NMR (500 MHz, CDCl<sub>3</sub>) δ: 7.71 (d, *J* =

9.0 Hz, 2H), 7.66 (d, *J* = 8.5 Hz, 2H), 7.30 (d, *J* = 8.0 Hz, 2H), 6.99 (d, *J* = 8.5 Hz,  
2H), 6.67 (s, 1H), 4.46 (s, 2H), 3.87 (s, 3H), 2.42 (s, 3H); <sup>13</sup>C NMR (125 MHz,  
CDCl<sub>3</sub>) δ: 170.9, 161.3, 154.1, 145.4, 134.4, 129.9, 128.4, 127.5, 119.6, 114.4, 98.9,

55.4, 53.7, 21.7; IR (KBr,  $\text{cm}^{-1}$ )  $\nu$ : 1598, 1435, 1311, 1273, 1132, 763; HRMS  $m/z$  (ESI) calcd for  $\text{C}_{18}\text{H}_{18}\text{NO}_4\text{S}$  ( $[\text{M}+\text{H}]^+$ ) 344.0951, found 344.0962.

**3-(4-(*tert*-Butyl)phenyl)-5-(tosylmethyl)isoxazole (3da):**

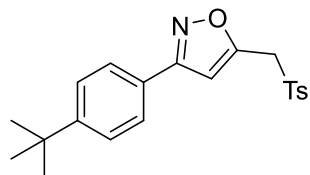

Yield: 53.9 mg (73%); yellow solid, mp 184.5-185.6 °C (uncorrected);  $^1\text{H}$  NMR (500 MHz,  $\text{CDCl}_3$ )  $\delta$ : 7.70 (d,  $J = 8.5$  Hz, 2H), 7.65 (d,  $J = 8.5$  Hz, 2H), 7.49 (d,  $J = 8.0$  Hz, 2H), 7.28 (d,  $J = 8.0$  Hz, 2H), 6.75 (s, 1H), 4.48 (s, 2H), 2.40 (s, 3H), 1.35 (s, 9H);  $^{13}\text{C}$  NMR (125 MHz,  $\text{CDCl}_3$ )  $\delta$ : 170.9, 154.1, 153.9, 145.3, 134.4, 129.8, 128.3, 125.9, 125.6, 124.0, 99.8, 53.6, 34.9, 31.0, 21.6; IR (KBr,  $\text{cm}^{-1}$ )  $\nu$ : 1592, 1429, 1316, 1291, 1167, 769; HRMS  $m/z$  (ESI) calcd for  $\text{C}_{21}\text{H}_{24}\text{NO}_3\text{S}$  ( $[\text{M}+\text{H}]^+$ ) 370.1471, found 370.1479.

**3-([1,1'-Biphenyl]-4-yl)-5-(tosylmethyl)isoxazole (3ea):**

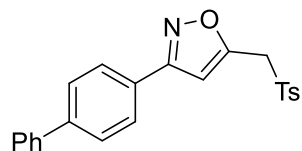

Yield: 47.5 mg (61%); yellow solid, mp 202.5-203.7 °C (uncorrected);  $^1\text{H}$  NMR (500 MHz,  $\text{CDCl}_3$ )  $\delta$ : 7.85 (d,  $J = 8.5$  Hz, 2H), 7.71 (d,  $J = 8.0$  Hz, 2H), 7.67 (d,  $J = 8.5$  Hz, 2H), 7.63 (d,  $J = 7.5$  Hz, 2H), 7.48 (t,  $J = 7.5$  Hz, 2H), 7.40 (t,  $J = 7.5$  Hz, 1H), 7.31 (d,  $J = 8.0$  Hz, 2H), 6.83 (s, 1H), 4.49 (s, 2H), 2.43 (s, 3H);  $^{13}\text{C}$  NMR (125 MHz,  $\text{CDCl}_3$ )  $\delta$ : 170.6, 154.2, 145.3, 143.3, 139.8, 134.5, 129.9, 128.9, 128.4, 128.0, 127.7, 127.0, 126.3, 125.6, 100.3, 53.7, 21.7; IR (KBr,  $\text{cm}^{-1}$ )  $\nu$ : 1595, 1433, 1307, 1286, 1161, 768; HRMS  $m/z$  (ESI) calcd for  $\text{C}_{23}\text{H}_{20}\text{NO}_3\text{S}$  ( $[\text{M}+\text{H}]^+$ ) 390.1158, found 390.1155.

**3-(4-Fluorophenyl)-5-(tosylmethyl)isoxazole (3fa):**

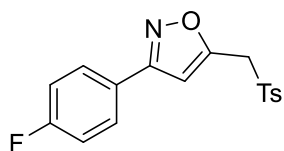

Yield: 51.0 mg (77%); yellow solid, mp 192.6-193.8 °C (uncorrected);  $^1\text{H}$  NMR (500 MHz,  $\text{CDCl}_3$ )  $\delta$ : 7.79-7.76 (m, 2H), 7.66 (d,  $J = 8.0$  Hz, 2H), 7.31 (d,  $J = 8.0$  Hz, 2H), 7.18 (t,  $J = 10.0$  Hz, 2H), 6.76 (s, 1H), 4.48 (s, 2H), 2.43 (s, 3H);  $^{13}\text{C}$  NMR (125 MHz,  $\text{CDCl}_3$ )  $\delta$ : 169.9, 163.9 (d,  $J = 252.0$  Hz), 154.3, 145.5, 134.5, 129.9, 128.3, 128.0 (d,  $J = 8.7$  Hz), 123.2 (d,  $J = 3.4$  Hz), 116.4 (d,  $J = 222$  Hz), 100.1, 53.6, 21.7;  $^{19}\text{F}$  NMR (471 MHz,  $\text{CDCl}_3$ )  $\delta$ : -108.6; IR (KBr,  $\text{cm}^{-1}$ )  $\nu$ : 1597, 1435, 1310, 1292, 1161, 764; HRMS  $m/z$  (ESI) calcd for  $\text{C}_{17}\text{H}_{15}\text{FNO}_3\text{S}$  ( $[\text{M}+\text{H}]^+$ ) 332.0751, found 332.0762.

### 3-(4-Chlorophenyl)-5-(tosylmethyl)isoxazole (3ga):

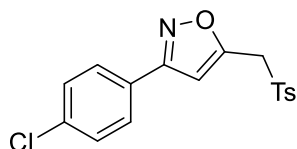

Yield: 43.7 mg (63%); yellow solid, mp 195.5-196.8 °C (uncorrected);  $^1\text{H}$  NMR (500 MHz,  $\text{CDCl}_3$ )  $\delta$ : 7.71 (d,  $J = 9.0$  Hz, 2H), 7.66 (d,  $J = 8.5$  Hz, 2H), 7.46 (d,  $J = 8.5$  Hz, 2H), 7.31 (d,  $J = 8.5$  Hz, 2H), 6.80 (s, 1H), 4.48 (s, 2H), 2.43 (s, 3H);  $^{13}\text{C}$  NMR (125 MHz,  $\text{CDCl}_3$ )  $\delta$ : 169.8, 154.3, 145.5, 136.7, 134.5, 129.9, 129.4, 128.3, 127.1, 125.2, 100.7, 53.6, 21.7; IR (KBr,  $\text{cm}^{-1}$ )  $\nu$ : 1598, 1435, 1311, 1293, 1157, 768; HRMS  $m/z$  (ESI) calcd for  $\text{C}_{17}\text{H}_{15}^{35}\text{ClNO}_3\text{S}$  ( $[\text{M}+\text{H}]^+$ ) 348.0456, found 348.0463.

### 3-(4-Bromophenyl)-5-(tosylmethyl)isoxazole (3ha):

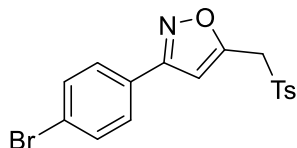

Yield: 33.6 mg (43%); yellow solid, mp 195.3-196.7 °C (uncorrected);  $^1\text{H}$  NMR (500 MHz,  $\text{CDCl}_3$ )  $\delta$ : 7.67-7.63 (m, 6H), 7.31 (d,  $J = 8.0$  Hz, 2H), 6.81 (s, 1H), 4.48 (s, 2H), 2.43 (s, 3H);  $^{13}\text{C}$  NMR (125 MHz,  $\text{CDCl}_3$ )  $\delta$ : 169.8, 154.3, 145.5, 134.5, 132.3, 129.9, 128.3, 127.3, 125.6, 125.0,

100.7, 53.6, 21.7; IR (KBr,  $\text{cm}^{-1}$ )  $\nu$ : 1592, 1427, 1312, 1280, 1159, 767; HRMS  $m/z$  (ESI) calcd for  $\text{C}_{17}\text{H}_{15}^{79}\text{BrNO}_3\text{S}$  ( $[\text{M}+\text{H}]^+$ ) 391.9951, found 391.9962.

**5-(Tosylmethyl)-3-(4-(trifluoromethyl)phenyl)isoxazole (3ia):**

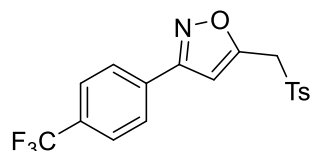

Yield: 30.5 mg (40%); yellow solid, mp 195.3-197.1 °C (uncorrected);  $^1\text{H}$  NMR (500 MHz,  $\text{CDCl}_3$ )  $\delta$ : 7.90 (d,  $J = 8.0$  Hz, 2H), 7.75 (d,  $J = 8.0$  Hz, 2H), 7.67 (d,  $J = 8.0$  Hz, 2H), 7.32 (d,  $J = 8.0$  Hz, 2H), 6.92 (s, 1H), 4.50 (s, 2H), 2.44 (s, 3H);  $^{13}\text{C}$  NMR (125 MHz,  $\text{CDCl}_3$ )  $\delta$ : 169.3, 154.5, 145.6, 134.5, 130.0, 129.9 (q,  $J = 31.8$  Hz), 128.3, 127.2 (q,  $J = 273.0$  Hz), 126.1 (q,  $J = 3.8$  Hz), 101.8, 53.6, 21.7;  $^{19}\text{F}$  NMR (471 MHz,  $\text{CDCl}_3$ )  $\delta$ : -63.0; IR (KBr,  $\text{cm}^{-1}$ )  $\nu$ : 1599, 1436, 1315, 1288, 1157, 766; HRMS  $m/z$  (ESI) calcd for  $\text{C}_{18}\text{H}_{15}\text{F}_3\text{NO}_3\text{S}$  ( $[\text{M}+\text{H}]^+$ ) 382.0719, found 382.0710.

**3-(Naphthalen-2-yl)-5-(tosylmethyl)isoxazole (3ja):**

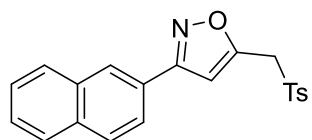

Yield: 50.8 mg (70%); yellow solid, mp 183.4-184.9 °C (uncorrected);  $^1\text{H}$  NMR (500 MHz,  $\text{CDCl}_3$ )  $\delta$ : 8.30 (s, 1H), 7.92 (t,  $J = 7.0$  Hz, 2H), 7.87 (t,  $J = 4.5$  Hz, 1H), 7.80 (d,  $J = 7.5$  Hz, 1H), 7.68 (d,  $J = 8.5$  Hz, 2H), 7.56 (t,  $J = 4.0$  Hz, 2H), 7.30 (d,  $J = 8.0$  Hz, 2H), 6.91 (s, 1H), 4.51 (s, 2H), 2.42 (s, 3H);  $^{13}\text{C}$  NMR (125 MHz,  $\text{CDCl}_3$ )  $\delta$ : 170.9, 154.3, 145.4, 134.4, 134.0, 132.9, 129.9, 128.9, 128.7, 128.4, 127.8, 127.5, 127.0, 125.8, 124.0, 122.7, 100.7, 53.7, 21.7; IR (KBr,  $\text{cm}^{-1}$ )  $\nu$ : 1593, 1441, 1312, 1287, 1172, 765; HRMS  $m/z$  (ESI) calcd for  $\text{C}_{21}\text{H}_{18}\text{NO}_3\text{S}$  ( $[\text{M}+\text{H}]^+$ ) 364.1002, found 364.1014.

**3-(Pyridin-3-yl)-5-(tosylmethyl)isoxazole (3ka):**



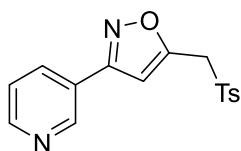

Yield: 27.6 mg (44%); yellow solid, mp 163.2-165.1 °C (uncorrected); <sup>1</sup>H NMR (500 MHz, CDCl<sub>3</sub>) δ: 9.03 (d, *J* = 2.0 Hz, 1H), 8.71-8.70 (m, 1H), 8.09-8.07 (m, 1H), 7.68 (d, *J* = 8.0 Hz, 2H), 7.46-7.43 (m, 1H), 7.32 (d, *J* = 8.0 Hz, 2H), 6.90 (s, 1H), 4.51 (s, 2H), 2.44 (s, 3H); <sup>13</sup>C NMR (125 MHz, CDCl<sub>3</sub>) δ: 168.1, 154.4, 151.3, 147.0, 145.6, 134.4, 132.9, 130.0, 128.3, 123.8, 123.1, 101.4, 53.5, 21.7; IR (KBr, cm<sup>-1</sup>) *v*: 1572, 1435, 1313, 1292, 1156, 778; HRMS *m/z* (ESI) calcd for C<sub>16</sub>H<sub>15</sub>N<sub>2</sub>O<sub>3</sub>S ([M+H]<sup>+</sup>) 315.0798, found 315.0789.

### 3-(Pyridin-2-yl)-5-(tosylmethyl)isoxazole (3la):

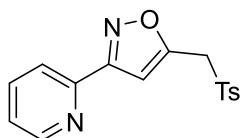

Yield: 32.0 mg (51%); yellow solid, mp 167.4-168.9 °C (uncorrected); <sup>1</sup>H NMR (500 MHz, CDCl<sub>3</sub>) δ: 8.71 (s, 1H), 7.84 (t, *J* = 7.5 Hz, 2H), 7.67 (d, *J* = 5.5 Hz, 2H), 7.38-7.36 (m, 1H), 7.30 (d, *J* = 6.5 Hz, 2H), 7.12 (s, 1H), 4.52 (s, 2H), 2.42 (s, 3H); <sup>13</sup>C NMR (125 MHz, CDCl<sub>3</sub>) δ: 170.1, 154.5, 150.1, 145.9, 145.4, 137.0, 134.4, 129.9, 128.3, 124.7, 121.0, 103.1, 53.6, 21.6; IR (KBr, cm<sup>-1</sup>) *v*: 1568, 1437, 1319, 1296, 1155, 790; HRMS *m/z* (ESI) calcd for C<sub>16</sub>H<sub>15</sub>N<sub>2</sub>O<sub>3</sub>S ([M+H]<sup>+</sup>) 315.0798, found 315.0791.

### 3-(Thiophen-3-yl)-5-(tosylmethyl)isoxazole (3ma):

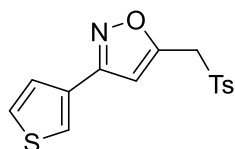

Yield: 33.2 mg (52%); yellow solid, mp 172.6-174.3 °C (uncorrected); <sup>1</sup>H NMR (500 MHz, CDCl<sub>3</sub>) δ: 7.79-7.78 (m, 1H), 7.65 (d, *J* = 8.5 Hz, 2H), 7.44-7.43 (m, 1H), 7.41-7.39 (m, 1H), 7.30 (d, *J* = 8.5 Hz, 2H), 6.65 (s, 1H), 4.49 (s, 2H), 2.42 (s, 3H); <sup>13</sup>C NMR (125 MHz, CDCl<sub>3</sub>) δ: 167.0, 154.0, 145.4, 134.4, 129.9, 128.3, 128.2, 127.2, 125.2, 124.8, 100.1, 53.6, 21.7; IR

(KBr,  $\text{cm}^{-1}$ )  $\nu$ : 1593, 1435, 1310, 1291, 1157, 772; HRMS  $m/z$  (ESI) calcd for  $\text{C}_{15}\text{H}_{14}\text{NO}_3\text{S}_2$  ( $[\text{M}+\text{H}]^+$ ) 320.0410, found 320.0422.

**Product (3na):**

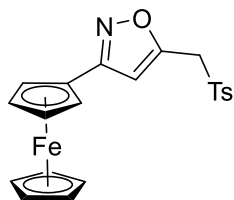

Yield: 48.0 mg (57%); yellow solid, mp 243.1-244.3 °C (uncorrected);  $^1\text{H}$  NMR (500 MHz,  $\text{CDCl}_3$ )  $\delta$ : 7.66 (d,  $J = 8.0$  Hz, 2H), 7.30 (d,  $J = 8.0$  Hz, 2H), 6.41 (s, 1H), 4.73 (t,  $J = 1.5$  Hz, 2H), 4.44 (s, 2H), 4.42 (t,  $J = 1.5$  Hz, 2H), 4.12 (s, 5H), 2.41 (s, 3H);  $^{13}\text{C}$  NMR (125 MHz,  $\text{CDCl}_3$ )  $\delta$ : 172.9, 153.9, 145.4, 134.5, 129.8, 128.4, 98.7, 70.3, 70.1, 69.9, 67.1, 53.7, 21.7; IR (KBr,  $\text{cm}^{-1}$ )  $\nu$ : 1589, 1428, 1311, 1292, 1157, 763; HRMS  $m/z$  (ESI) calcd for  $\text{C}_{21}\text{H}_{20}\text{FeNO}_3\text{S}$  ( $[\text{M}+\text{H}]^+$ ) 422.0508, found 422.0516.

**(5-(Tosylmethyl)isoxazol-3-yl)methyl benzoate (3oa):**

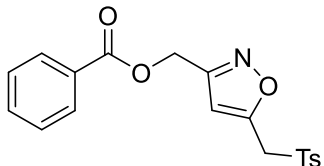

Yield: 37.1 mg (50%); yellow solid, mp 145.6-146.8 °C (uncorrected);  $^1\text{H}$  NMR (500 MHz,  $\text{CDCl}_3$ )  $\delta$ : 8.06 (d,  $J = 8.5$  Hz, 2H), 7.64-7.59 (m, 3H), 7.47 (t,  $J = 7.5$  Hz, 2H), 7.26 (d,  $J = 7.0$  Hz, 2H), 6.59 (s, 1H), 5.41 (s, 2H), 4.46 (s, 2H), 2.39 (s, 3H);  $^{13}\text{C}$  NMR (125 MHz,  $\text{CDCl}_3$ )  $\delta$ : 167.9, 165.6, 153.8, 145.4, 134.4, 133.6, 129.9, 129.8, 128.5, 128.3, 126.3, 104.9, 56.6, 53.5, 21.6; IR (KBr,  $\text{cm}^{-1}$ )  $\nu$ : 1718, 1599, 1447, 1313, 1280, 1161, 714; HRMS  $m/z$  (ESI) calcd for  $\text{C}_{19}\text{H}_{18}\text{NO}_5\text{S}$  ( $[\text{M}+\text{H}]^+$ ) 372.0900, found 372.0912.

**3-(5-(Tosylmethyl)isoxazol-3-yl)propyl benzoate (3pa):**

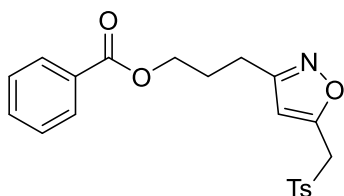

Yield: 41.5 mg (52%); white solid, mp 150.6-152.3 °C (uncorrected);  $^1\text{H}$  NMR (500 MHz,  $\text{CDCl}_3$ )  $\delta$ : 8.03 (d,  $J =$

= 7.5 Hz, 2H), 7.63 (d,  $J = 8.5$  Hz, 2H), 7.58 (t,  $J = 7.5$  Hz, 1H), 7.45 (d,  $J = 8.0$  Hz, 2H), 7.30 (d,  $J = 8.5$  Hz, 2H), 6.28 (s, 1H), 4.39 (s, 2H), 4.36 (t,  $J = 7.5$  Hz, 2H), 2.94 (t,  $J = 8.0$  Hz, 2H), 2.41 (s, 3H), 2.21-2.12 (m, 2H);  $^{13}\text{C}$  NMR (125 MHz,  $\text{CDCl}_3$ )  $\delta$ : 173.2, 166.3, 153.5, 145.3, 134.5, 133.0, 129.8(2C), 129.5, 128.3, 128.2, 102.3, 63.3, 53.5, 26.5, 23.5, 21.6; IR (KBr,  $\text{cm}^{-1}$ )  $\nu$ : 1716, 1601, 1442, 1312, 1283, 1156, 723; HRMS  $m/z$  (ESI) calcd for  $\text{C}_{21}\text{H}_{22}\text{NO}_5\text{S}$  ( $[\text{M}+\text{H}]^+$ ) 400.1213, found 400.1224.

### 3-Phenyl-5-(1-tosylethyl)isoxazole (3qa):

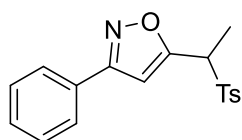

Yield: 34.0 mg (52%); yellow solid, mp 182.2-183.5 °C (uncorrected);  $^1\text{H}$  NMR (500 MHz,  $\text{CDCl}_3$ )  $\delta$ : 7.78-7.76 (m, 2H),

7.59 (d,  $J = 8.5$  Hz, 2H), 7.48-7.45 (m, 3H), 7.27 (d,  $J = 8.5$  Hz, 2H), 6.81 (s, 1H), 4.54-4.49 (m, 1H), 2.40 (s, 3H), 1.78 (d,  $J = 7.0$  Hz, 3H);  $^{13}\text{C}$  NMR (125 MHz,  $\text{CDCl}_3$ )  $\delta$ : 170.5, 159.3, 145.2, 133.0, 130.4, 129.6, 128.9 (2C), 126.8, 125.7, 99.3, 58.2, 21.6, 13.0; IR (KBr,  $\text{cm}^{-1}$ )  $\nu$ : 1595, 1431, 1312, 1293, 1155, 772; HRMS  $m/z$  (ESI) calcd for  $\text{C}_{18}\text{H}_{18}\text{NO}_3\text{S}$  ( $[\text{M}+\text{H}]^+$ ) 328.1002, found 328.1011.

### 4-(5-(Tosylmethyl)isoxazol-3-yl)benzyl *N*-(tert-butoxycarbonyl)-*N*-methylglycinate (3ra):

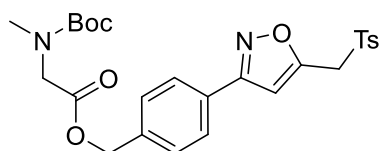

Yield: 46.3 mg (45%); yellow solid, mp 126.3-127.9 °C (uncorrected);  $^1\text{H}$  NMR (500 MHz,  $\text{CDCl}_3$ )  $\delta$ : 7.67

(t,  $J = 8.0$  Hz, 2H), 7.58 (d,  $J = 7.0$  Hz, 2H), 7.37 (t,  $J = 7.5$  Hz, 2H), 7.21 (s, 2H), 6.71 (d,  $J = 7.5$  Hz, 1H), 5.13 (d,  $J = 8.5$  Hz, 2H), 4.41 (s, 2H), 3.98 (s, 1H), 3.89 (s, 1H), 2.86 (d,  $J = 6.5$  Hz, 3H), 2.33 (s, 3H), 1.40 (s, 5H), 1.30 (s, 4H);  $^{13}\text{C}$  NMR (125 MHz,  $\text{CDCl}_3$ )  $\delta$ : 170.1 (2C), 169.6, 155.9, 155.2, 154.1, 145.3, 138.0, 137.9, 134.4

(2C), 129.8, 128.6, 128.4, 128.2, 126.6, 126.5, 125.9 (2C), 100.6, 100.5, 80.1, 65.8, 53.5, 50.9, 50.2, 35.5 (2C), 28.2, 28.0, 21.5; IR (KBr,  $\text{cm}^{-1}$ )  $\nu$ : 1710, 1678, 1595, 1441, 1309, 1281, 1157, 769; HRMS  $m/z$  (ESI) calcd for  $\text{C}_{26}\text{H}_{31}\text{N}_2\text{O}_7\text{S}$  ( $[\text{M}+\text{H}]^+$ ) 515.1846, found 515.1852.

**4-(5-(Tosylmethyl)isoxazol-3-yl)benzyl 2-(4-isobutylphenyl)propanoate (3sa):**

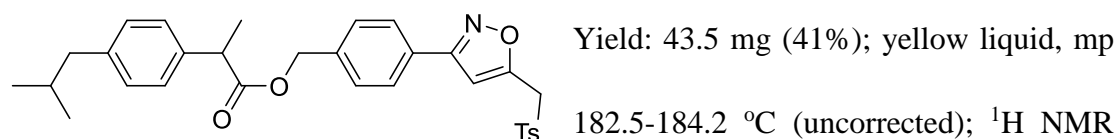

(500 MHz,  $\text{CDCl}_3$ )  $\delta$ : 7.70-7.65 (m, 4H), 7.29 (d,  $J = 8.5$  Hz, 4H), 7.21 (d,  $J = 8.0$  Hz, 2H), 7.11 (d,  $J = 8.0$  Hz, 2H), 6.77 (s, 1H), 5.12-5.11 (m, 2H), 4.48 (s, 2H), 3.80-3.76 (m, 1H), 2.46 (d,  $J = 7.5$  Hz, 2H), 2.42 (s, 3H), 1.88-1.83 (m, 1H), 1.53 (d,  $J = 7.0$  Hz, 3H), 0.90 (d,  $J = 6.5$  Hz, 6H);  $^{13}\text{C}$  NMR (125 MHz,  $\text{CDCl}_3$ )  $\delta$ : 174.3, 170.4, 154.2, 145.4, 140.7, 138.7, 137.3, 134.5, 129.9, 129.3, 128.3, 128.0, 127.1, 126.3, 125.9, 100.4, 65.5, 53.6, 45.0, 44.9, 30.1, 22.3, 21.6, 18.2; IR (KBr,  $\text{cm}^{-1}$ )  $\nu$ : 1676, 1592, 1435, 1316, 1285, 1158, 771; HRMS  $m/z$  (ESI) calcd for  $\text{C}_{31}\text{H}_{34}\text{NO}_5\text{S}$  ( $[\text{M}+\text{H}]^+$ ) 532.2152, found 532.2161.

**3-Phenyl-5-((phenylsulfonyl)methyl)isoxazole (3ab):**

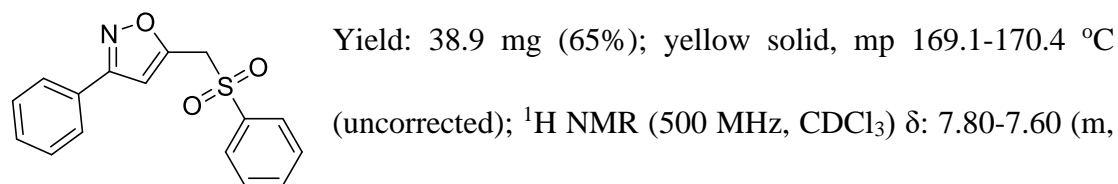

4H), 7.65 (t,  $J = 7.5$  Hz, 1H), 7.53-7.47 (m, 5H), 6.78 (s, 1H), 4.51 (s, 2H);  $^{13}\text{C}$  NMR (125 MHz,  $\text{CDCl}_3$ )  $\delta$ : 170.9, 154.0, 137.4, 134.3, 130.6, 129.2, 129.0, 128.3, 126.7, 125.8, 100.3, 53.6; IR (KBr,  $\text{cm}^{-1}$ )  $\nu$ : 1594, 1437, 1310,

1292, 1157, 768; HRMS  $m/z$  (ESI) calcd for  $C_{16}H_{14}NO_3S$  ( $[M+H]^+$ ) 300.0689, found 300.0696.

**5-(((4-Methoxyphenyl)sulfonyl)methyl)-3-phenylisoxazole (3ac):**

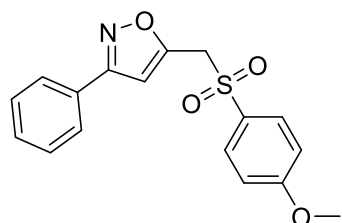

Yield: 32.9 mg (50%); yellow solid, mp 190.1-191.7 °C (uncorrected);  $^1H$  NMR (500 MHz,  $CDCl_3$ )  $\delta$ : 7.79-7.77 (m, 2H), 7.70 (d,  $J = 8.5$  Hz, 2H), 7.49-7.47 (m, 3H), 6.96 (d,  $J = 9.0$  Hz, 2H), 6.79 (s, 1H), 4.47 (s, 2H), 3.86 (s, 3H);  $^{13}C$  NMR (125 MHz,  $CDCl_3$ )  $\delta$ : 170.9, 164.1, 154.3, 130.6, 129.1, 128.8, 128.1, 126.8, 125.9, 114.5, 100.3, 55.7, 53.9; IR (KBr,  $cm^{-1}$ )  $\nu$ : 1598, 1433, 1312, 1293, 1159, 766; HRMS  $m/z$  (ESI) calcd for  $C_{17}H_{16}NO_4S$  ( $[M+H]^+$ ) 330.0795, found 330.0787.

**5-(((4-Fluorophenyl)sulfonyl)methyl)-3-phenylisoxazole (3ad):**

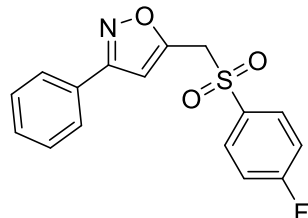

Yield: 35.5 mg (56%); yellow solid, mp 168.0-169.5 °C (uncorrected);  $^1H$  NMR (500 MHz,  $CDCl_3$ )  $\delta$ : 7.81-7.76 (m, 4H), 7.49-7.47 (m, 3H), 7.18 (t,  $J = 8.5$  Hz, 2H), 6.79 (s, 1H), 4.51 (s, 2H);  $^{13}C$  NMR (125 MHz,  $CDCl_3$ )  $\delta$ : 171.1, 166.1 (d,  $J = 257.5$  Hz), 154.0, 133.4 (d,  $J = 3.3$  Hz), 131.3 (d,  $J = 9.9$  Hz), 130.7, 129.1, 126.7, 125.8, 116.7 (d,  $J = 227.0$  Hz), 100.3, 53.7;  $^{19}F$  NMR (471 MHz,  $CDCl_3$ )  $\delta$ : -102.1; IR (KBr,  $cm^{-1}$ )  $\nu$ : 1589, 1427, 1312, 1282, 1157, 763; HRMS  $m/z$  (ESI) calcd for  $C_{16}H_{13}FNO_3S$  ( $[M+H]^+$ ) 318.0595, found 318.0588.

**5-(((4-Chlorophenyl)sulfonyl)methyl)-3-phenylisoxazole (3ae):**

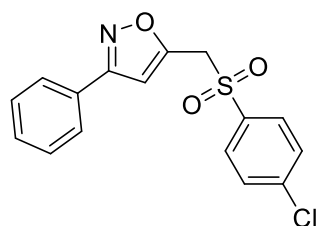

Yield: 40.0 mg (60%); yellow solid, mp 191.1-192.3 °C (uncorrected);  $^1H$  NMR (500 MHz,  $CDCl_3$ )  $\delta$ : 7.79-7.77 (m,

2H), 7.71 (d,  $J = 8.5$  Hz, 2H), 7.48 (d,  $J = 8.0$  Hz, 5H), 6.80 (s, 1H), 4.51 (s, 2H);  $^{13}\text{C}$  NMR (125 MHz,  $\text{CDCl}_3$ )  $\delta$ : 171.1, 153.9, 141.2, 135.7, 130.7, 129.8, 129.6, 129.1, 126.6, 125.8, 100.3, 53.6; IR (KBr,  $\text{cm}^{-1}$ )  $\nu$ : 1591, 1432, 1309, 1290, 1156, 767; HRMS  $m/z$  (ESI) calcd for  $\text{C}_{16}\text{H}_{13}^{35}\text{ClNO}_3\text{S}$  ( $[\text{M}+\text{H}]^+$ ) 334.0299, found 334.0311.

**5-(((4-Bromophenyl)sulfonyl)methyl)-3-phenylisoxazole (3af):**

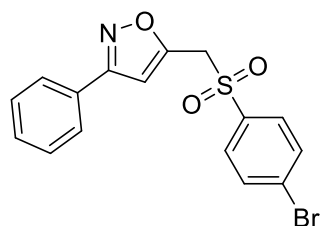

Yield: 49.0 mg (65%); yellow solid, mp 195.0-196.3 °C (uncorrected);  $^1\text{H}$  NMR (500 MHz,  $\text{CDCl}_3$ )  $\delta$ : 7.79-7.77 (m, 2H), 7.66-7.62 (m, 4H), 7.49-7.47 (m, 3H), 6.79 (s, 1H), 4.50 (s, 2H);  $^{13}\text{C}$  NMR (125 MHz,  $\text{CDCl}_3$ )  $\delta$ : 171.2, 153.9, 136.4, 132.6, 130.7, 129.9, 129.8, 129.1, 126.6, 125.9, 100.3, 53.6; IR (KBr,  $\text{cm}^{-1}$ )  $\nu$ : 1589, 1427, 1313, 1286, 1157, 768; HRMS  $m/z$  (ESI) calcd for  $\text{C}_{16}\text{H}_{13}^{79}\text{BrNO}_3\text{S}$  ( $[\text{M}+\text{H}]^+$ ) 377.9794, found 377.9785.

**5-(((4-Nitrophenyl)sulfonyl)methyl)-3-phenylisoxazole (3ag):**

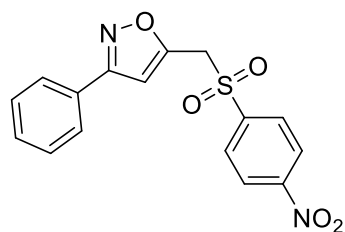

Yield: 28.2 mg (41%); white solid, mp 217.2-218.9 °C (uncorrected);  $^1\text{H}$  NMR (500 MHz,  $\text{DMSO}-d_6$ )  $\delta$ : 8.44 (d,  $J = 9.0$  Hz, 2H), 8.13 (d,  $J = 9.0$  Hz, 2H), 7.88-7.86 (m, 2H), 7.55-7.53 (m, 3H), 7.01 (s, 1H), 5.17 (s, 2H);  $^{13}\text{C}$  NMR (125 MHz,  $\text{DMSO}-d_6$ )  $\delta$ : 170.3, 154.7, 151.3, 143.7, 131.2, 130.5, 129.8, 126.7, 126.2, 125.0, 101.9, 52.2; IR (KBr,  $\text{cm}^{-1}$ )  $\nu$ : 1598, 1433, 1312, 1282, 1159, 765; HRMS  $m/z$  (ESI) calcd for  $\text{C}_{16}\text{H}_{13}\text{N}_2\text{O}_5\text{S}$  ( $[\text{M}+\text{H}]^+$ ) 345.0540, found 345.0552.

**5-(((3-Chlorophenyl)sulfonyl)methyl)-3-phenylisoxazole (3ah):**

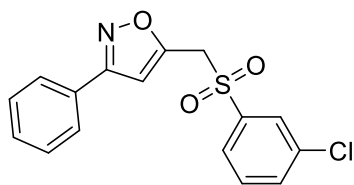

Yield: 32.0 mg (48%); white solid, mp 187.4-189.2 °C (uncorrected); <sup>1</sup>H NMR (500 MHz, CDCl<sub>3</sub>) δ: 7.73 (s, 1H), 7.70-7.68 (m, 2H), 7.58-7.52 (m, 2H), 7.41-7.35 (m, 4H), 6.70 (s, 1H), 4.44 (s, 2H); <sup>13</sup>C NMR (125 MHz, CDCl<sub>3</sub>) δ: 171.2, 153.7, 139.1, 135.6, 134.4, 130.7, 130.5, 129.0, 128.4, 126.6, 126.5, 125.9, 100.3, 53.6; IR (KBr, cm<sup>-1</sup>) ν: 1593, 1430, 1311, 1288, 1155, 766; HRMS *m/z* (ESI) calcd for C<sub>16</sub>H<sub>13</sub><sup>35</sup>ClNO<sub>3</sub>S ([M+H]<sup>+</sup>) 334.0299, found 334.0309.

### 5-(((2-Chlorophenyl)sulfonyl)methyl)-3-phenylisoxazole (3ai):

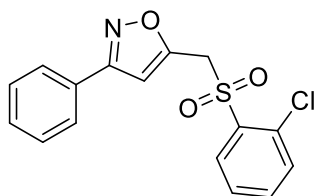

Yield: 27.3 mg (41%); yellow solid, mp 153.8-155.1 °C (uncorrected); <sup>1</sup>H NMR (500 MHz, CDCl<sub>3</sub>) δ: 7.95-7.93 (m, 1H), 7.73-7.71 (m, 2H), 7.60-7.54 (m, 2H), 7.45-7.44 (m, 3H), 7.38-7.35 (m, 1H), 6.69 (s, 1H), 4.84 (s, 2H); <sup>13</sup>C NMR (125 MHz, CDCl<sub>3</sub>) δ: 171.0, 153.5, 135.3, 135.1, 133.0, 132.0, 131.9, 130.6, 129.0, 127.3, 126.7, 125.8, 100.3, 51.5; IR (KBr, cm<sup>-1</sup>) ν: 1598, 1431, 1312, 1289, 1158, 763; HRMS *m/z* (ESI) calcd for C<sub>16</sub>H<sub>13</sub><sup>35</sup>ClNO<sub>3</sub>S ([M+H]<sup>+</sup>) 334.0299, found 334.0304.

### 3-Phenyl-5-(((2,4,6-trichlorophenyl)sulfonyl)methyl)isoxazole (3aj):

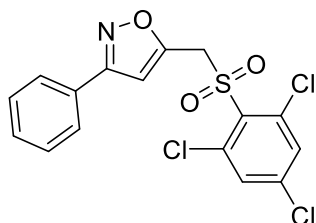

Yield: 31.3 mg (39%); white solid, mp 176.9-178.5 °C (uncorrected); <sup>1</sup>H NMR (500 MHz, CDCl<sub>3</sub>) δ: 7.77-7.75 (m, 2H), 7.46 (t, *J* = 6.0 Hz, 5H), 6.82 (s, 1H), 4.83 (s, 2H); <sup>13</sup>C NMR (125 MHz, CDCl<sub>3</sub>) δ: 171.2, 153.2, 140.2, 137.6, 131.6, 130.7, 129.1, 126.7, 125.9, 100.7, 52.9; IR (KBr, cm<sup>-1</sup>) ν: 1593, 1435, 1308, 1291, 1156, 763; HRMS *m/z* (ESI) calcd for C<sub>16</sub>H<sub>11</sub><sup>35</sup>Cl<sub>3</sub>NO<sub>3</sub>S ([M+H]<sup>+</sup>) 401.9520, found 401.9527.

**5-(((2,3-Dihydrobenzofuran-5-yl)sulfonyl)methyl)-3-phenylisoxazole (3ak):**

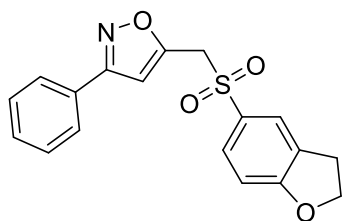

Yield: 34.8 mg (51%); yellow solid, mp 190.4-191.6 °C (uncorrected); <sup>1</sup>H NMR (500 MHz, CDCl<sub>3</sub>) δ: 7.79-7.77 (m, 2H), 7.60 (s, 1H), 7.55-7.53 (m, 1H), 7.49-7.46 (m, 3H), 6.80 (t, *J* = 6.0 Hz, 2H), 4.68 (t, *J* = 8.5 Hz, 2H), 4.46 (s, 2H), 3.23 (t, *J* = 9.0 Hz, 2H); <sup>13</sup>C NMR (125 MHz, CDCl<sub>3</sub>) δ: 170.9, 165.2, 154.4, 130.6, 130.3, 129.1, 128.9, 128.7, 126.9, 125.9, 125.5, 109.7, 100.4, 72.5, 53.9, 28.9; IR (KBr, cm<sup>-1</sup>) *v*: 1594, 1431, 1308, 1287, 1163, 772; HRMS *m/z* (ESI) calcd for C<sub>18</sub>H<sub>16</sub>NO<sub>4</sub>S ([M+H]<sup>+</sup>) 342.0795, found 342.0787.

**5-((Naphthalen-2-ylsulfonyl)methyl)-3-phenylisoxazole (3al):**

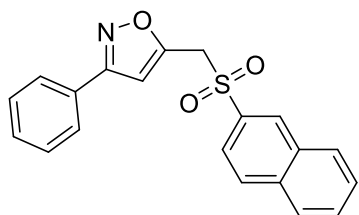

Yield: 30.7 mg (44%); yellow solid, mp 221.3-223.1 °C (uncorrected); <sup>1</sup>H NMR (500 MHz, CDCl<sub>3</sub>) δ: 8.40 (s, 1H), 7.96-7.90 (m, 3H), 7.76-7.73 (m, 3H), 7.67 (t, *J* = 7.5 Hz, 1H), 7.60 (t, *J* = 7.5 Hz, 1H), 7.46 (s, 3H), 6.81 (s, 1H), 4.58 (s, 2H); <sup>13</sup>C NMR (125 MHz, CDCl<sub>3</sub>) δ: 171.0, 154.0, 135.5, 134.5, 132.0, 130.6, 130.5, 129.6, 129.5, 129.5, 129.0, 128.0, 127.8, 126.8, 125.9, 122.7, 100.4, 53.7; IR (KBr, cm<sup>-1</sup>) *v*: 1590, 1432, 1308, 1287, 1163, 764; HRMS *m/z* (ESI) calcd for C<sub>20</sub>H<sub>16</sub>NO<sub>3</sub>S ([M+H]<sup>+</sup>) 350.0845, found 350.0852.

**3-Phenyl-5-((thiophen-2-ylsulfonyl)methyl)isoxazole (3am):**

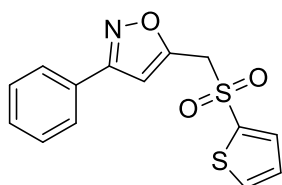

Yield: 28.7 mg (47%); yellow solid, mp 167.3-168.8 °C (uncorrected); <sup>1</sup>H NMR (500 MHz, CDCl<sub>3</sub>) δ: 7.79-7.78 (m, 2H), 7.72-7.71 (m, 1H), 7.59-7.58 (m, 1H), 7.49-7.47 (m, 3H),



7.12 (t,  $J = 4.5$  Hz, 1H), 6.80 (s, 1H), 4.60 (s, 2H);  $^{13}\text{C}$  NMR (125 MHz,  $\text{CDCl}_3$ )  $\delta$ : 171.1, 154.1, 137.9, 135.2, 135.1, 130.6, 129.1, 128.0, 126.8, 125.9, 100.3, 54.9; IR (KBr,  $\text{cm}^{-1}$ )  $\nu$ : 1570, 1456, 1314, 1165, 1126, 768; HRMS  $m/z$  (ESI) calcd for  $\text{C}_{14}\text{H}_{12}\text{NO}_3\text{S}_2$  ( $[\text{M}+\text{H}]^+$ ) 306.0253, found 306.0261.

**5-((Methylsulfonyl)methyl)-3-phenylisoxazole (3an):**

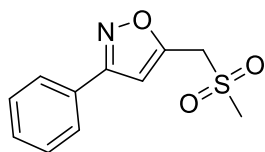

Yield: 27.5 mg (58%); yellow solid, mp 183.3-184.9 °C (uncorrected);  $^1\text{H}$  NMR (500 MHz,  $\text{CDCl}_3$ )  $\delta$ : 7.80 (t,  $J = 4.0$  Hz, 2H), 7.49-7.48 (m, 3H), 6.79 (s, 1H), 4.49 (s, 2H), 2.94 (s, 3H);  $^{13}\text{C}$  NMR (125 MHz,  $\text{CDCl}_3$ )  $\delta$ : 171.5, 154.6, 130.8, 129.1, 126.6, 125.9, 100.4, 52.1, 39.7; IR (KBr,  $\text{cm}^{-1}$ )  $\nu$ : 1589, 1433, 1312, 1287, 1155, 761; HRMS  $m/z$  (ESI) calcd for  $\text{C}_{11}\text{H}_{12}\text{NO}_3\text{S}$  ( $[\text{M}+\text{H}]^+$ ) 238.0532, found 238.0535.

**5-((Cyclopropylsulfonyl)methyl)-3-phenylisoxazole (3ao):**

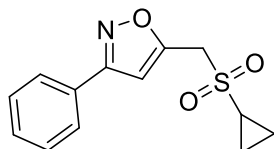

Yield: 25.2 mg (48%); white solid, mp 154.2-155.8 °C (uncorrected);  $^1\text{H}$  NMR (500 MHz,  $\text{CDCl}_3$ )  $\delta$ : 7.81-7.79 (m, 2H), 7.48 (d,  $J = 6.0$  Hz, 3H), 6.80 (s, 1H), 4.43 (s, 2H), 2.44-2.39 (m, 1H), 1.24-1.21 (m, 2H), 1.07-1.04 (m, 2H);  $^{13}\text{C}$  NMR (125 MHz,  $\text{CDCl}_3$ )  $\delta$ : 171.2, 154.5, 130.7, 129.1, 126.8, 125.9, 100.4, 51.2, 28.9, 5.1; IR (KBr,  $\text{cm}^{-1}$ )  $\nu$ : 1587, 1429, 1312, 1294, 1157, 753; HRMS  $m/z$  (ESI) calcd for  $\text{C}_{13}\text{H}_{14}\text{NO}_3\text{S}$  ( $[\text{M}+\text{H}]^+$ ) 264.0689, found 264.0680.

**Methyl 3-(((3-phenylisoxazol-5-yl)methyl)sulfonyl)propanoate (3ap):**

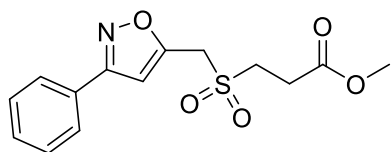

Yield: 37.7 mg (61%); yellow solid, mp 157.2-159.1 °C (uncorrected);  $^1\text{H}$  NMR (500 MHz,  $\text{CDCl}_3$ )  $\delta$ :

7.80-7.79 (m, 2H), 7.49-7.47 (m, 3H), 6.78 (s, 1H), 4.45 (s, 2H), 3.73 (s, 3H), 3.39 (t,  $J = 7.5$  Hz, 2H), 2.88 (t,  $J = 7.5$  Hz, 2H);  $^{13}\text{C}$  NMR (125 MHz,  $\text{CDCl}_3$ )  $\delta$ : 171.5, 170.4, 154.2, 130.7, 129.1, 126.6, 125.9, 100.4, 52.4, 50.8, 47.3, 26.8; IR (KBr,  $\text{cm}^{-1}$ )  $\nu$ : 1679, 1593, 1432, 1311, 1292, 1157, 772; HRMS  $m/z$  (ESI) calcd for  $\text{C}_{14}\text{H}_{16}\text{NO}_5\text{S}$  ( $[\text{M}+\text{H}]^+$ ) 310.0744, found 310.0750.

**2,6-Di-*tert*-butyl-4-(tosylmethyl)phenol (4):**<sup>[1]</sup>

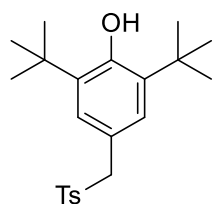

Yield: 38.9 mg (52%); white solid;  $^1\text{H}$  NMR (500 MHz,  $\text{CDCl}_3$ )  $\delta$ : 7.44 (d,  $J = 8.0$  Hz, 2H), 7.21 (d,  $J = 8.0$  Hz, 2H), 6.73 (s, 2H), 5.26 (s, 1H), 4.20 (s, 2H), 2.40 (s, 3H), 1.32 (s, 18H);  $^{13}\text{C}$  NMR (125 MHz,  $\text{CDCl}_3$ )  $\delta$ : 154.1, 144.3, 135.9, 134.9, 129.2, 128.8, 127.6, 118.9, 63.2, 34.1, 30.0, 21.5.

## (C) Spectra

### 3-phenyl-5-(tosylmethyl)isoxazole (3aa)

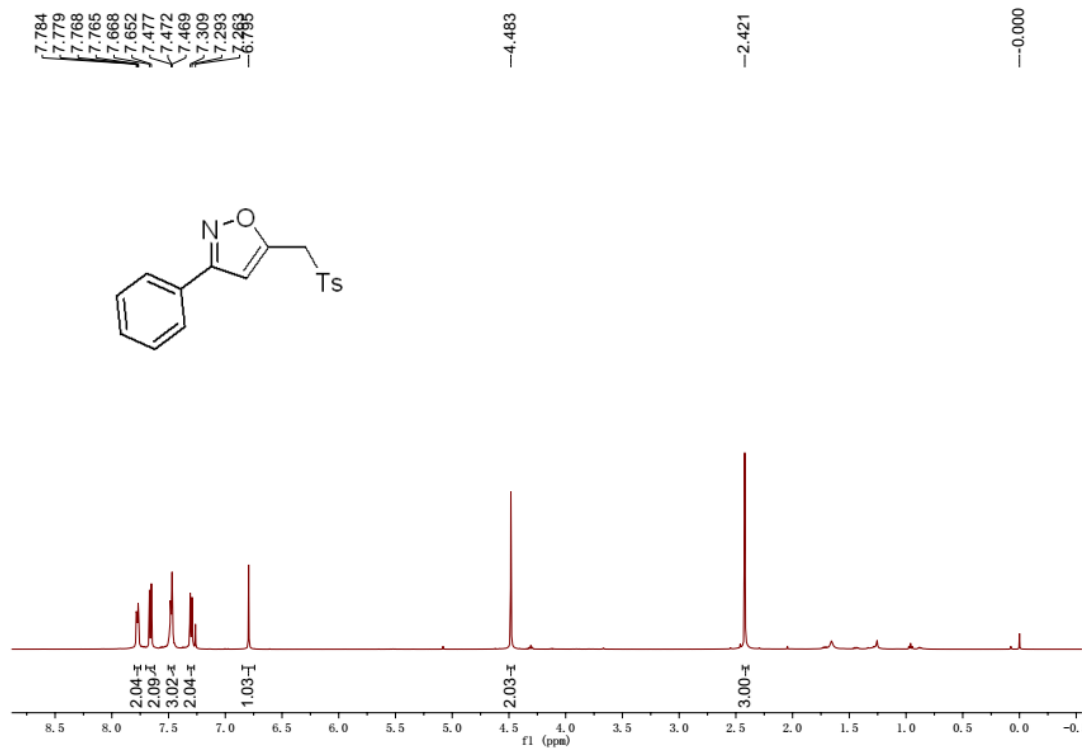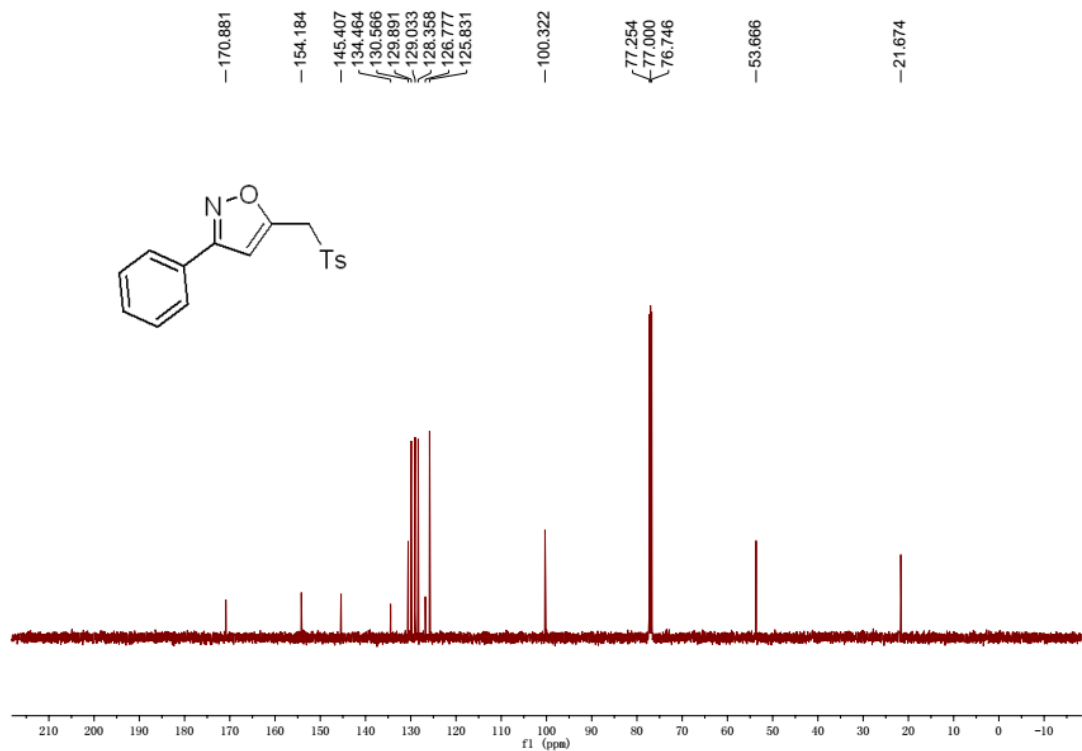

### 3-(p-tolyl)-5-(tosylmethyl)isoxazole (3ba)

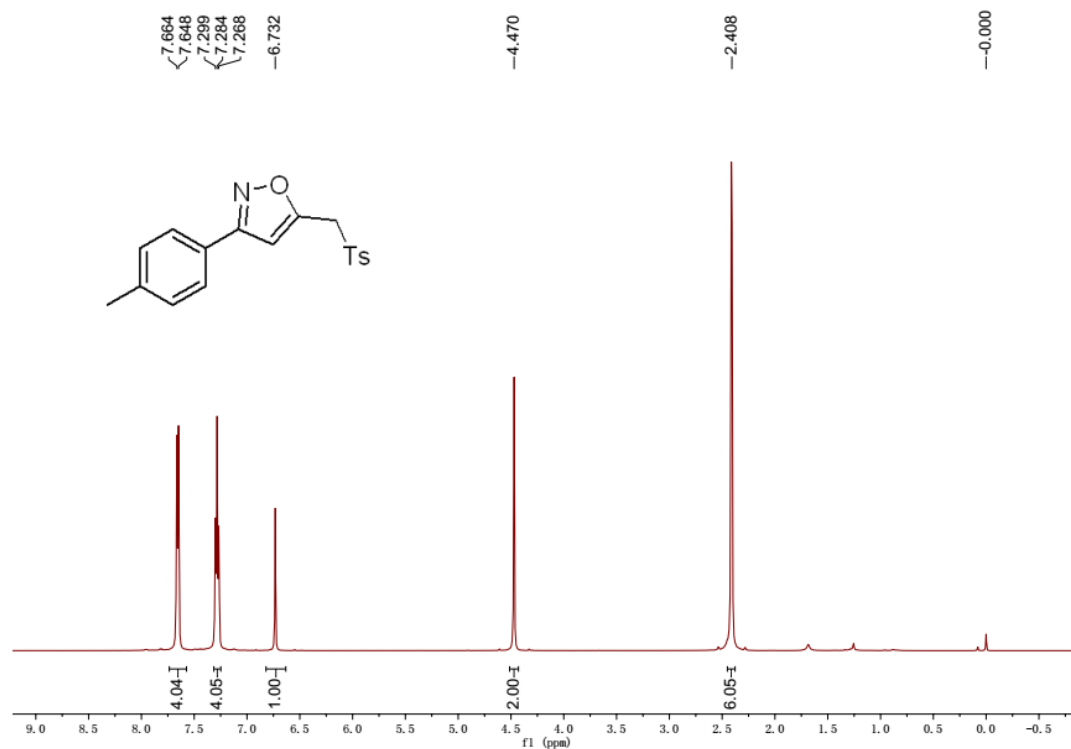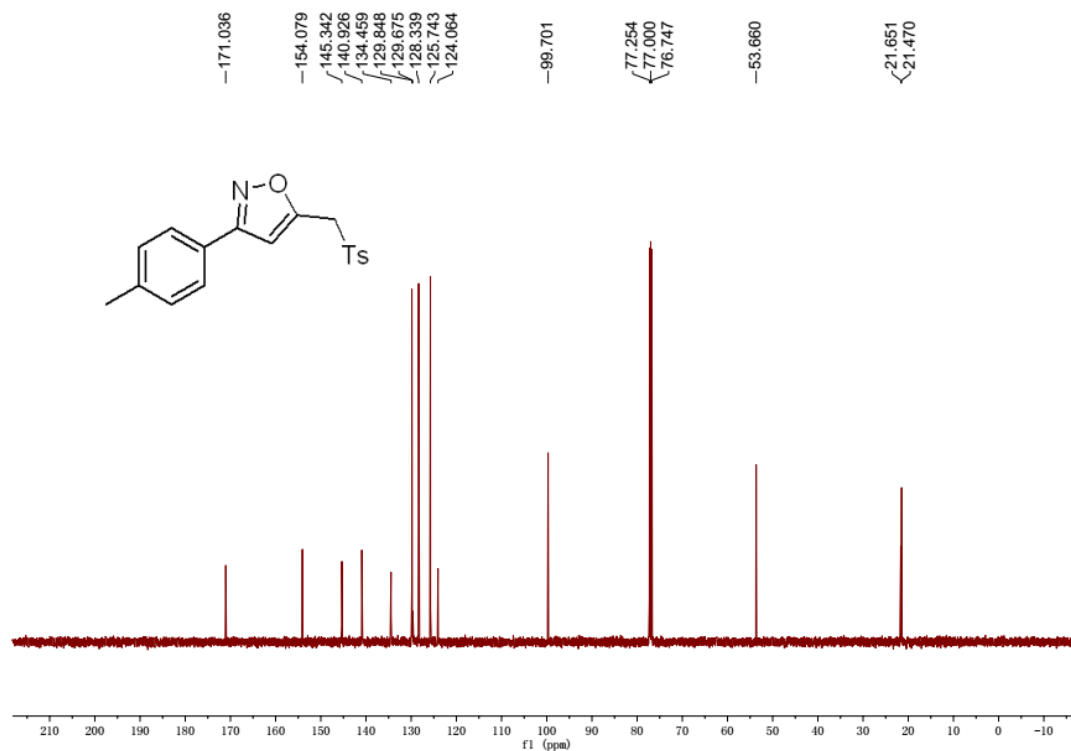

### 3-(4-methoxyphenyl)-5-(tosylmethyl)isoxazole (3ca)

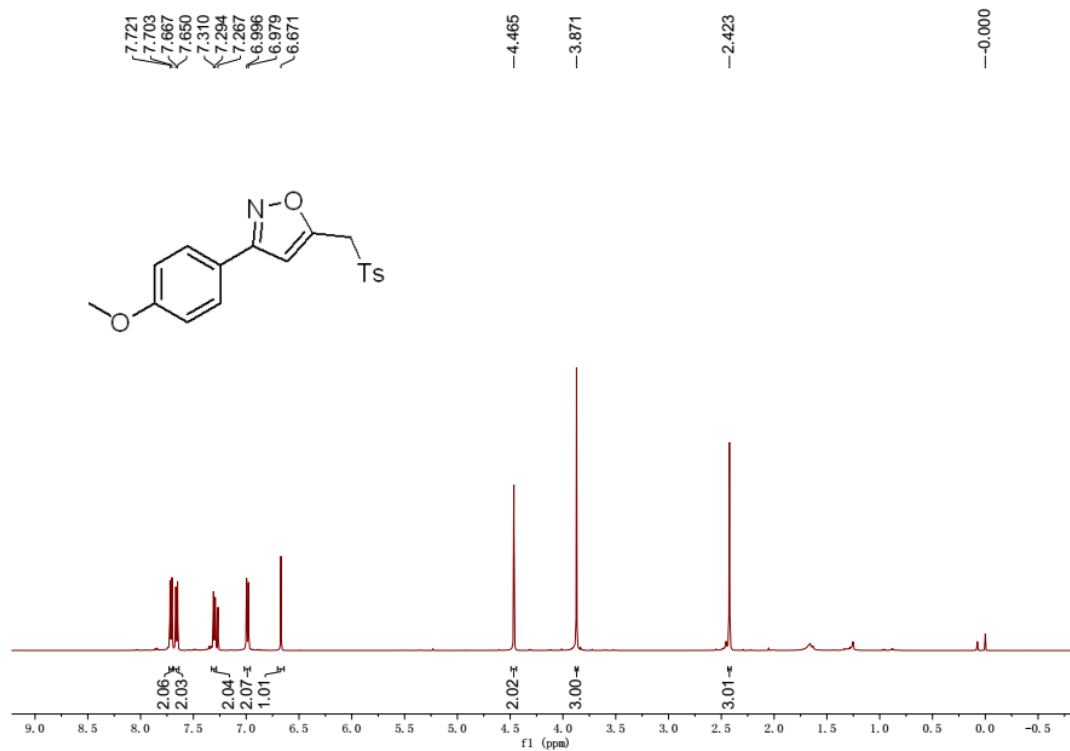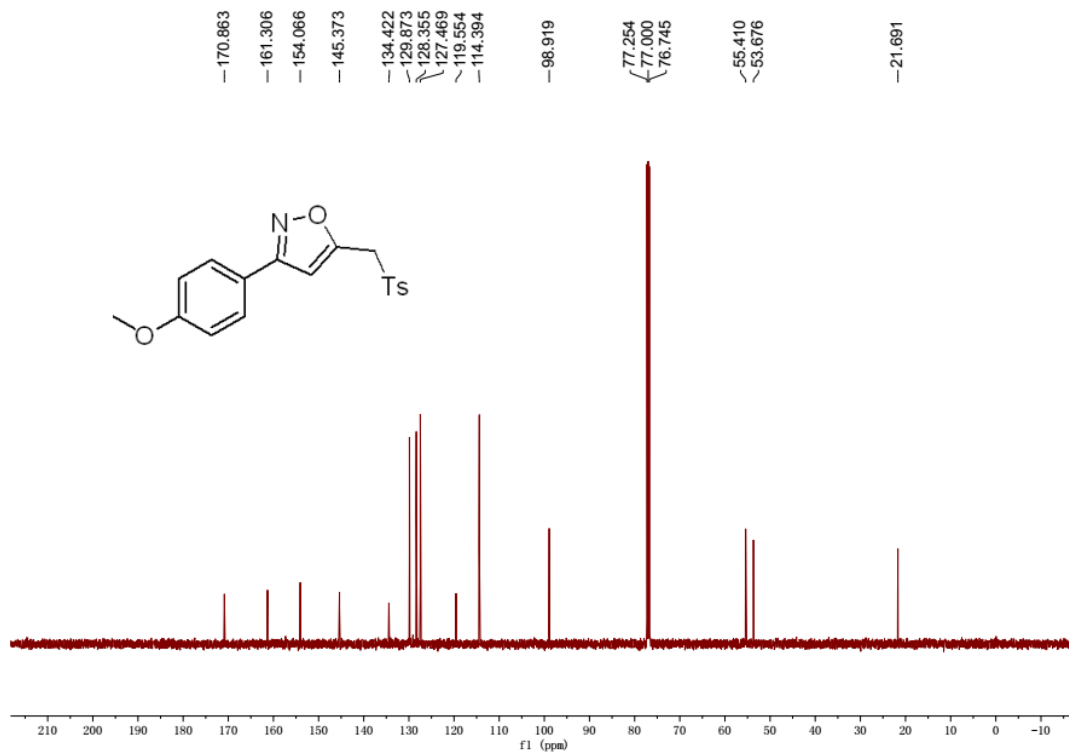

### 3-(4-(*tert*-butyl)phenyl)-5-(tosylmethyl)isoxazole (3da)

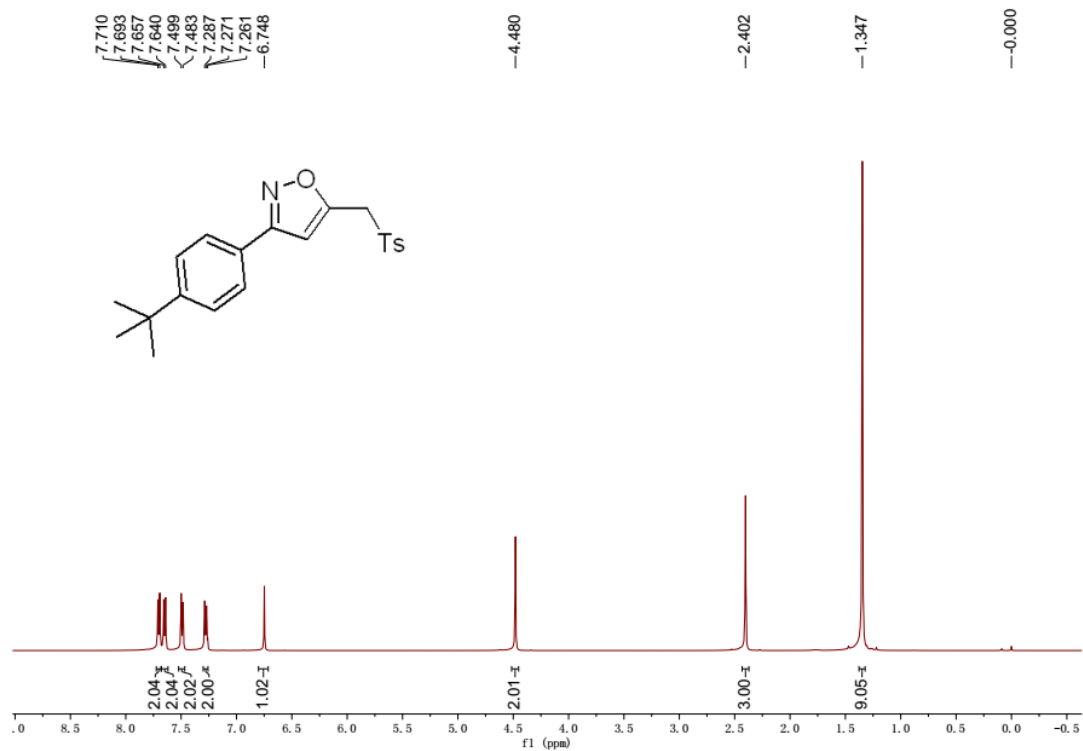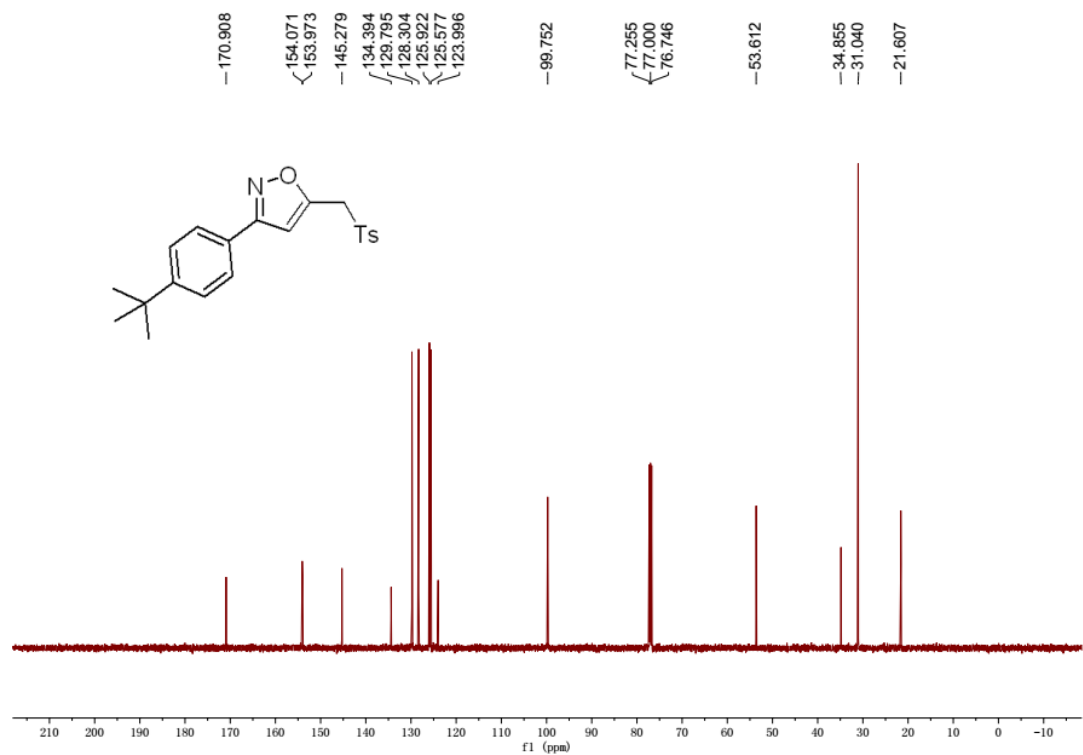

### 3-([1,1'-biphenyl]-4-yl)-5-(tosylmethyl)isoxazole (3ea)

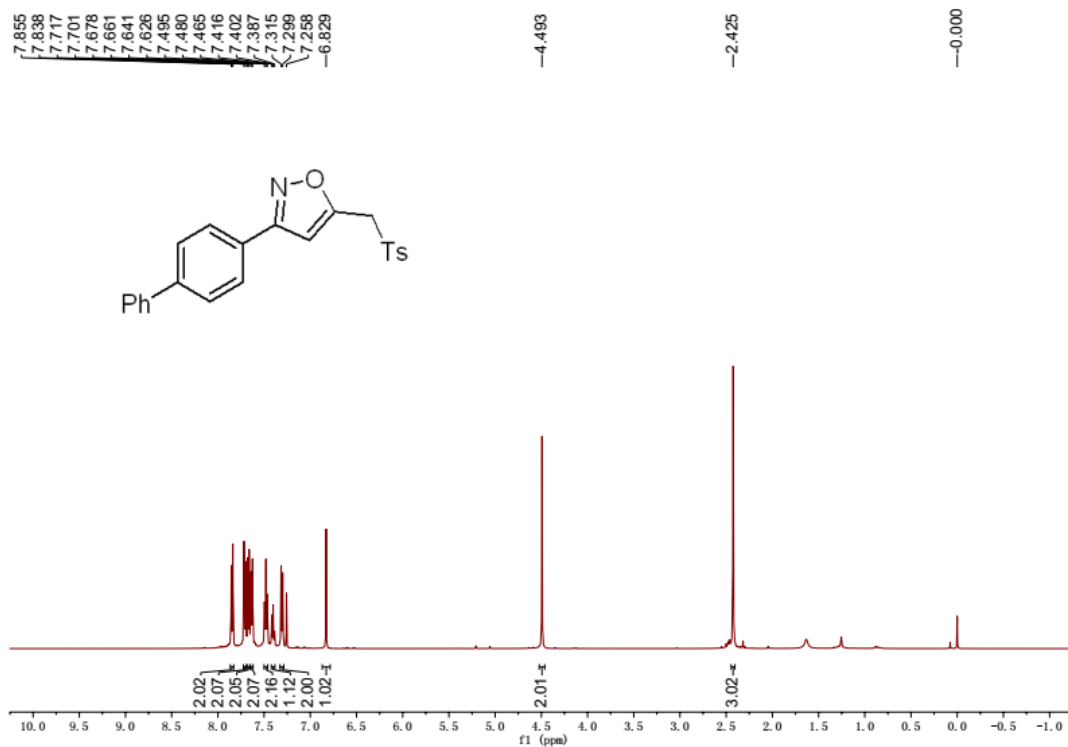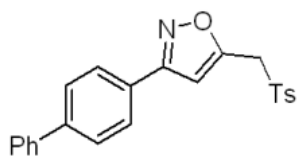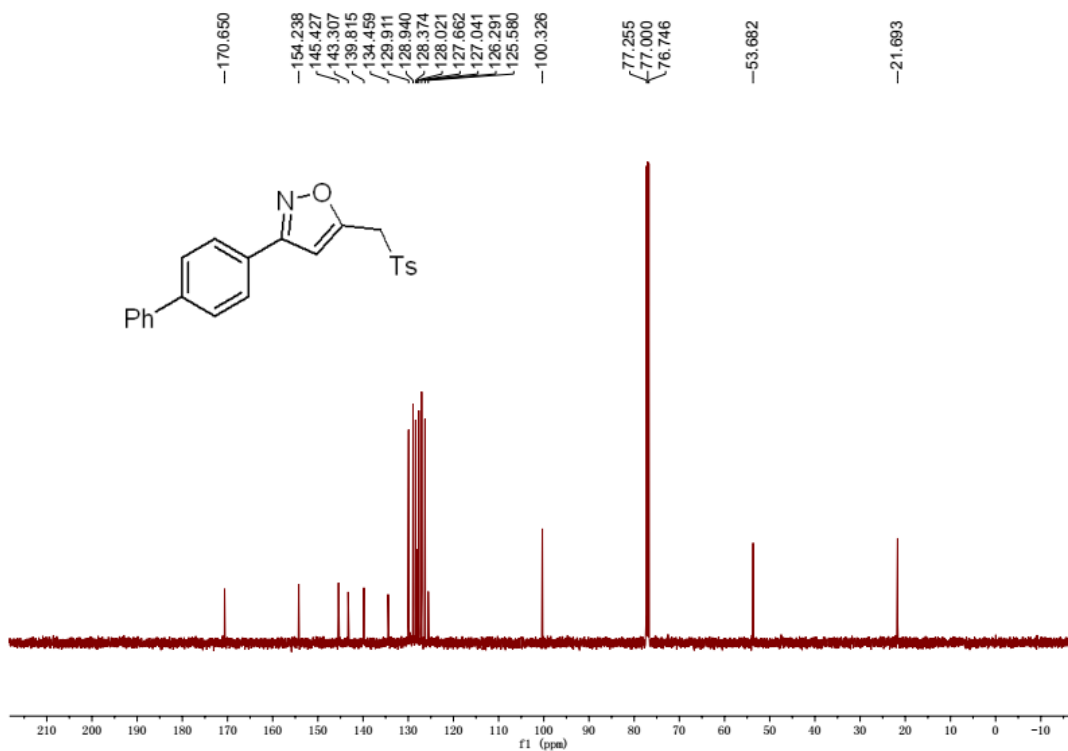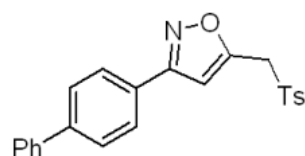

### 3-(4-fluorophenyl)-5-(tosylmethyl)isoxazole (3fa)

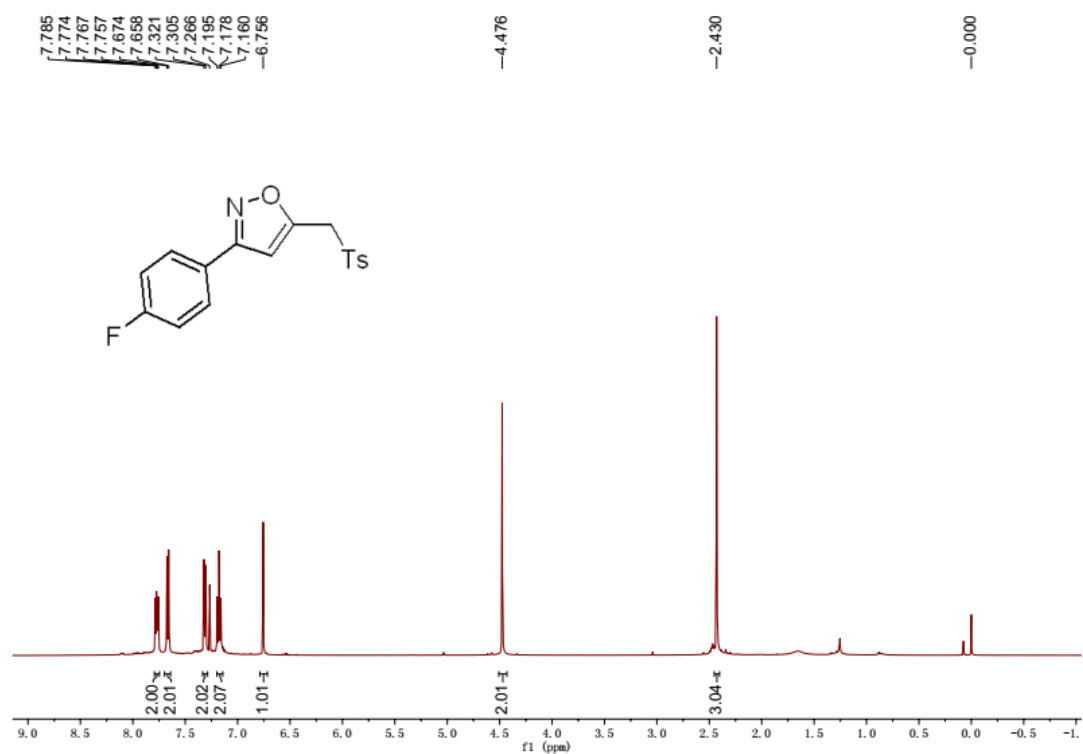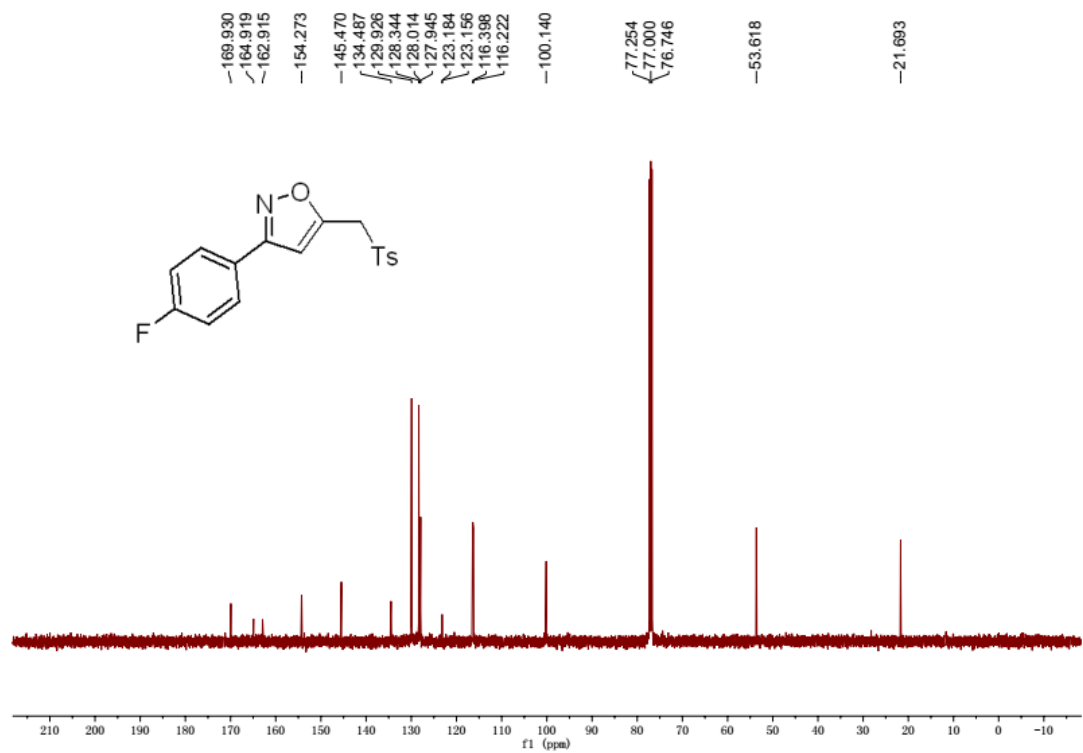



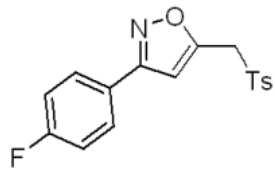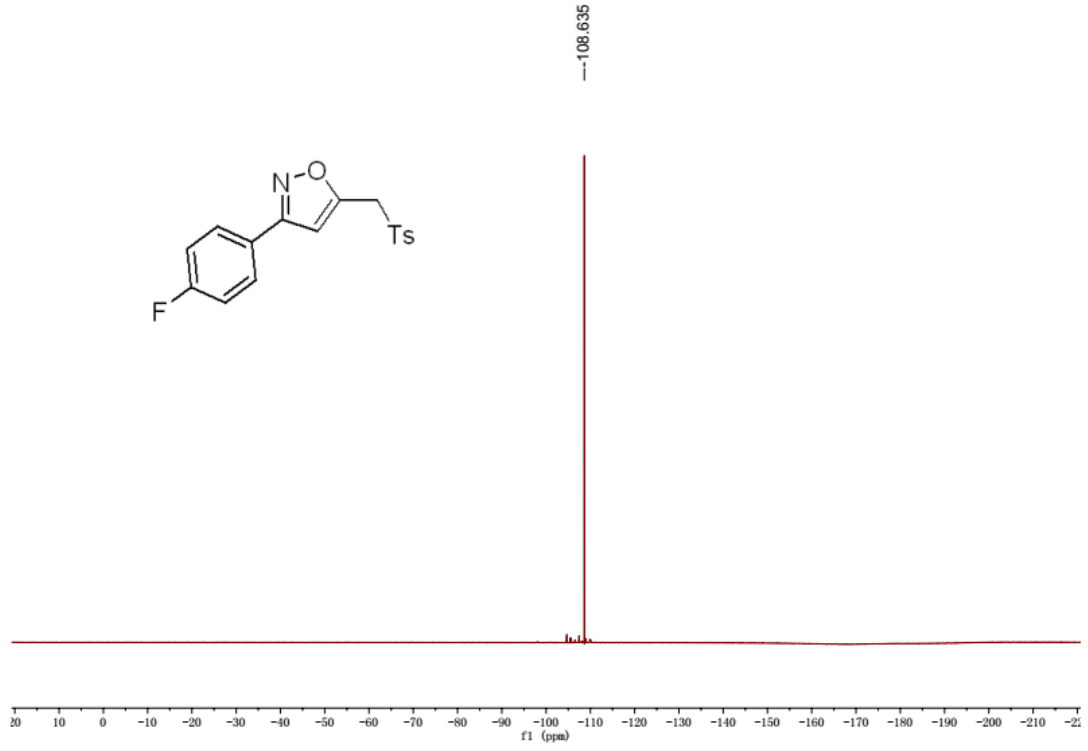

### 3-(4-chlorophenyl)-5-(tosylmethyl)isoxazole (3ga)

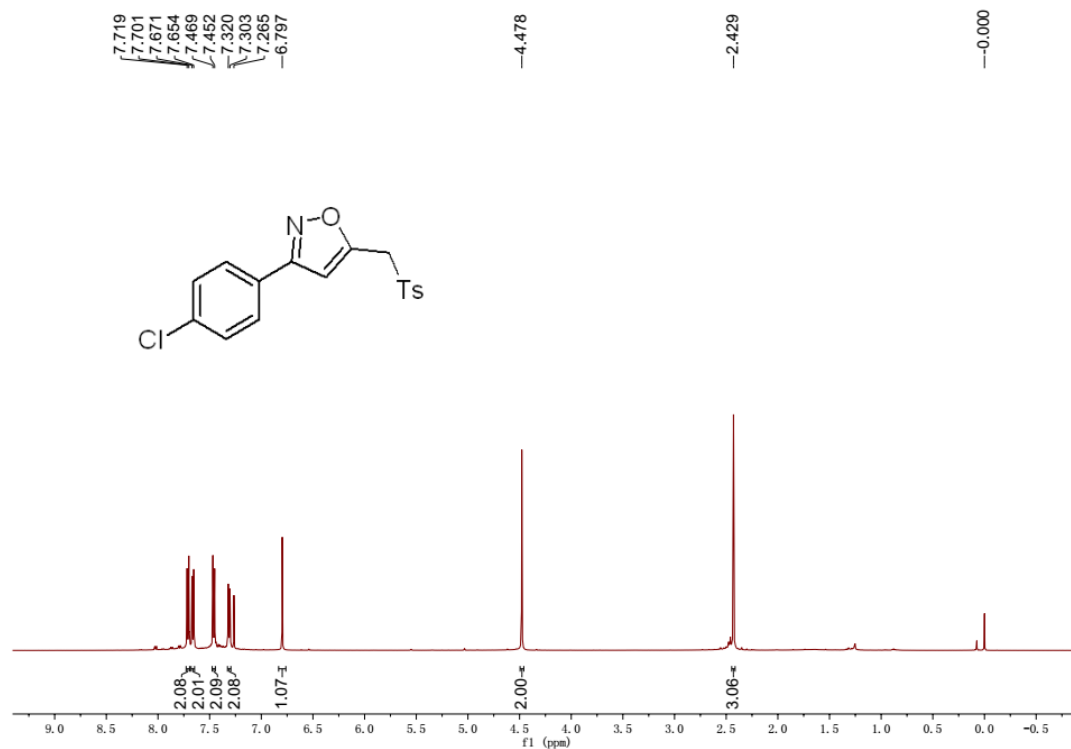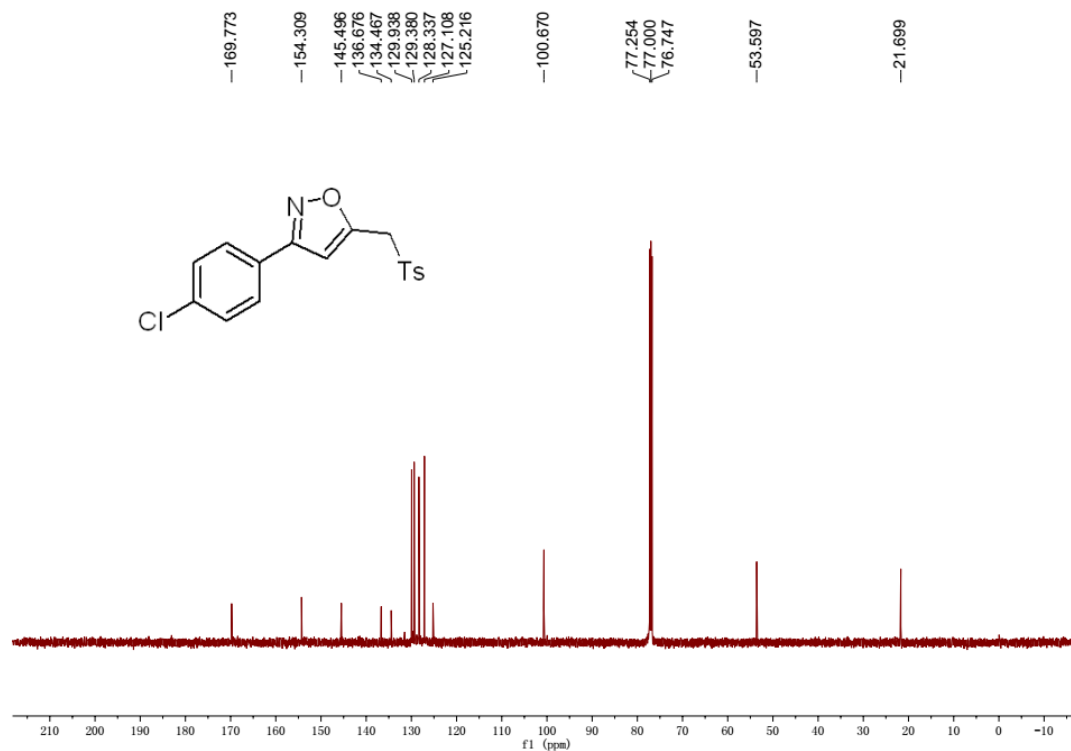

### 3-(4-bromophenyl)-5-(tosylmethyl)isoxazole (3ha)

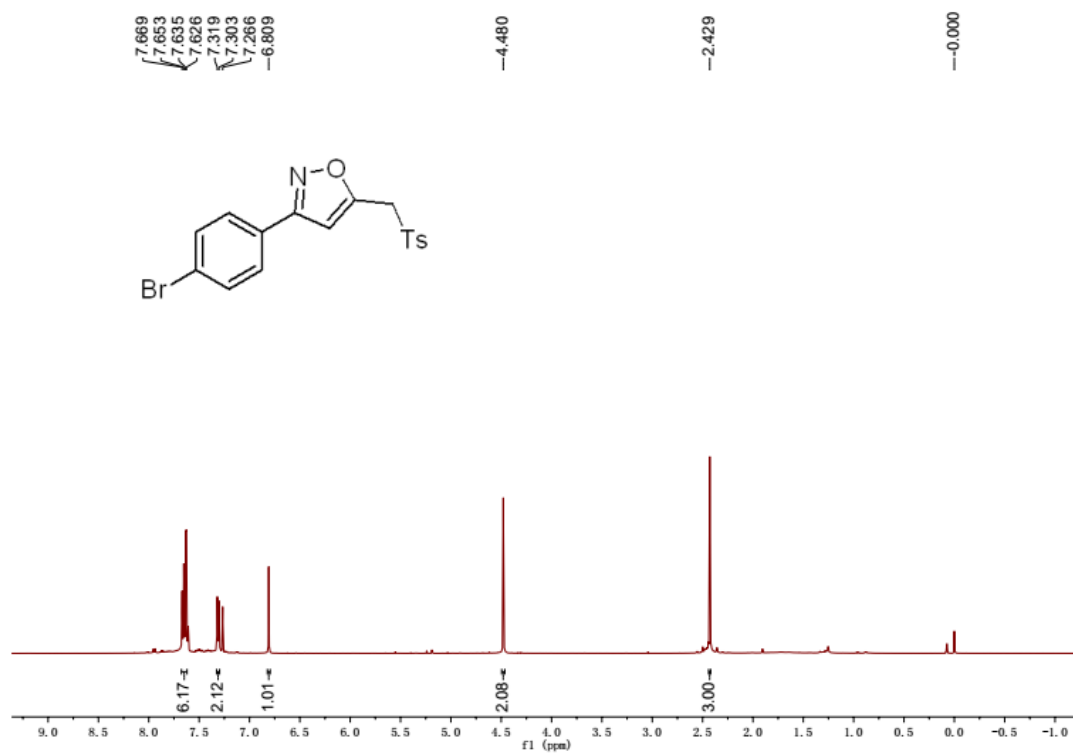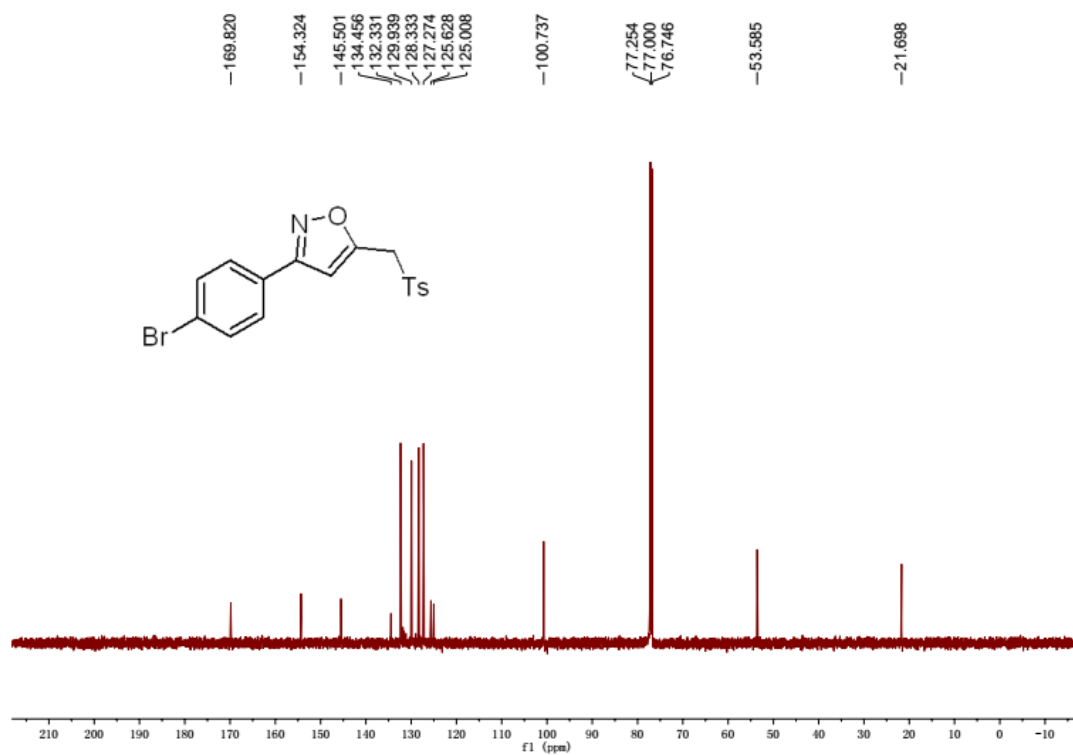

### 5-(tosylmethyl)-3-(4-(trifluoromethyl)phenyl)isoxazole (3ia)

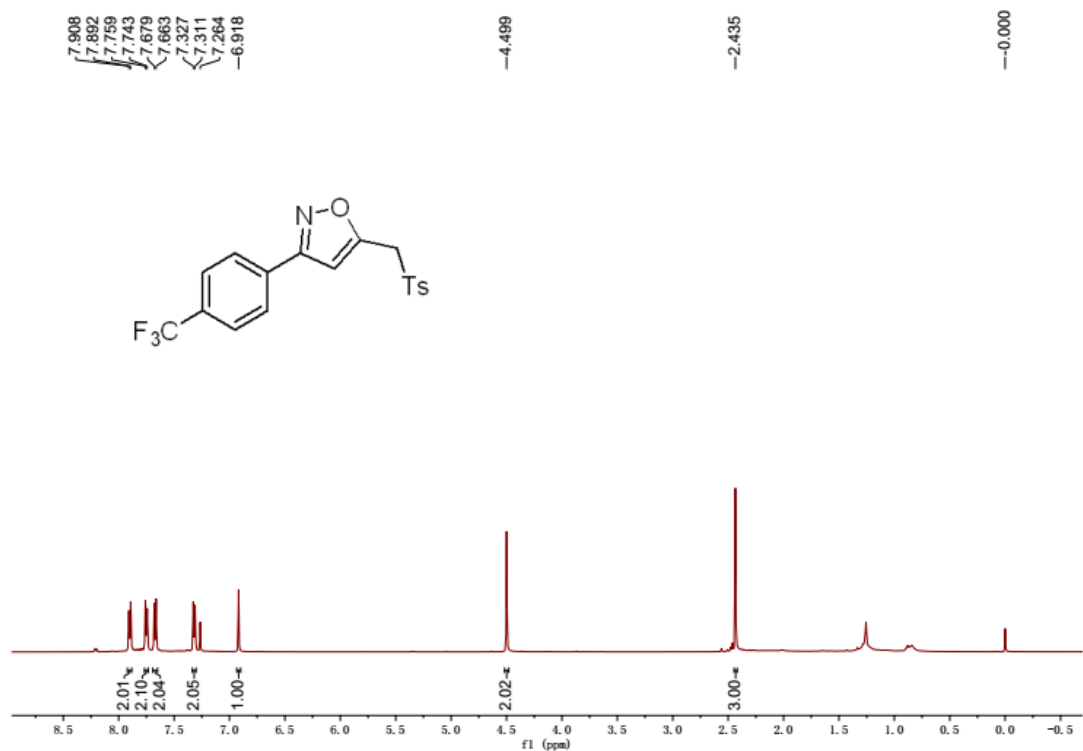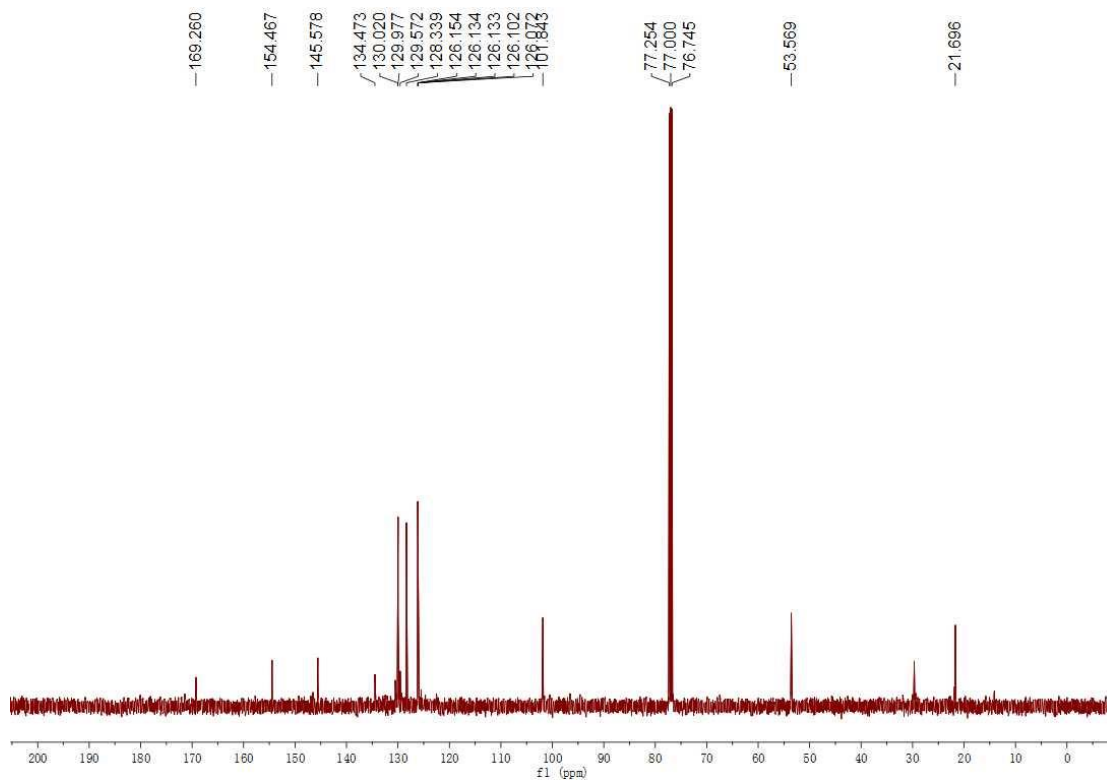

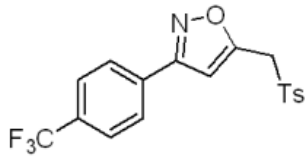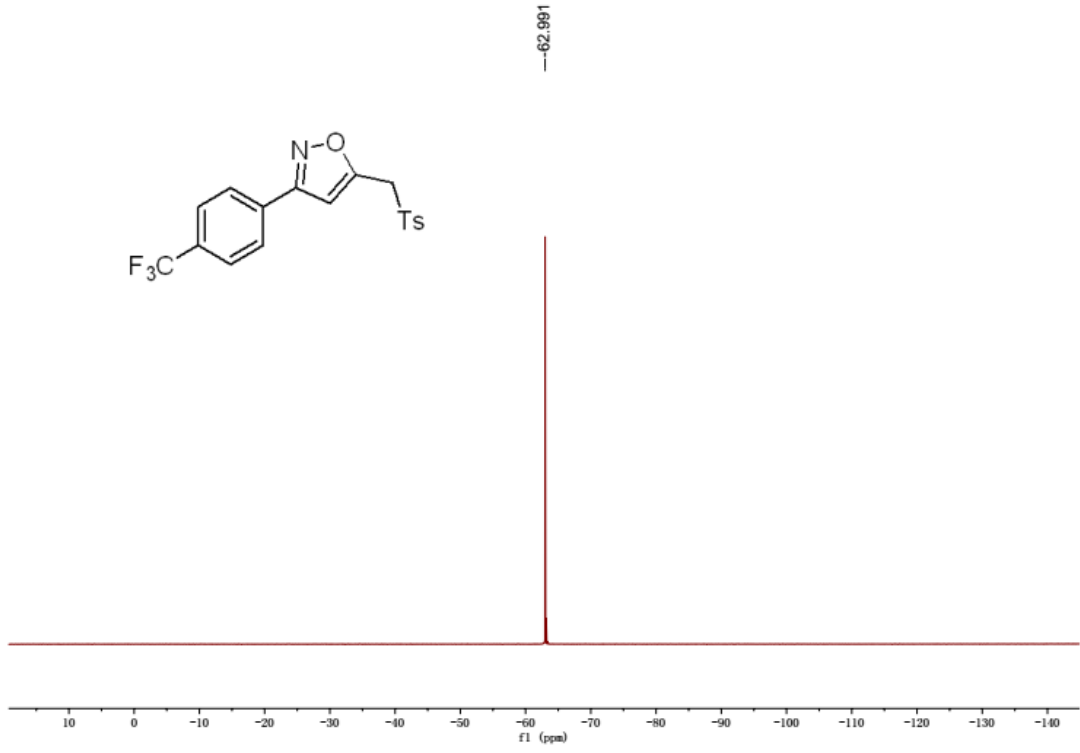

### 3-(naphthalen-2-yl)-5-(tosylmethyl)isoxazole (3ja)

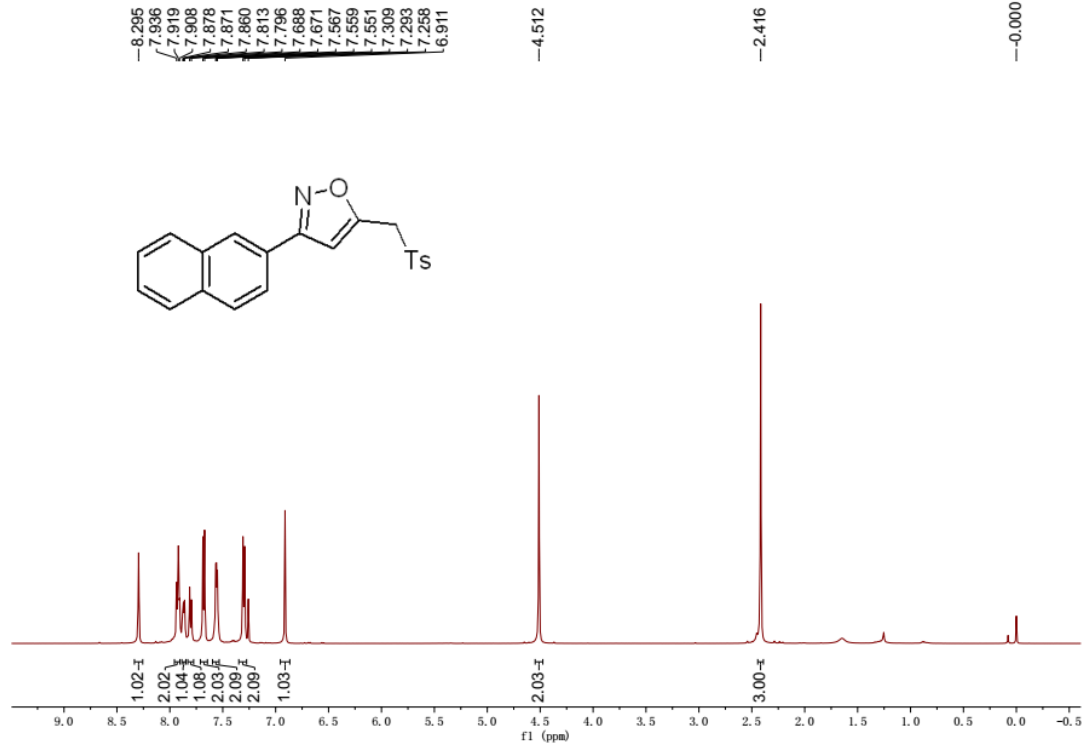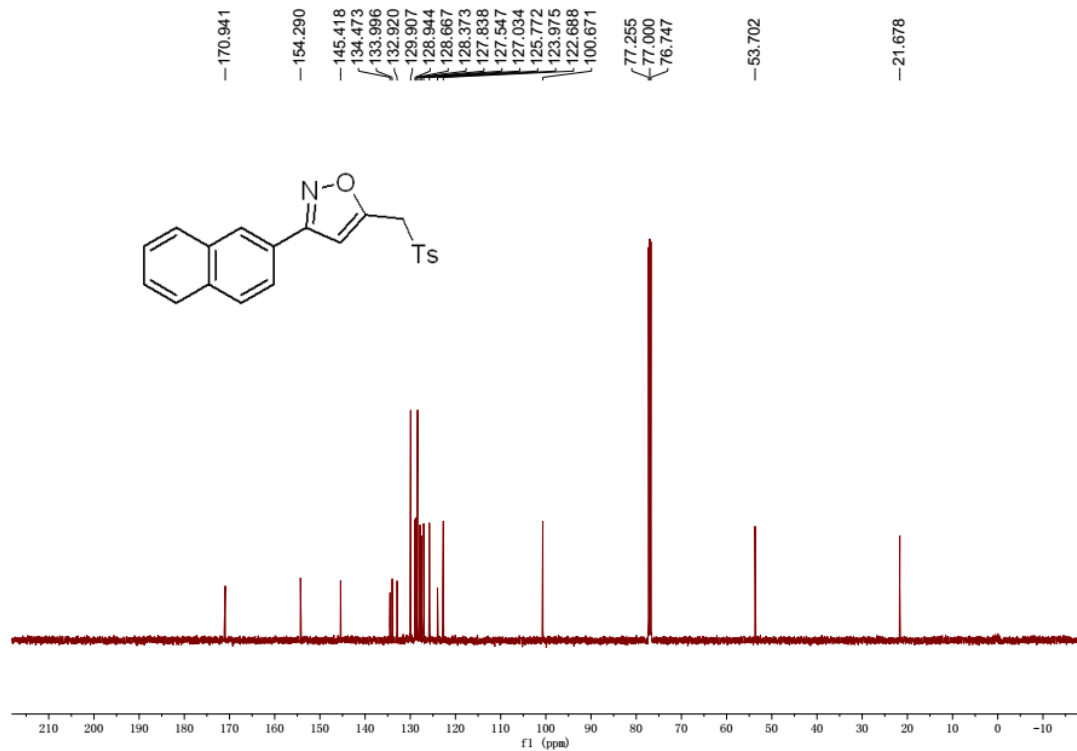

### 3-(pyridin-3-yl)-5-(tosylmethyl)isoxazole (3ka)

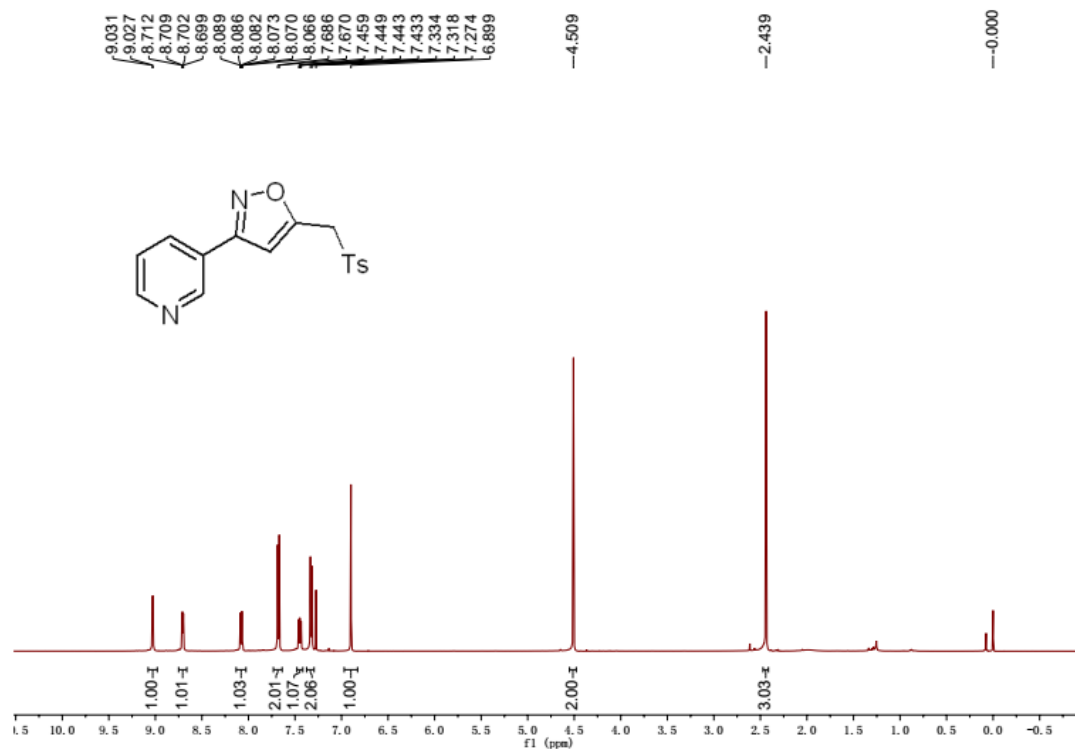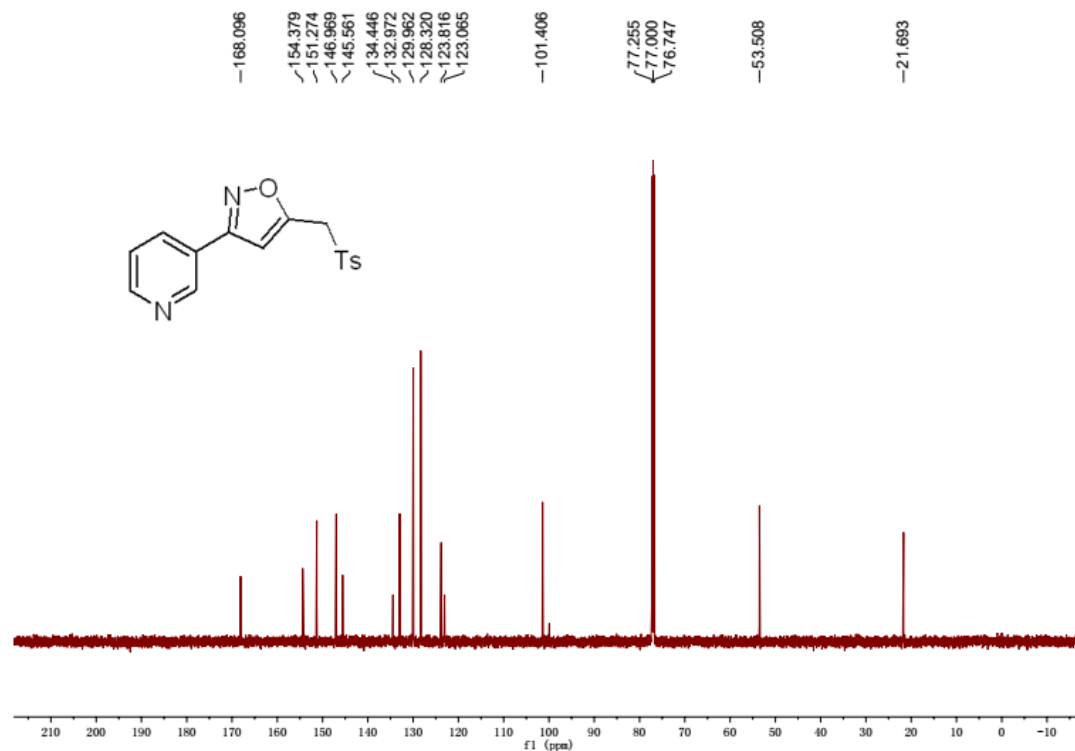

### 3-(pyridin-2-yl)-5-(tosylmethyl)isoxazole (3la)

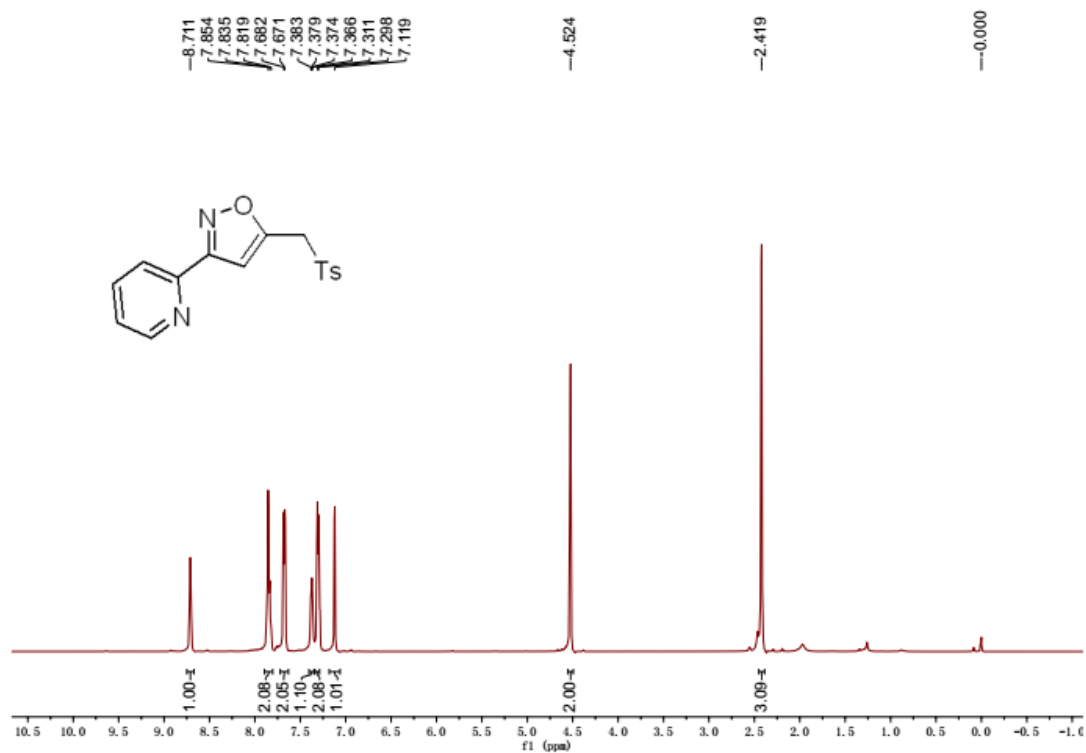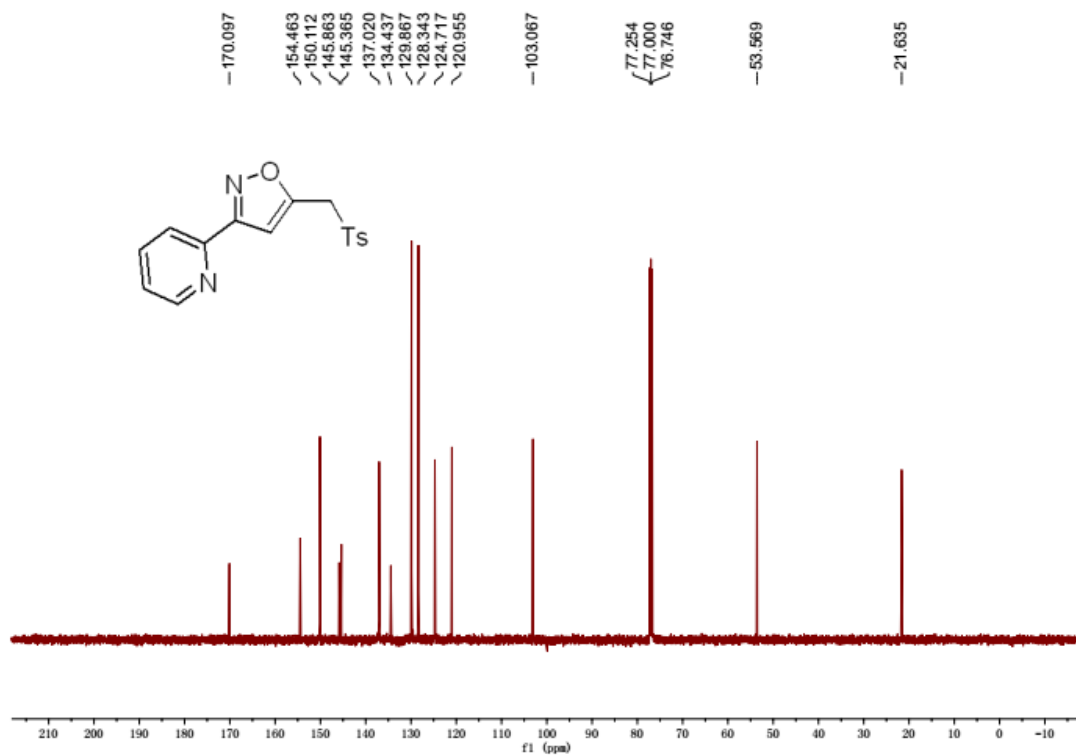



### 3-(thiophen-3-yl)-5-(tosylmethyl)isoxazole (3ma)

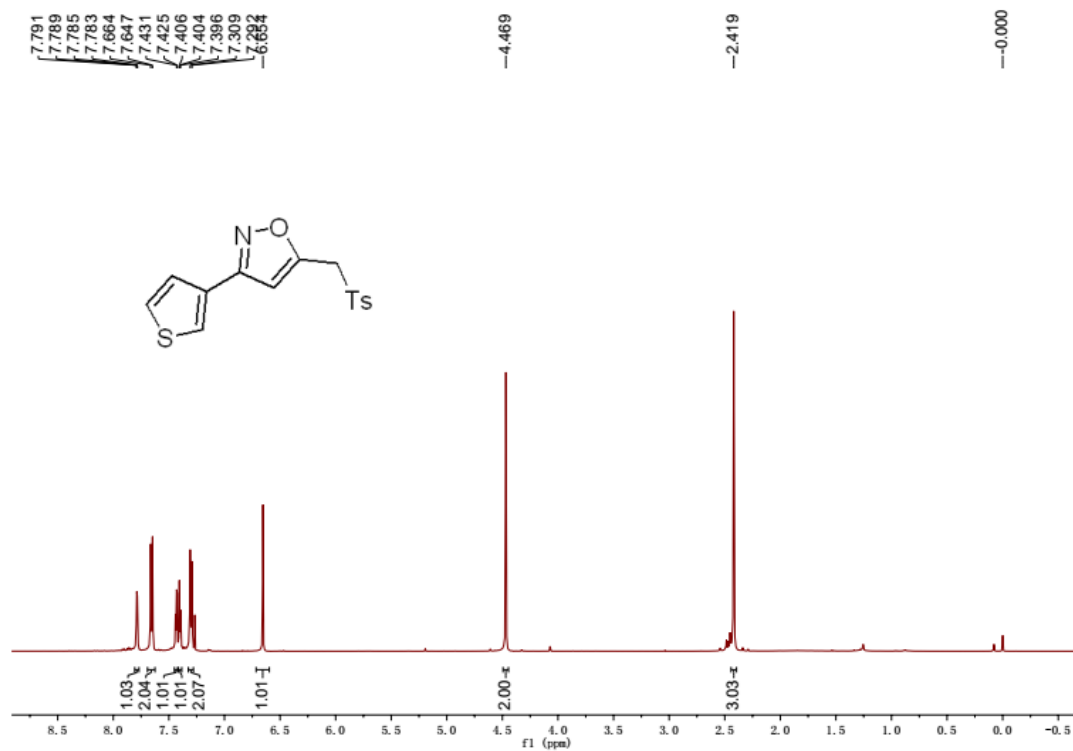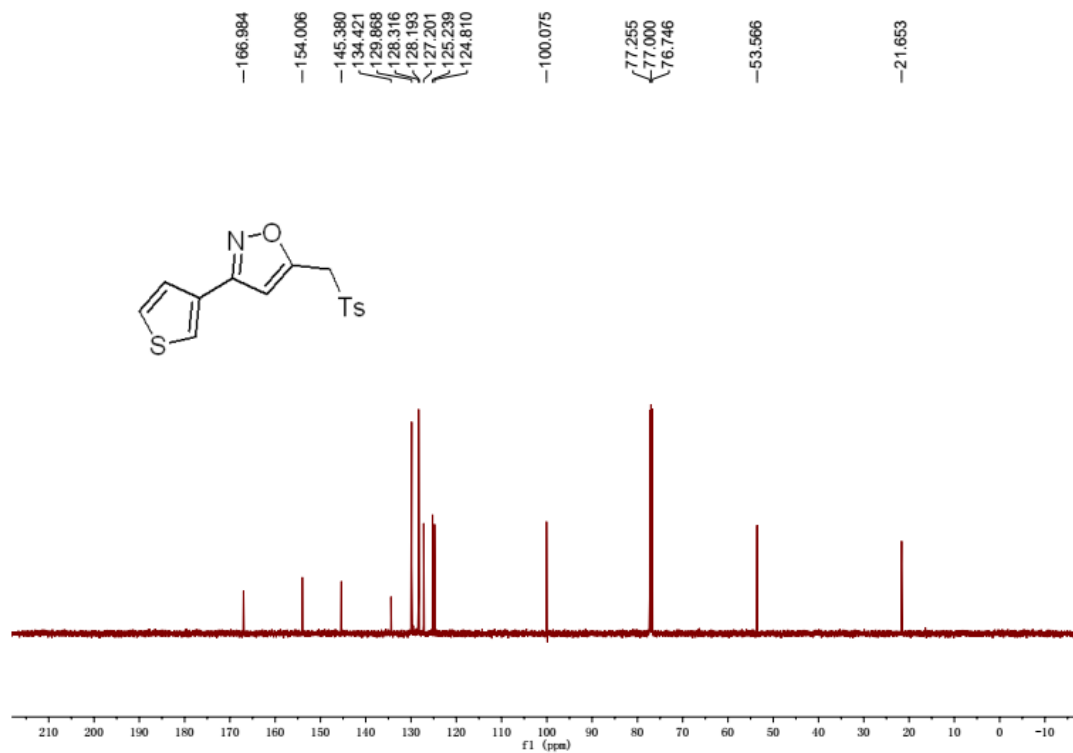

# Product (3na)

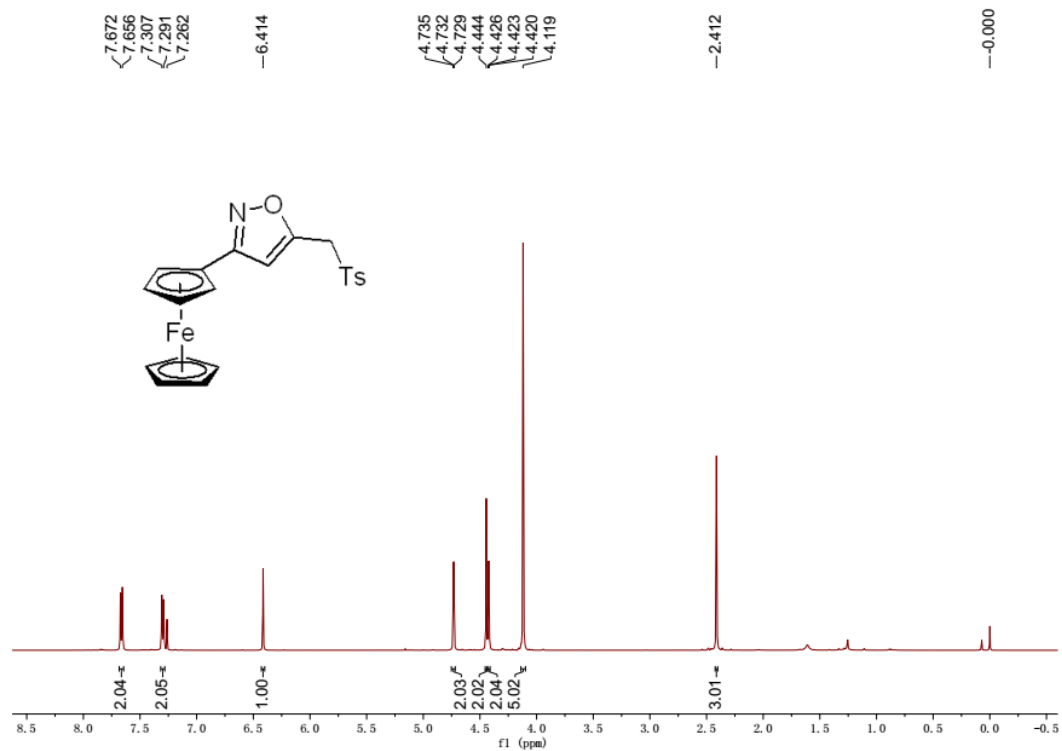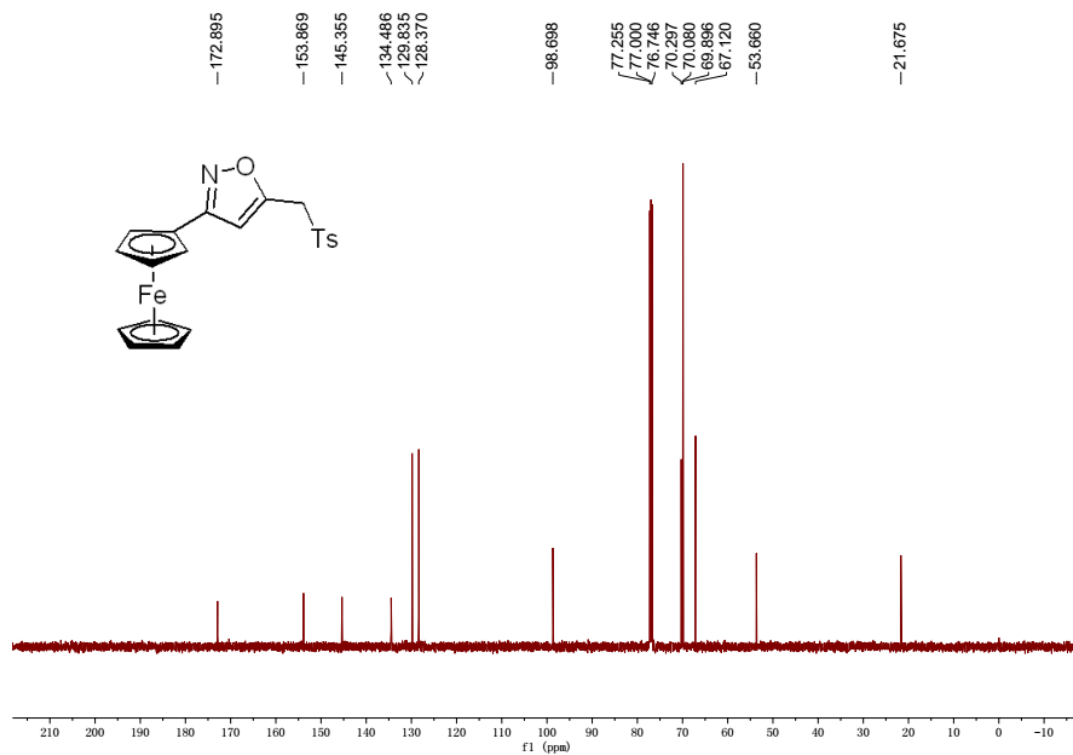

(5-(tosylmethyl)isoxazol-3-yl)methyl benzoate (30a)

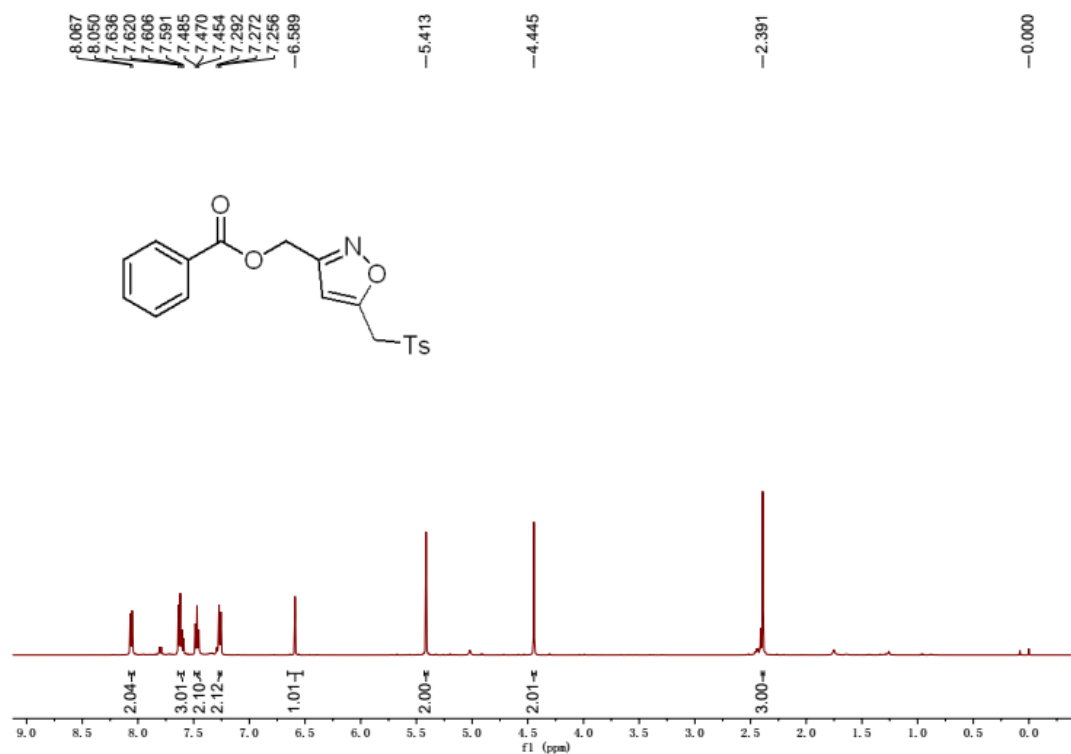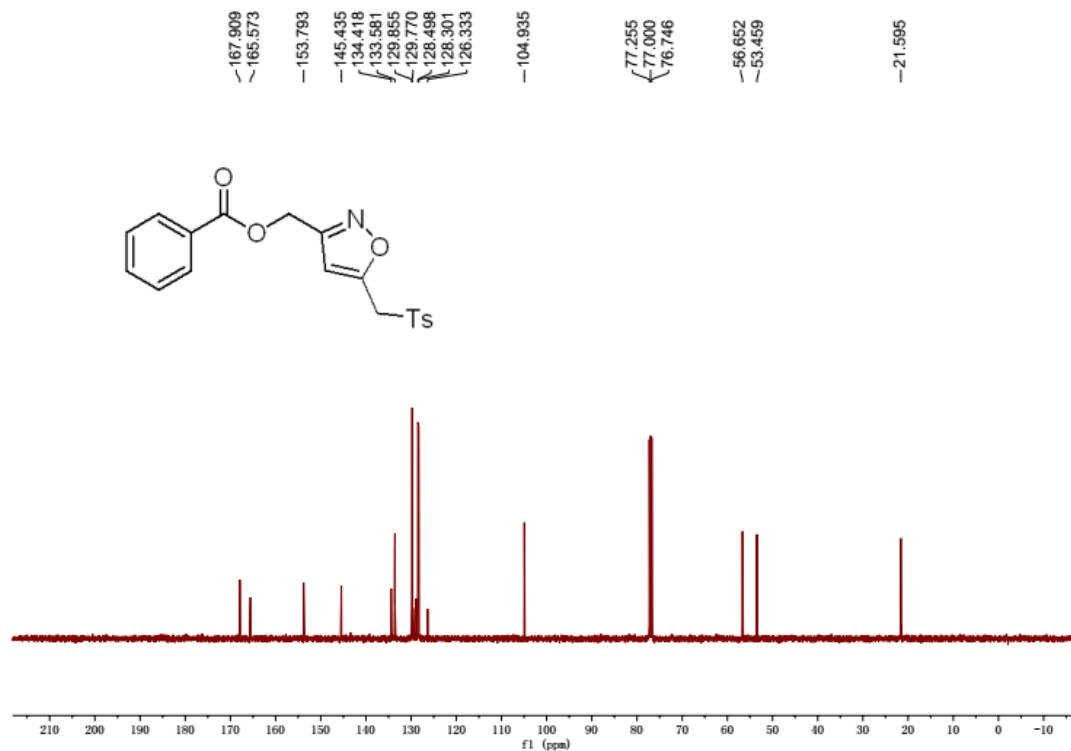

# 3-(5-(tosylmethyl)isoxazol-3-yl)propyl benzoate

(3pa)

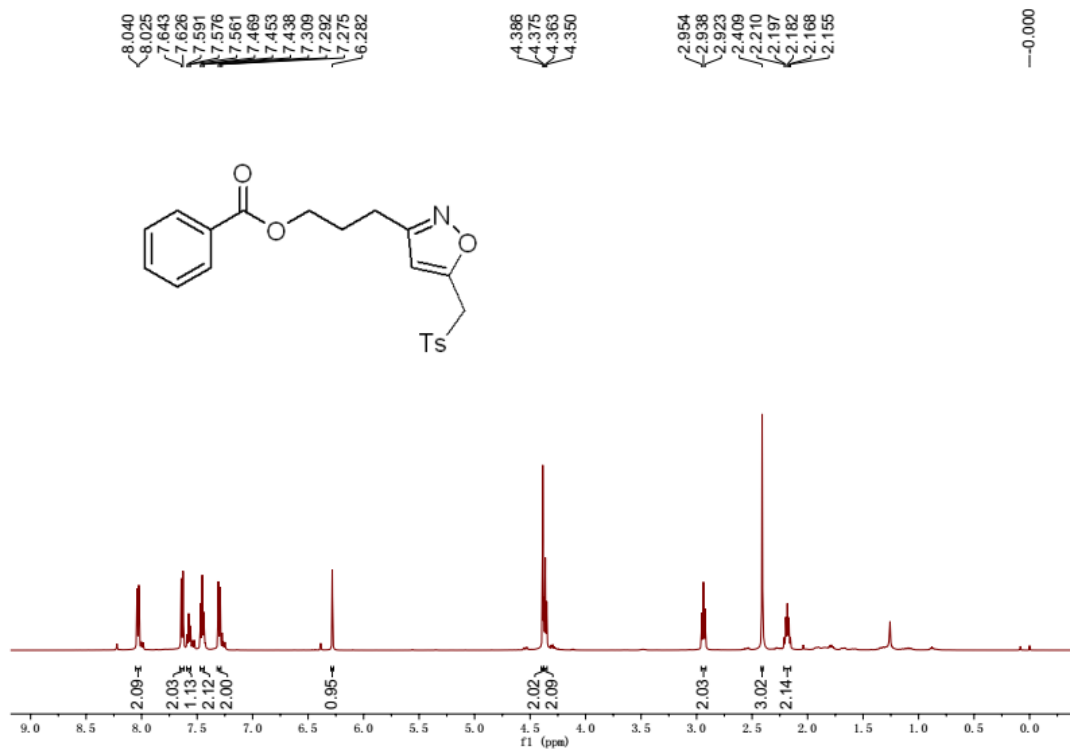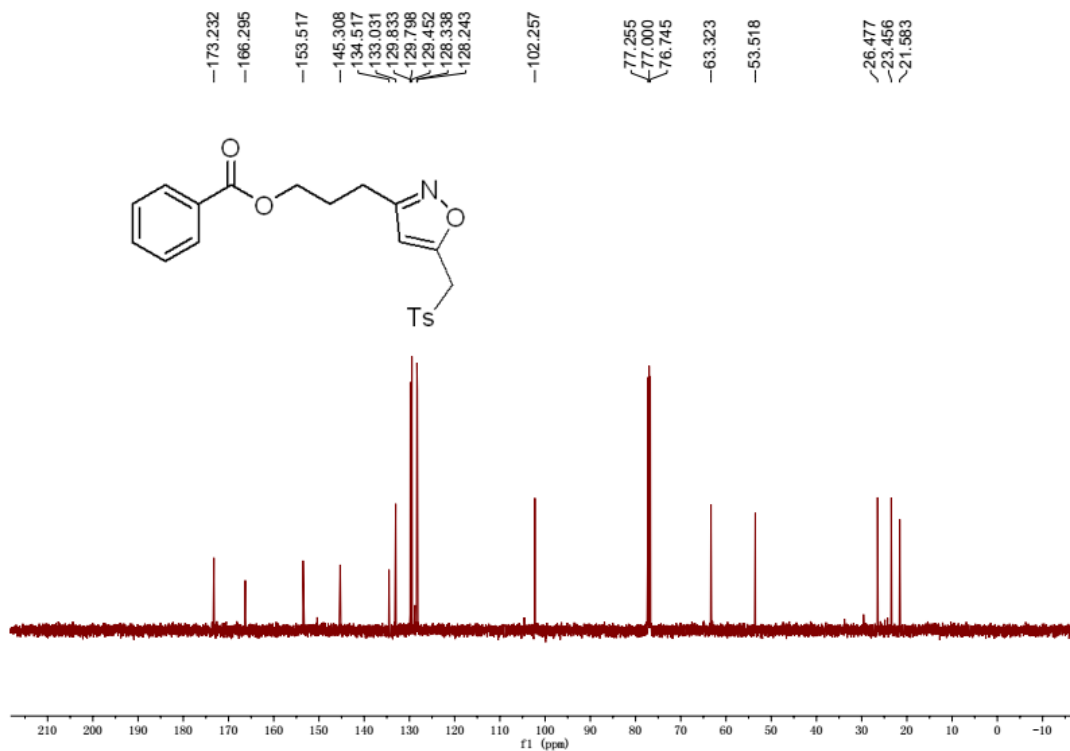

# 3-phenyl-5-(1-tosylethyl)isoxazole

(3qa)

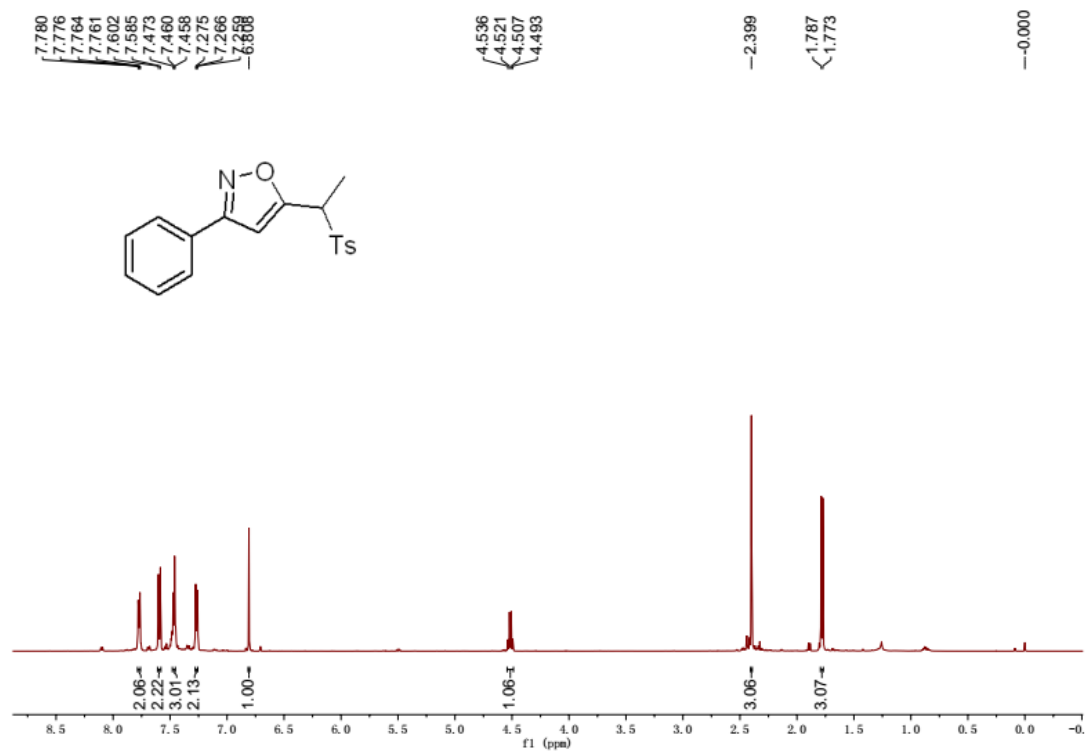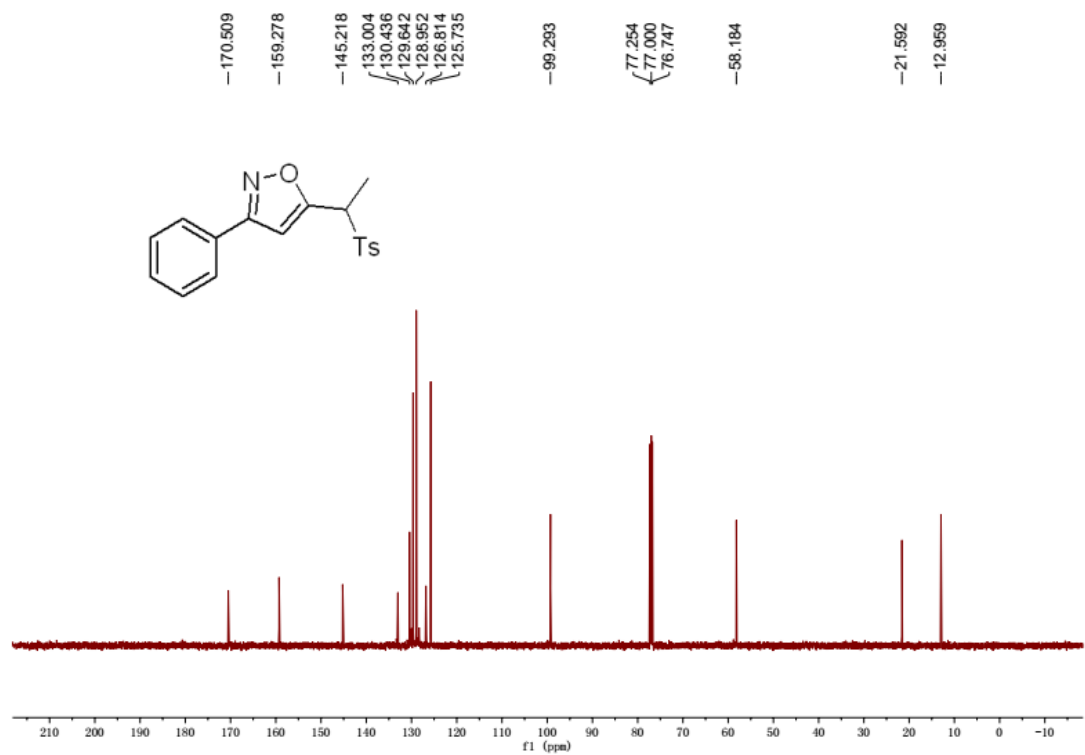

# 4-(5-(tosylmethyl)isoxazol-3-yl)benzyl *N*-(tert-butoxycarbonyl)-*N*-methylglycine

-te (3ra)

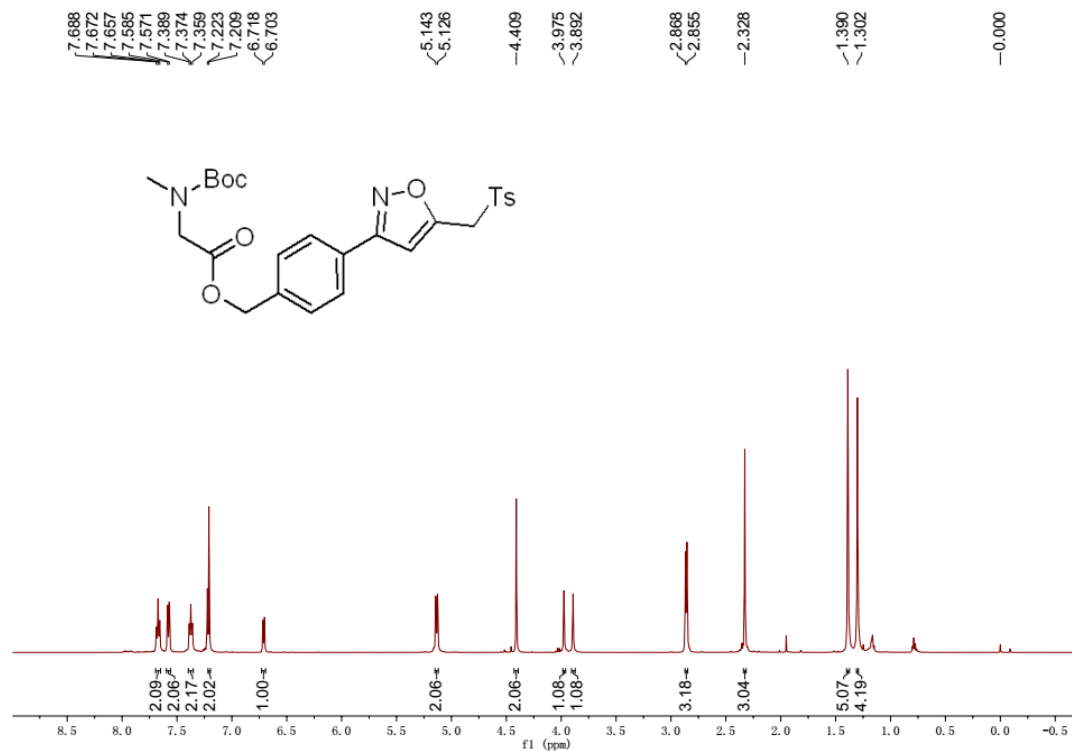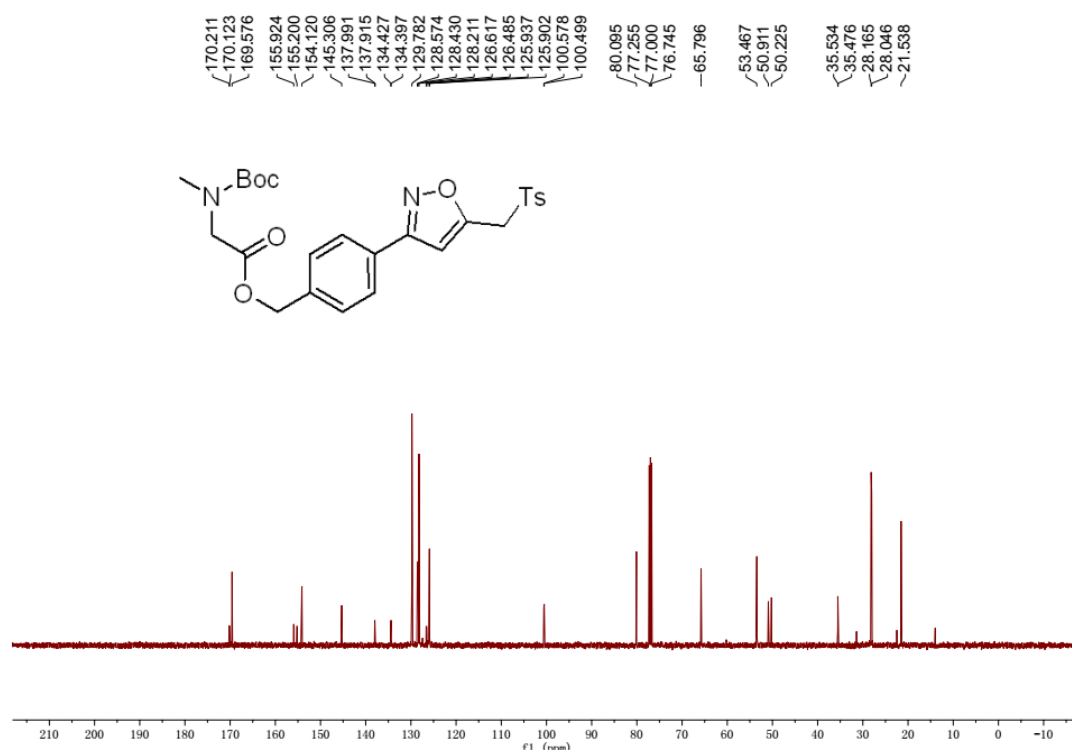

### 4-(5-(tosylmethyl)isoxazol-3-yl)benzyl 2-(4-isobutylphenyl)propanoate (3sa)

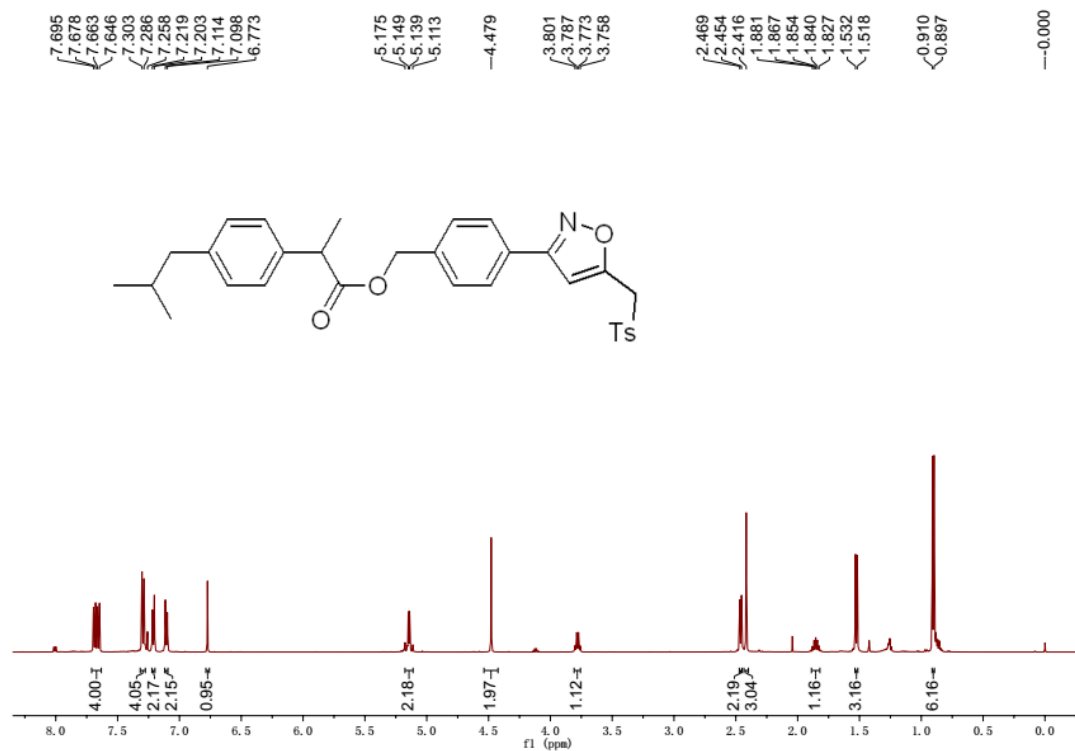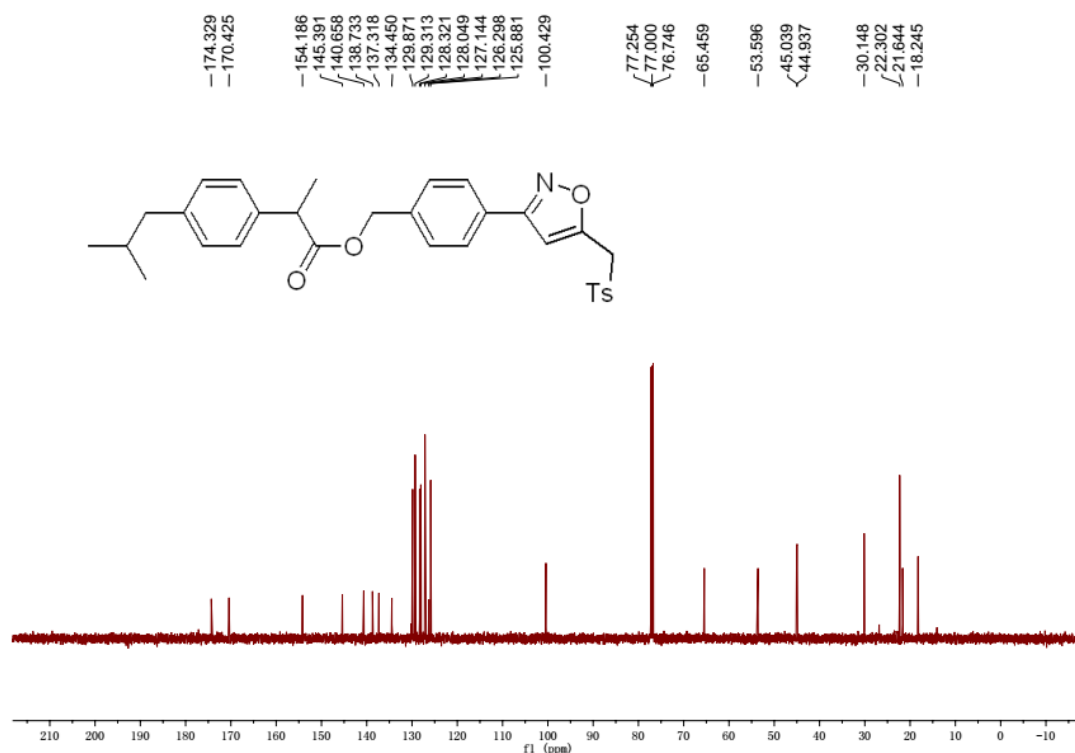

### 3-phenyl-5-((phenylsulfonyl)methyl)isoxazole (3ab)

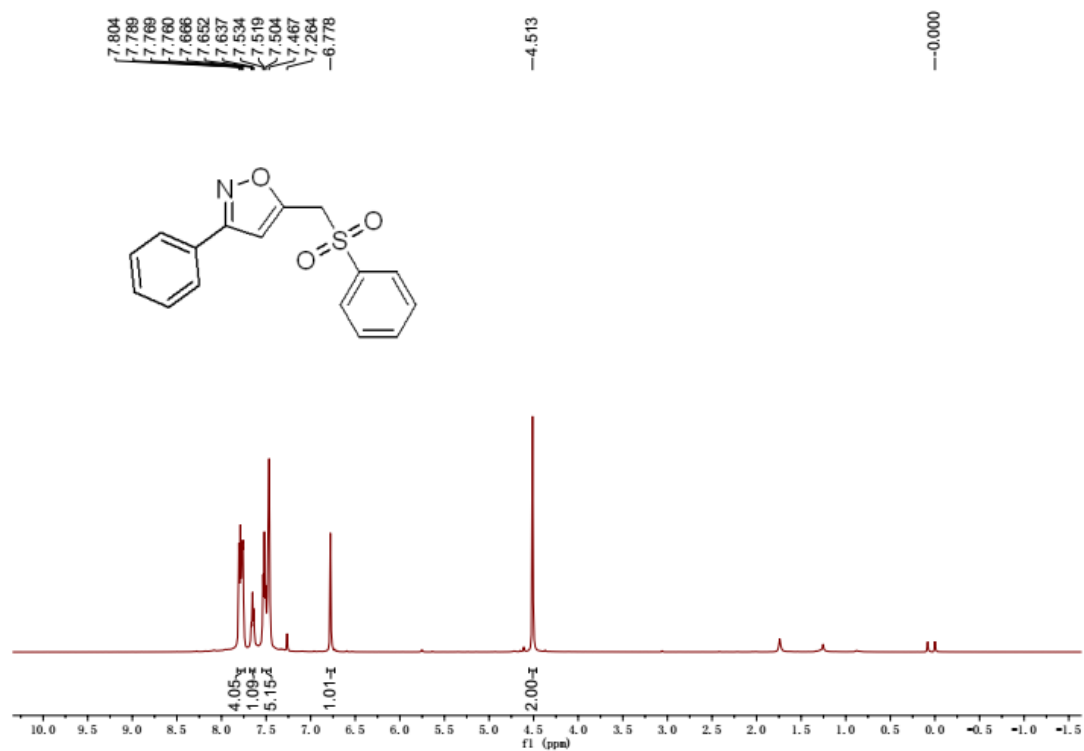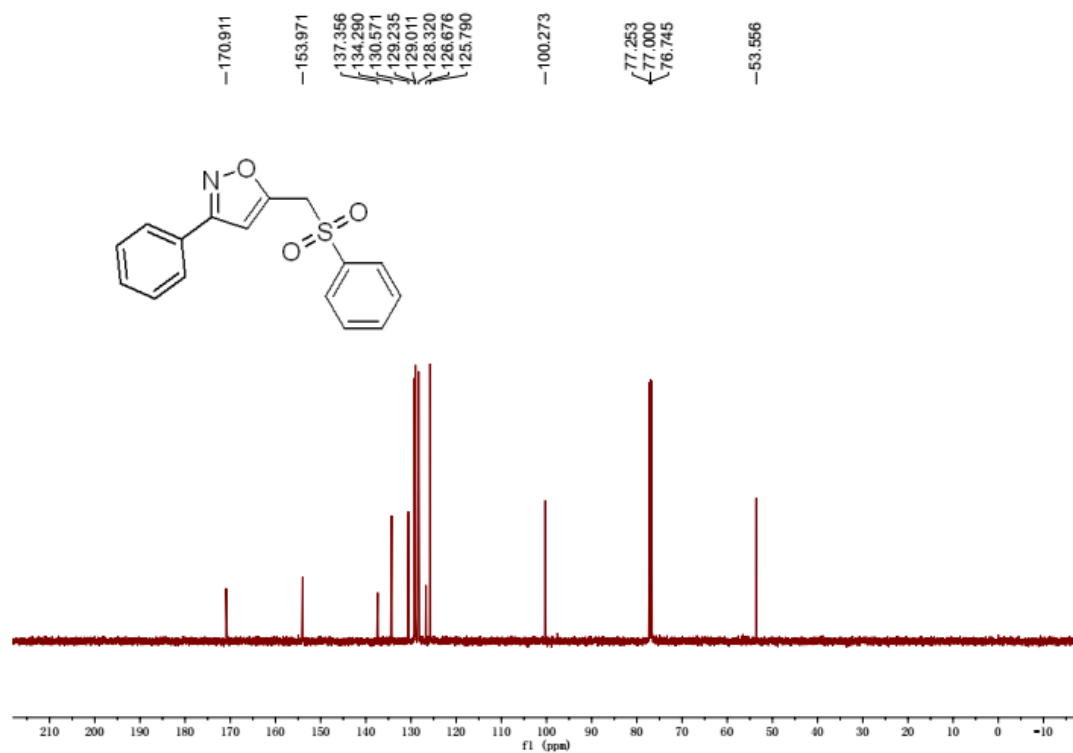



### 5-(((4-methoxyphenyl)sulfonyl)methyl)-3-phenylisoxazole (3ac)

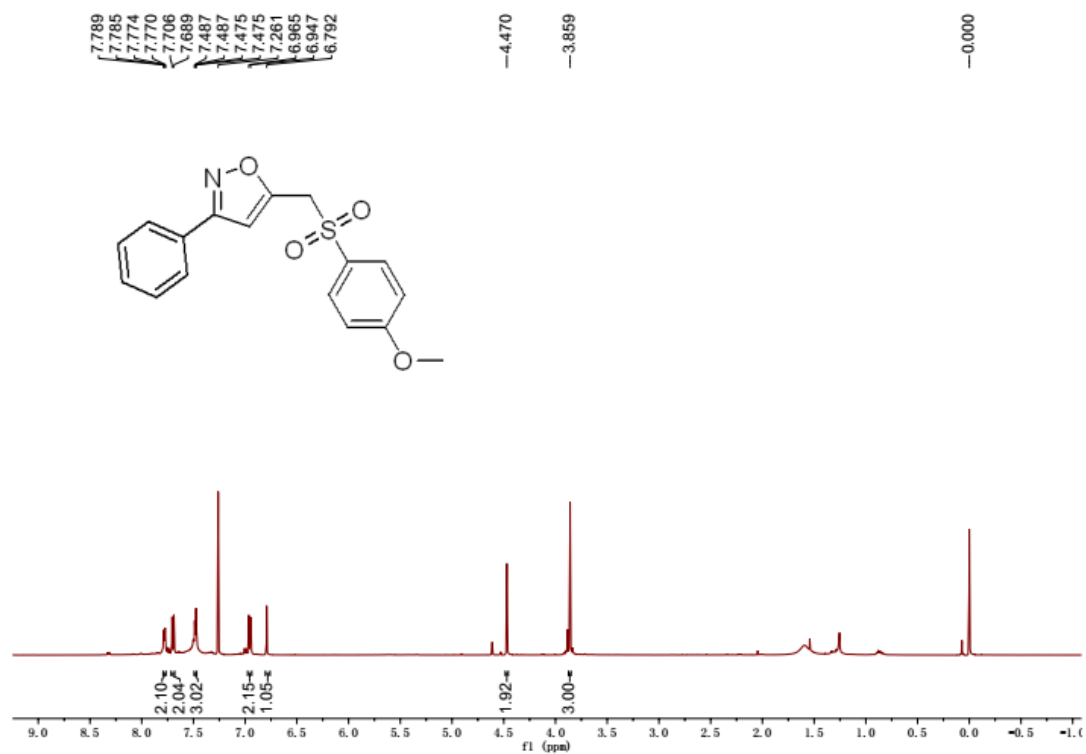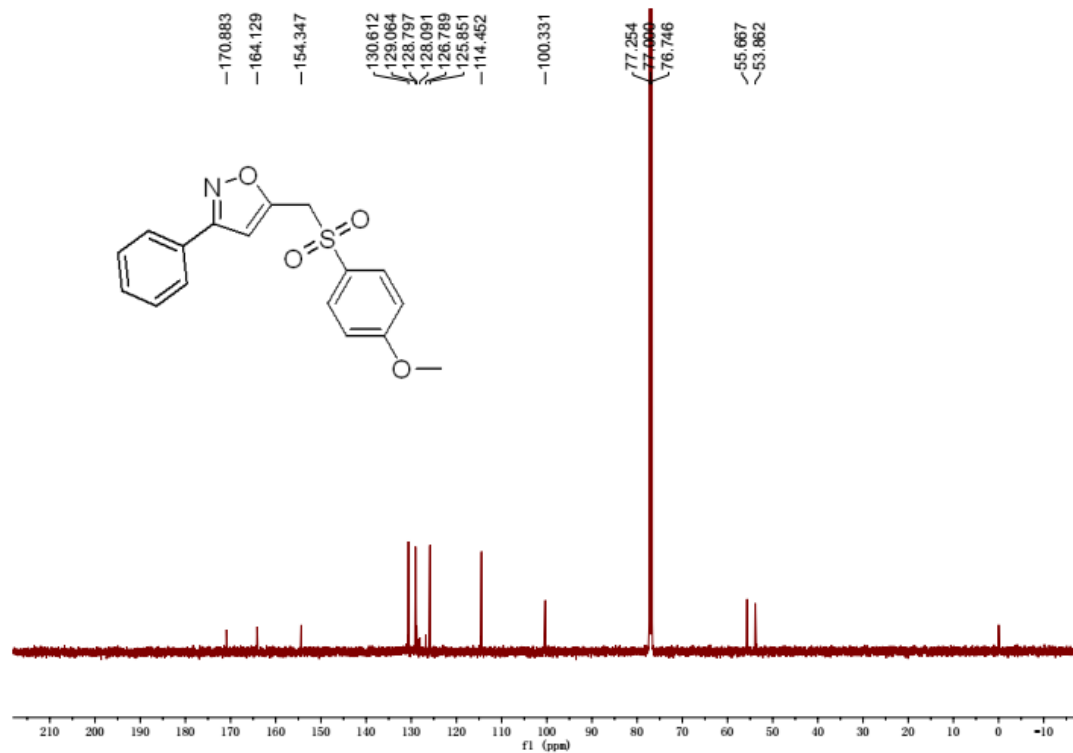

### 5-(((4-fluorophenyl)sulfonyl)methyl)-3-phenylisoxazole (3ad)

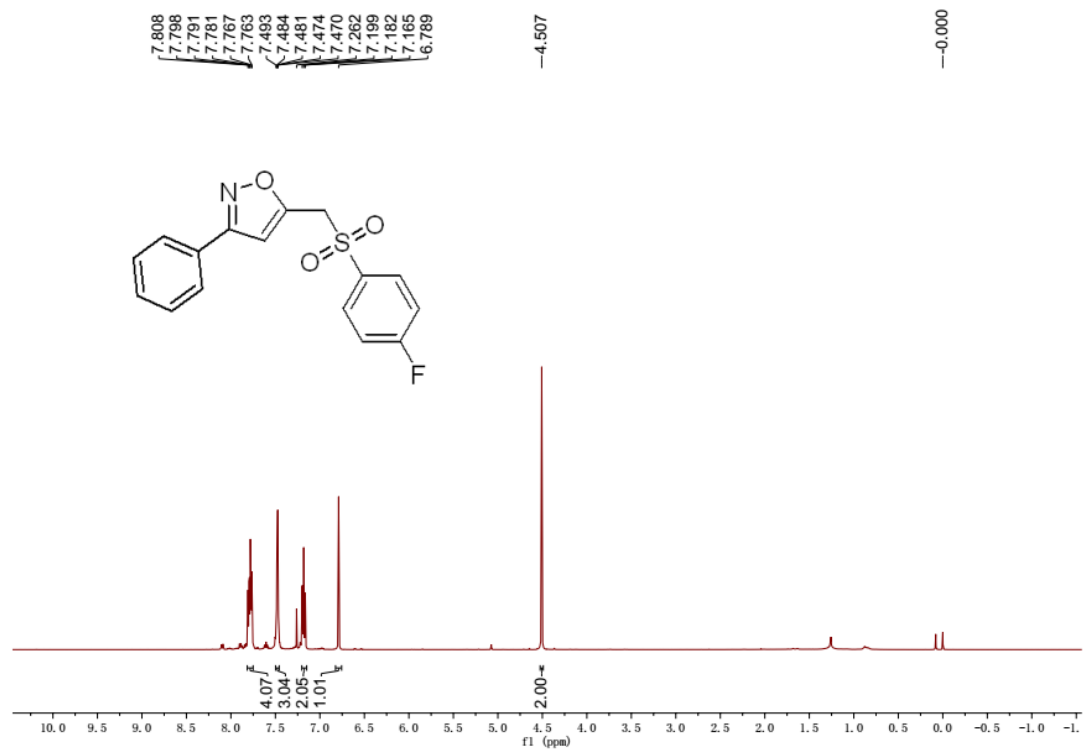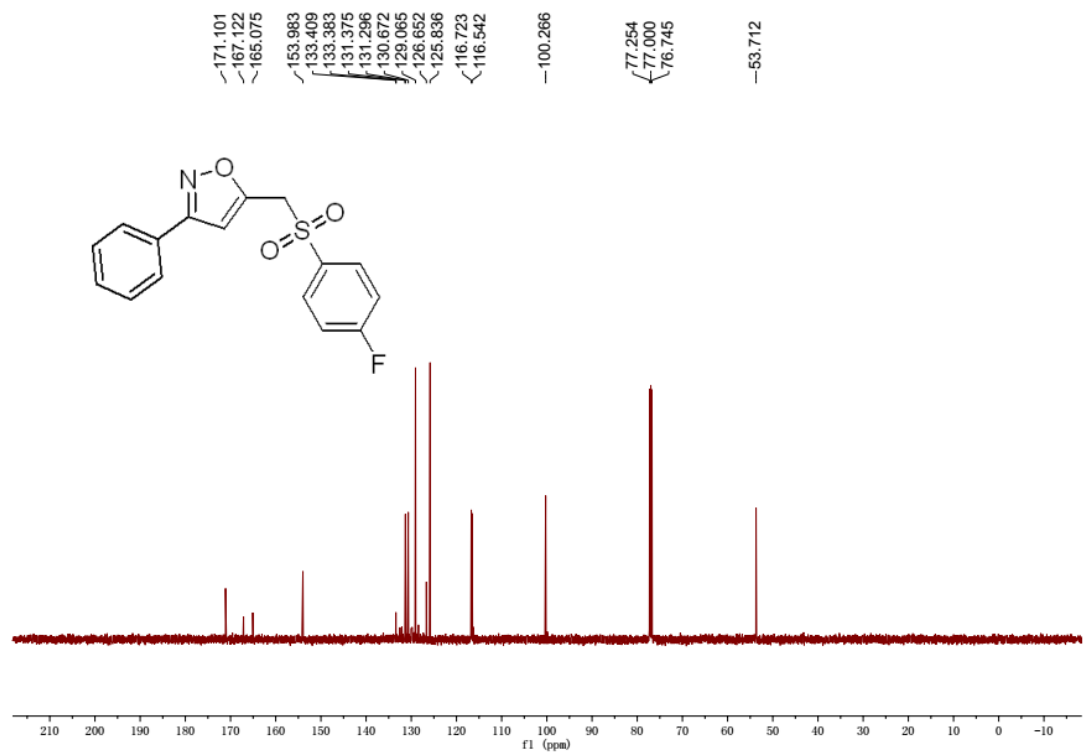



### 5-(((4-chlorophenyl)sulfonyl)methyl)-3-phenylisoxazole (3ae)

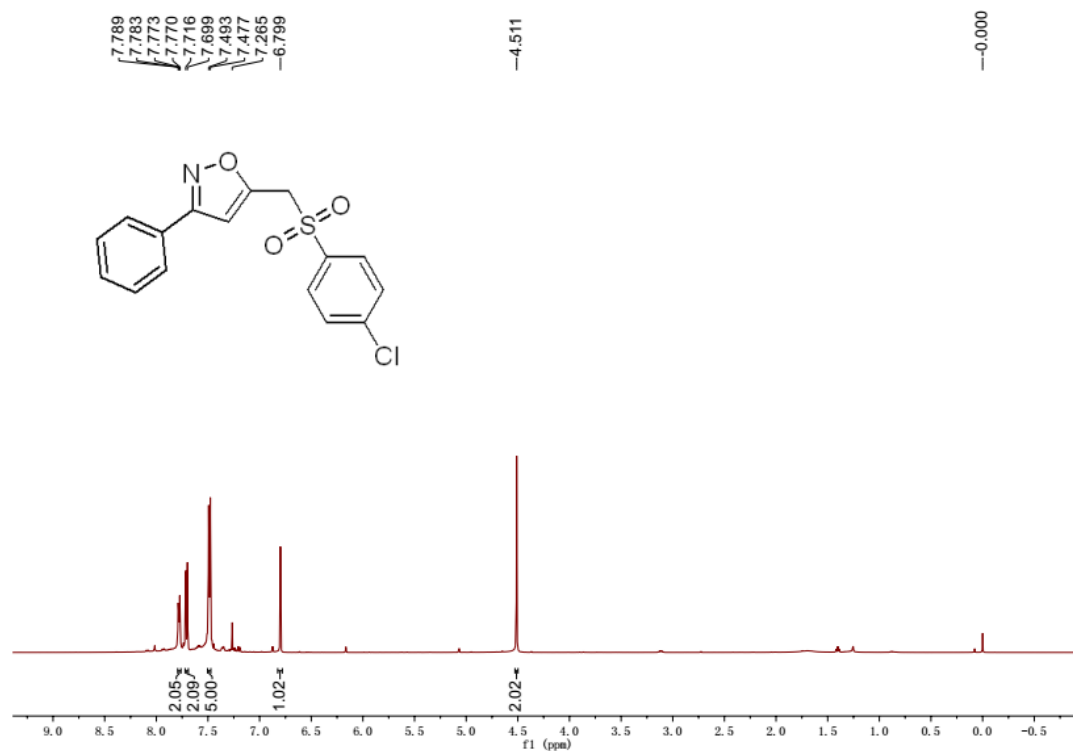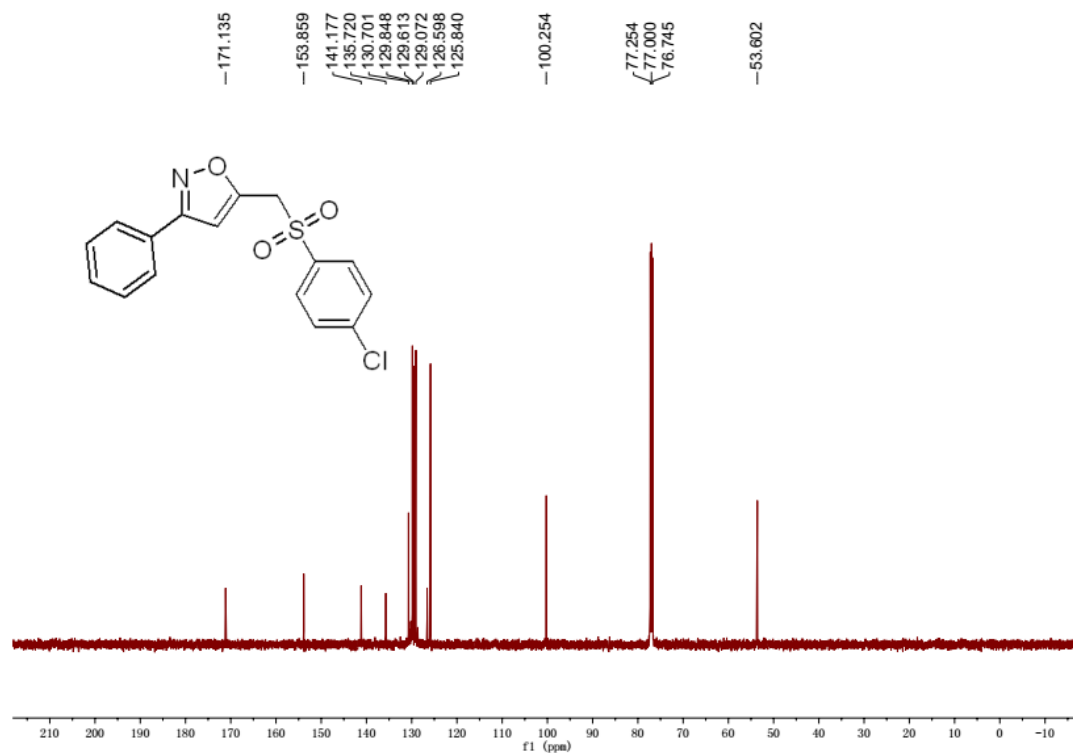

### 5-(((4-bromophenyl)sulfonyl)methyl)-3-phenylisoxazole (3af)

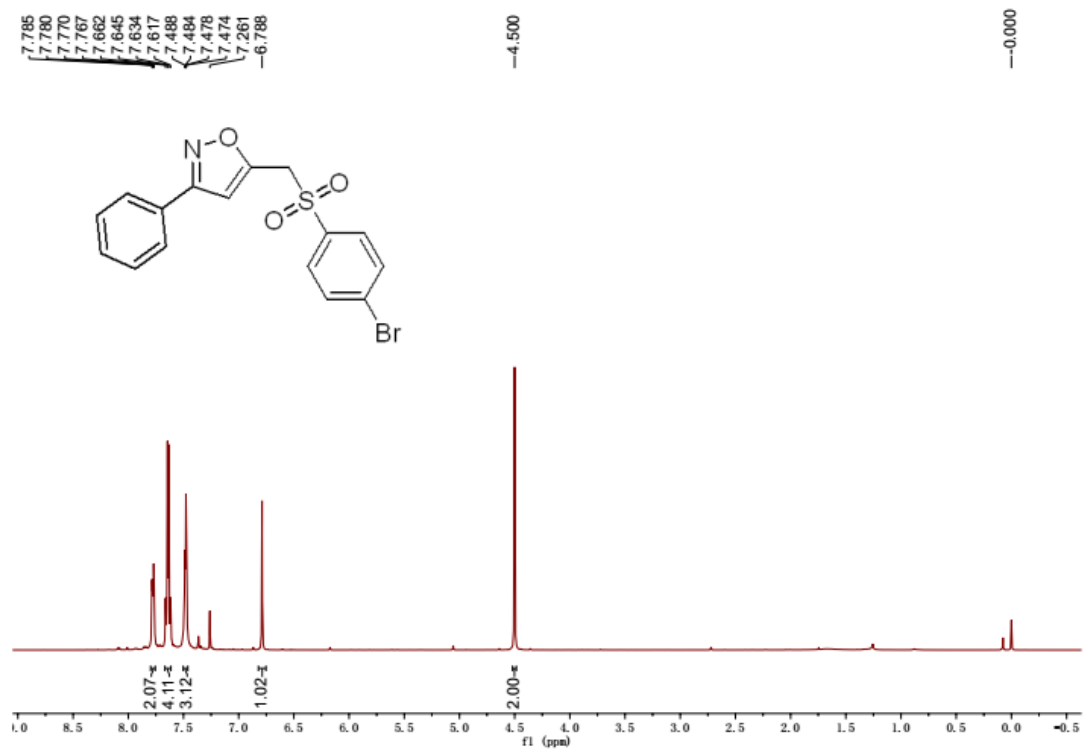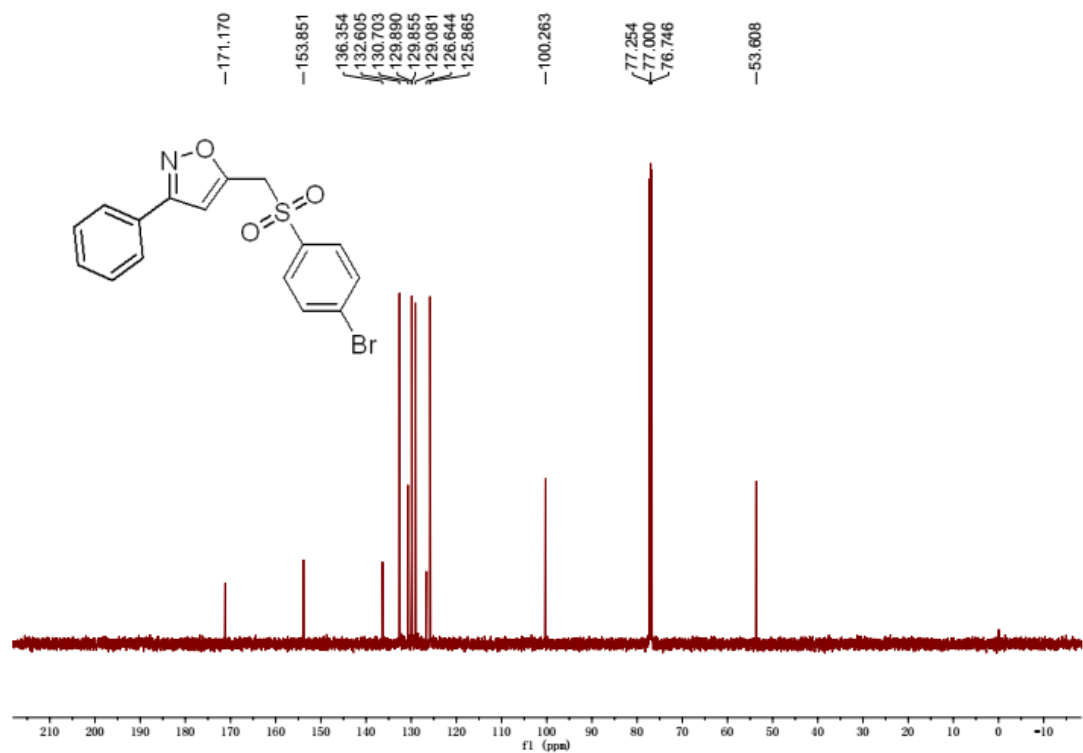

### 5-(((4-nitrophenyl)sulfonyl)methyl)-3-phenylisoxazole (3ag)

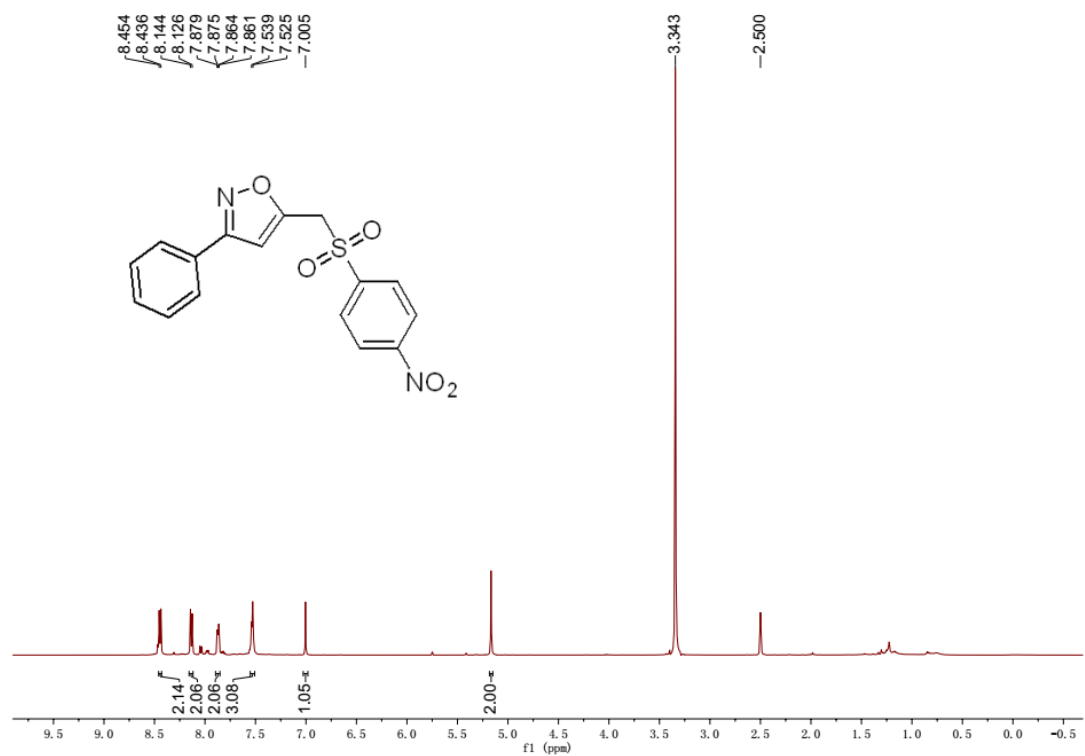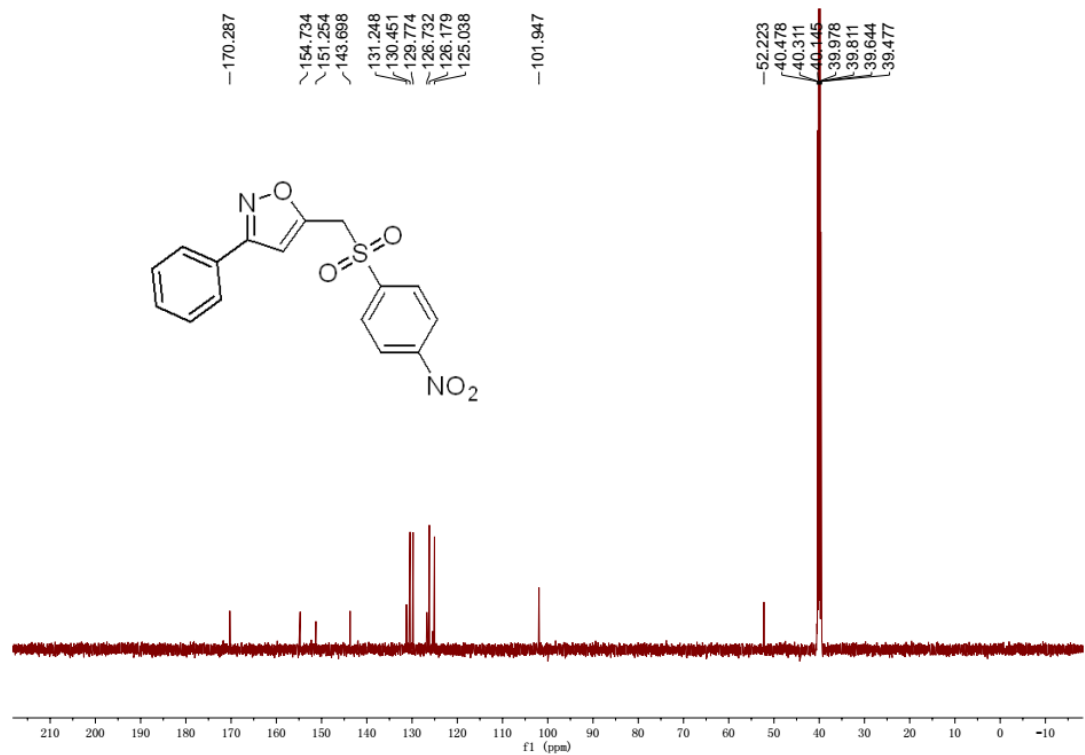

### 5-(((3-chlorophenyl)sulfonyl)methyl)-3-phenylisoxazole (3ah)

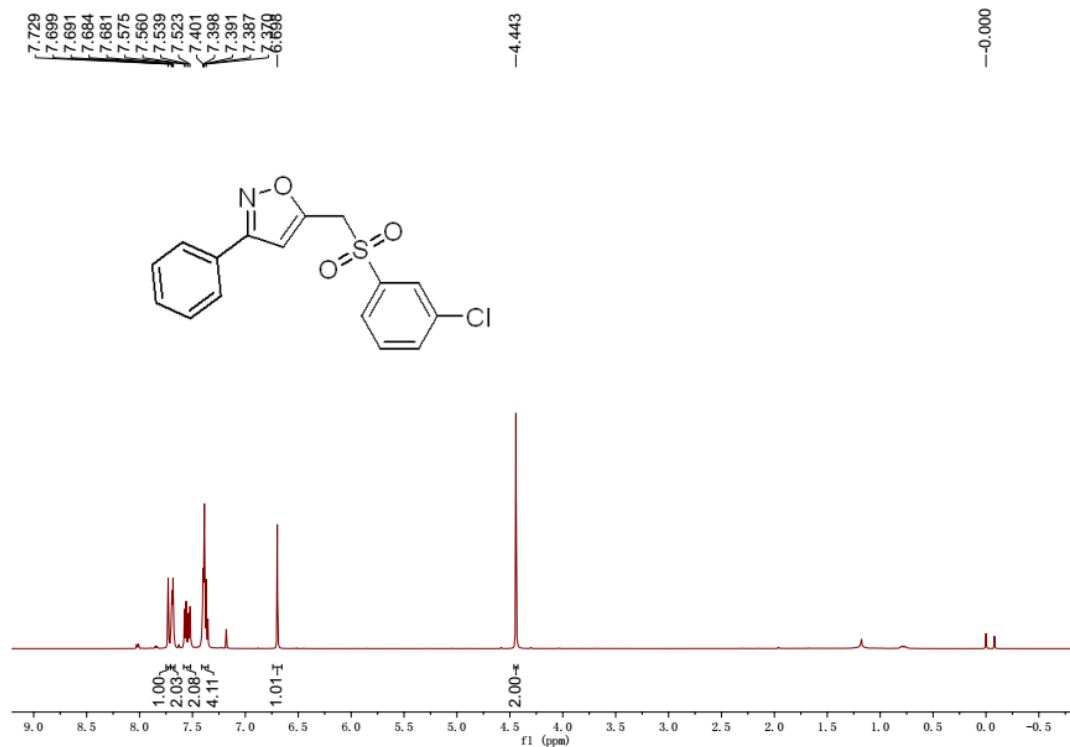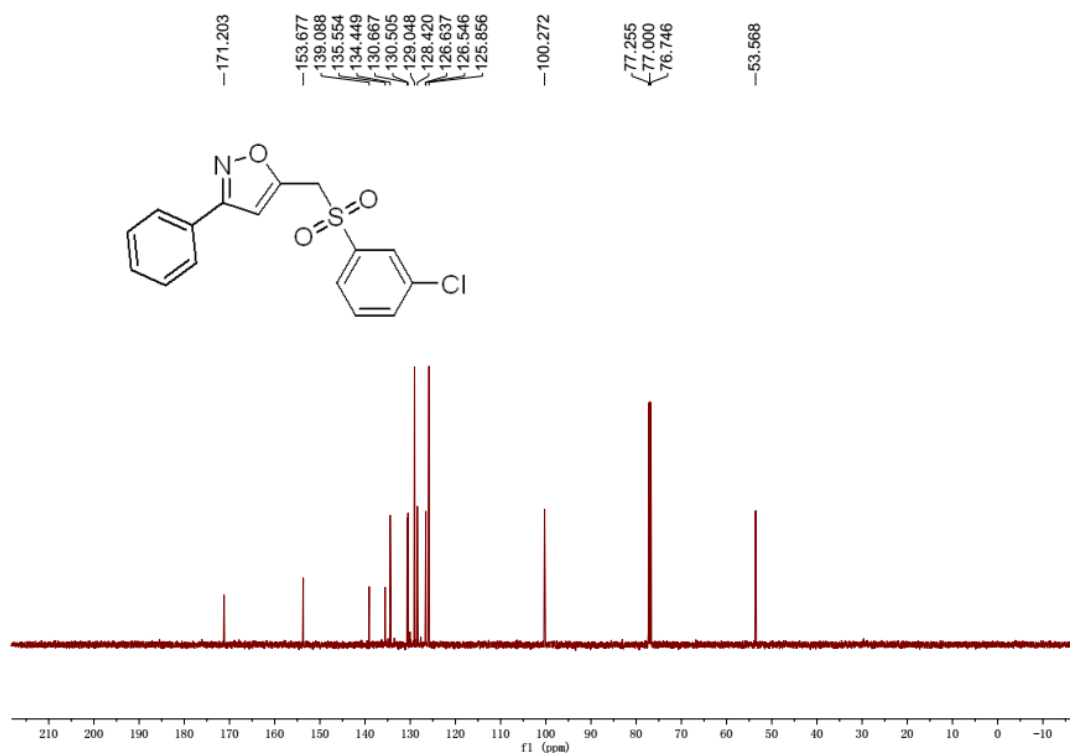

# 5-(((2-chlorophenyl)sulfonyl)methyl)-3-phenylisoxazole

(3ai)

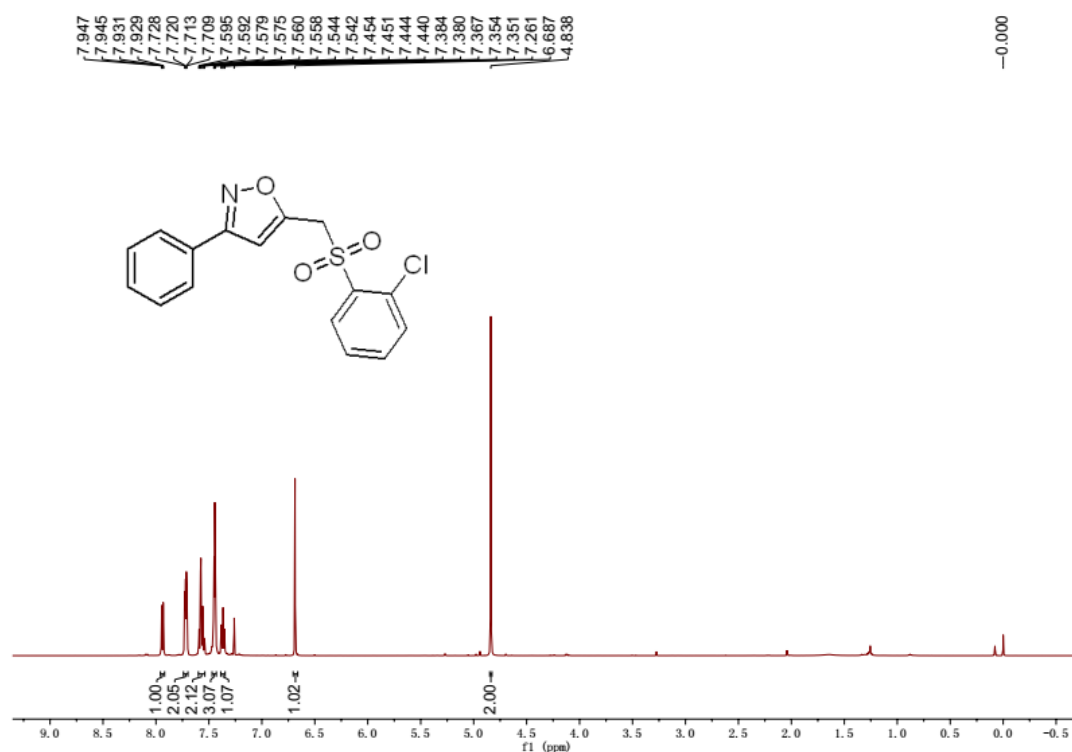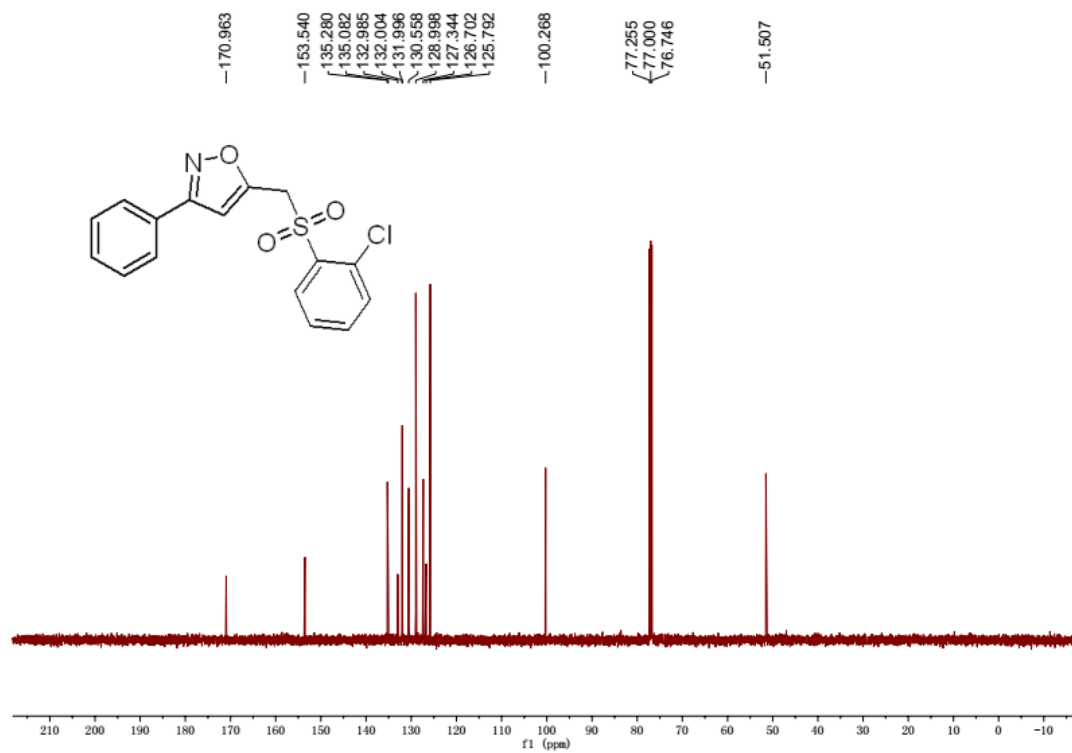



### 3-phenyl-5-(((2,4,6-trichlorophenyl)sulfonyl)methyl)isoxazole (3aj)

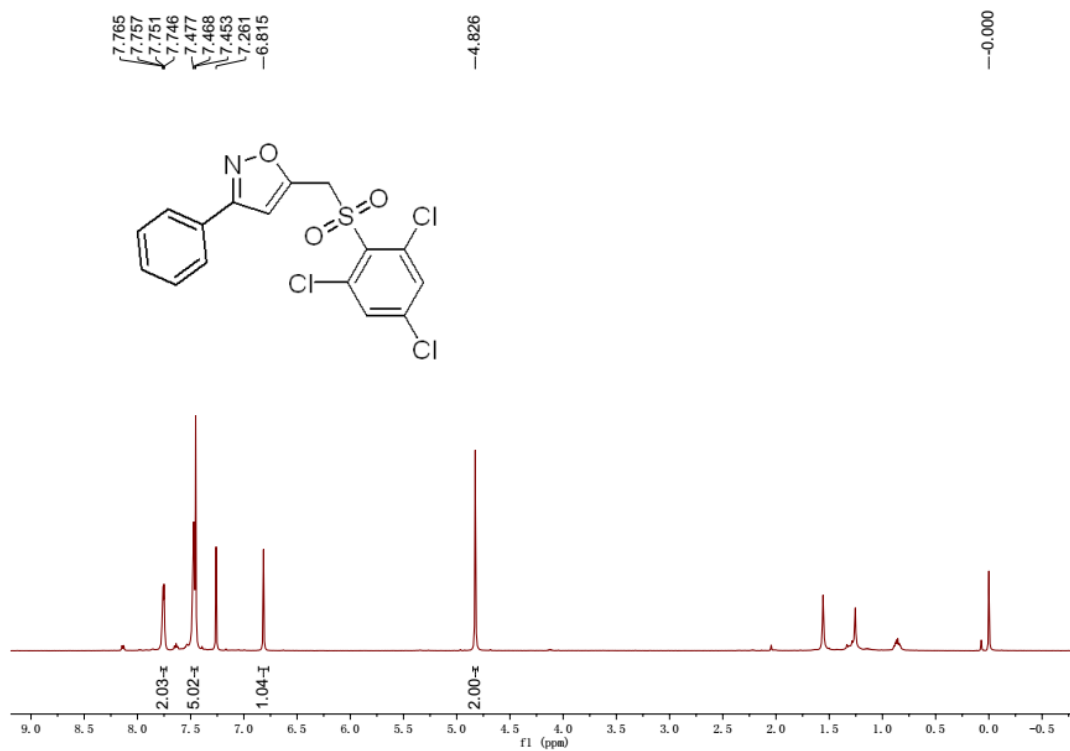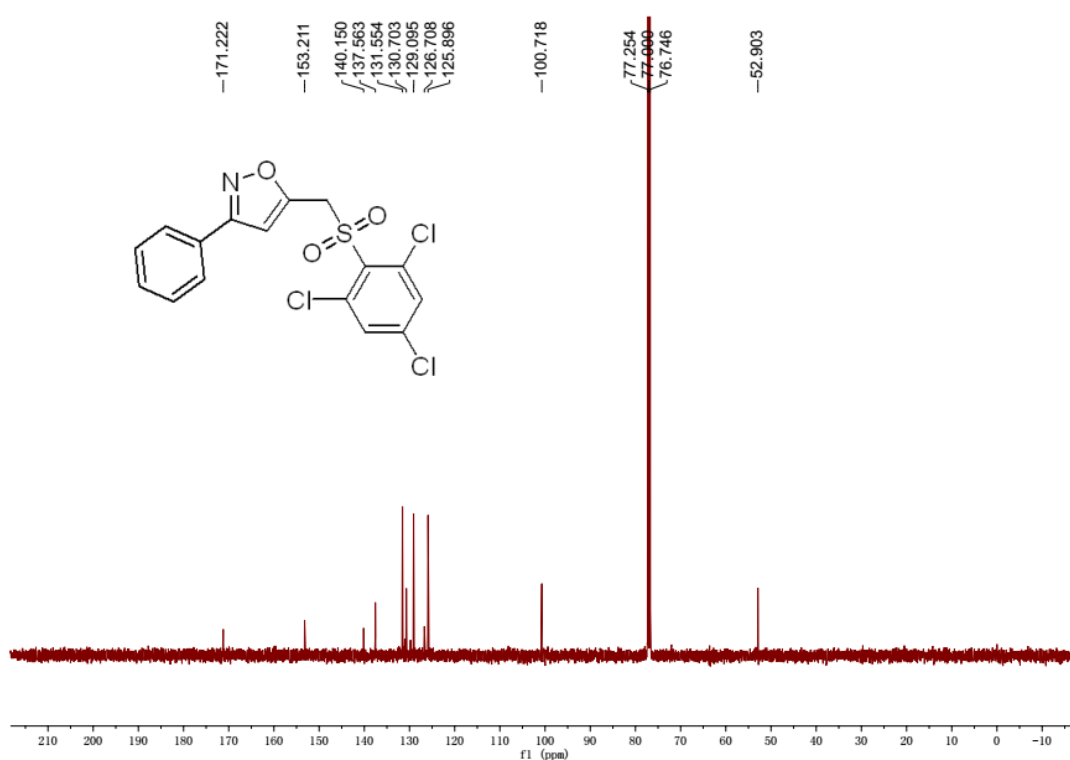

### 5-(((2,3-dihydrobenzofuran-5-yl)sulfonyl)methyl)-3-phenylisoxazole (3ak)

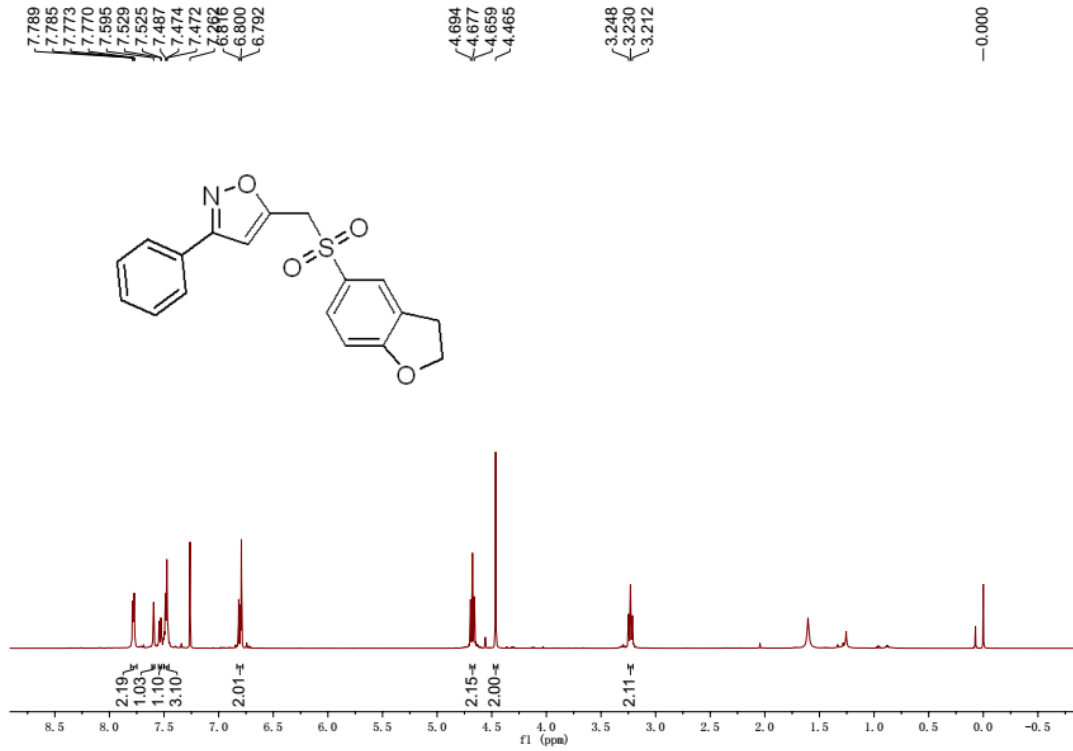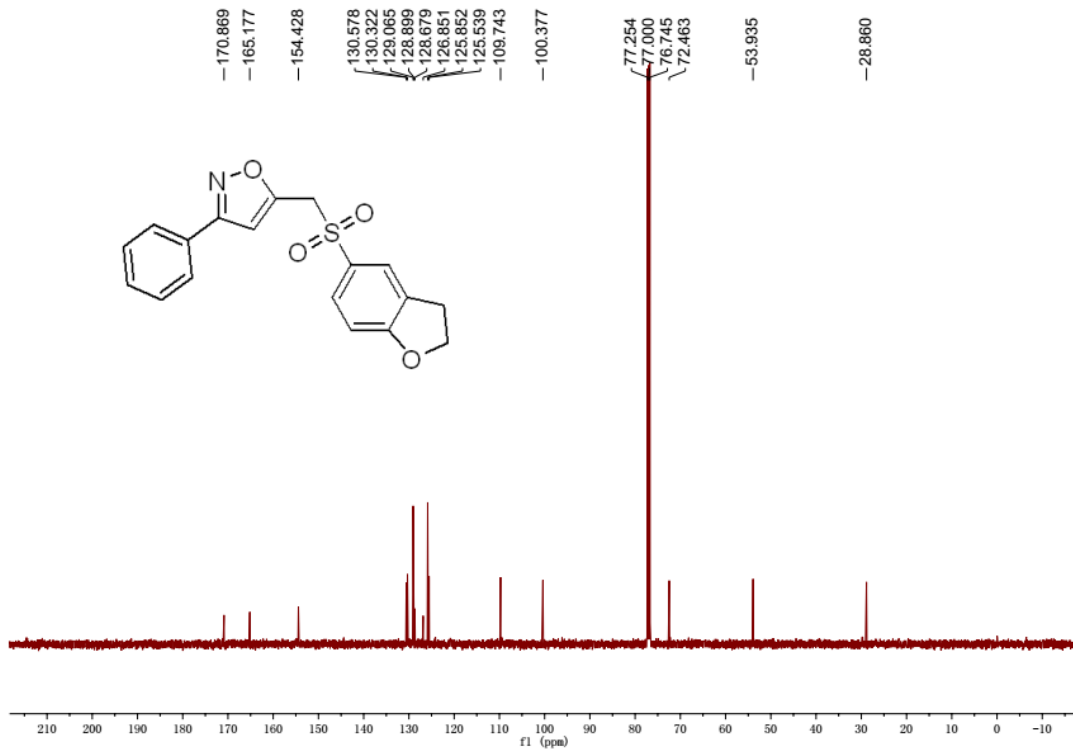

### 5-((naphthalen-2-ylsulfonyl)methyl)-3-phenylisoxazole (3al)

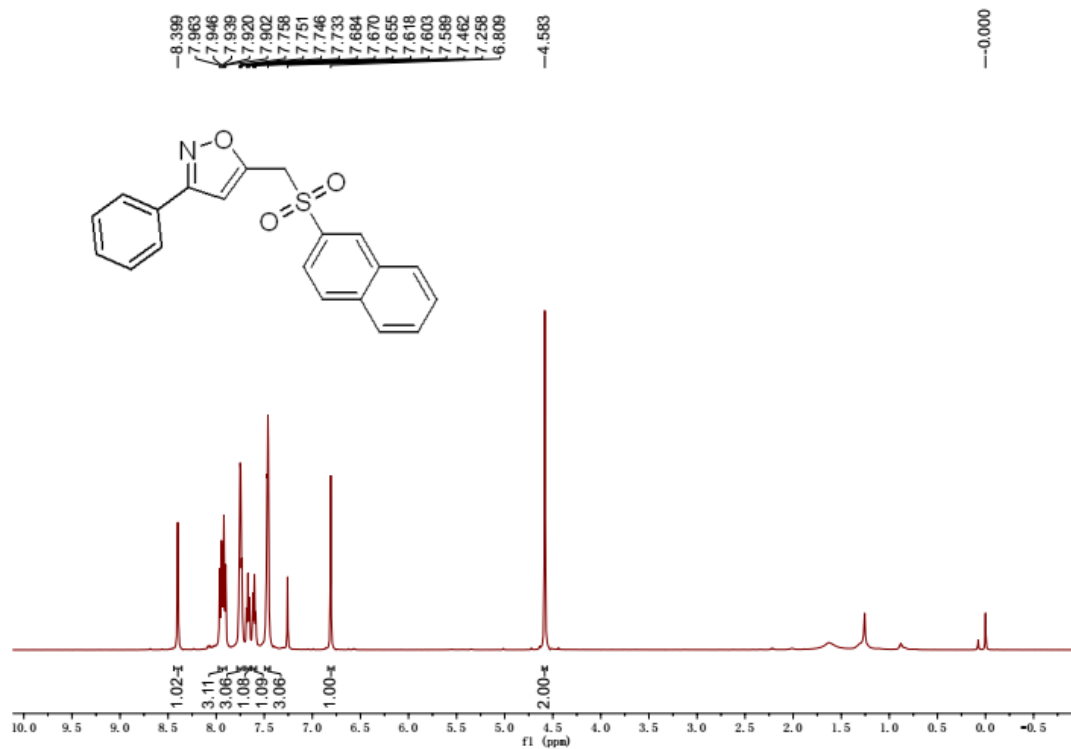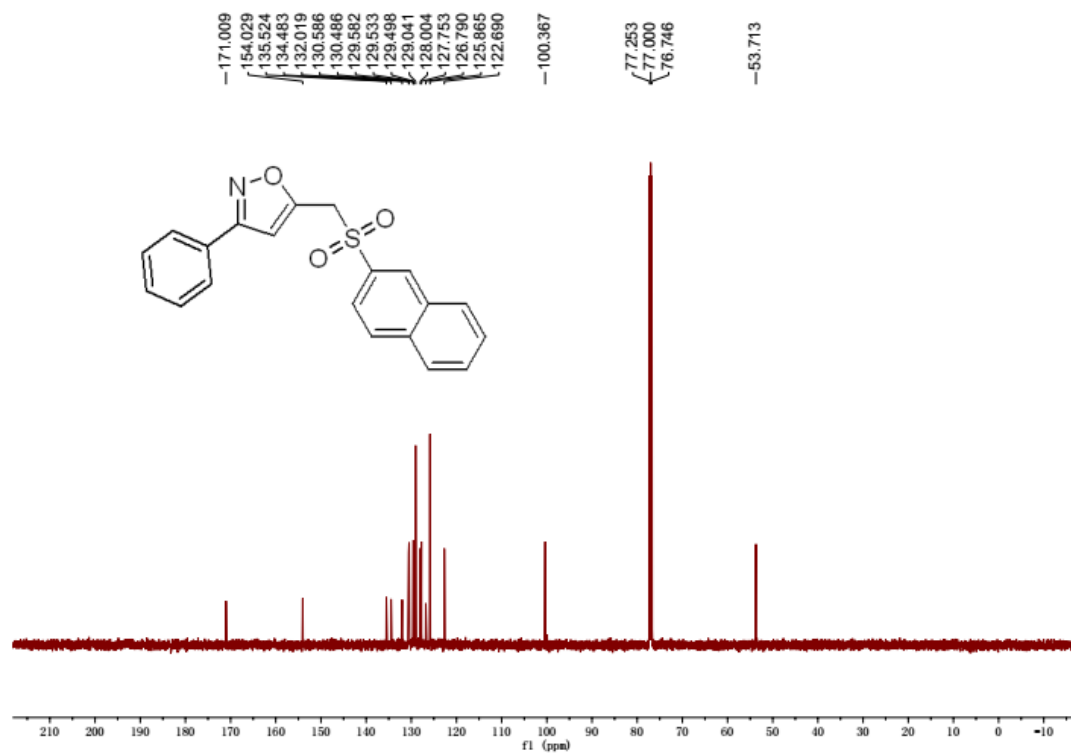

### 3-phenyl-5-((thiophen-2-ylsulfonyl)methyl)isoxazole (3am)

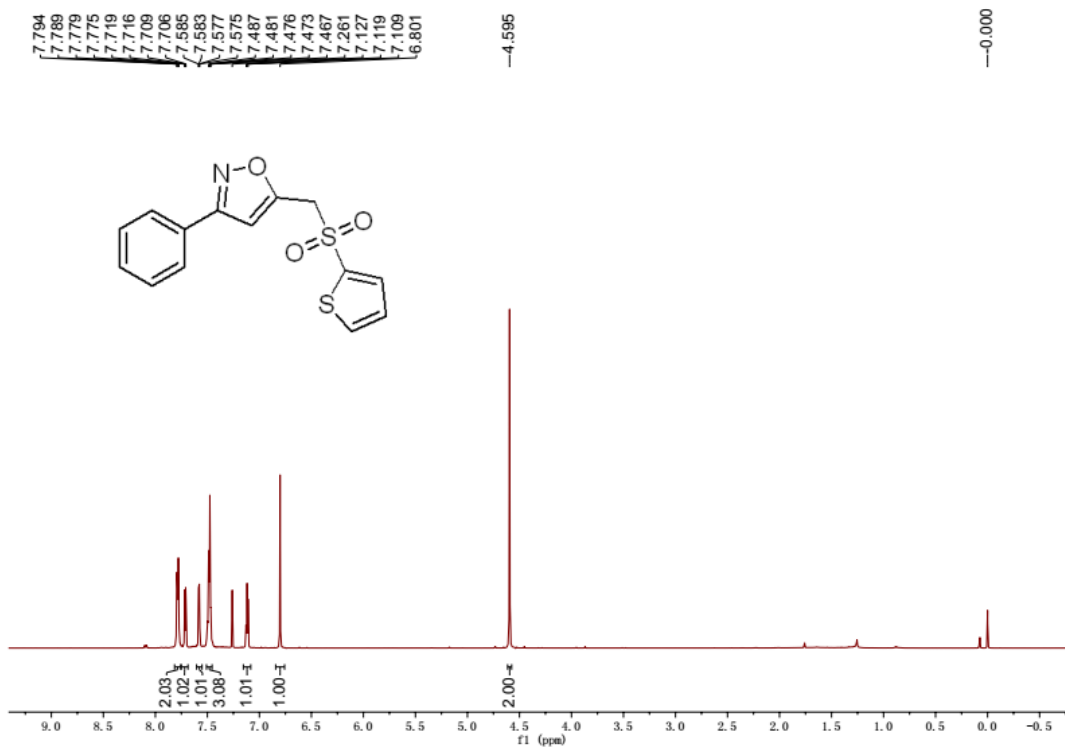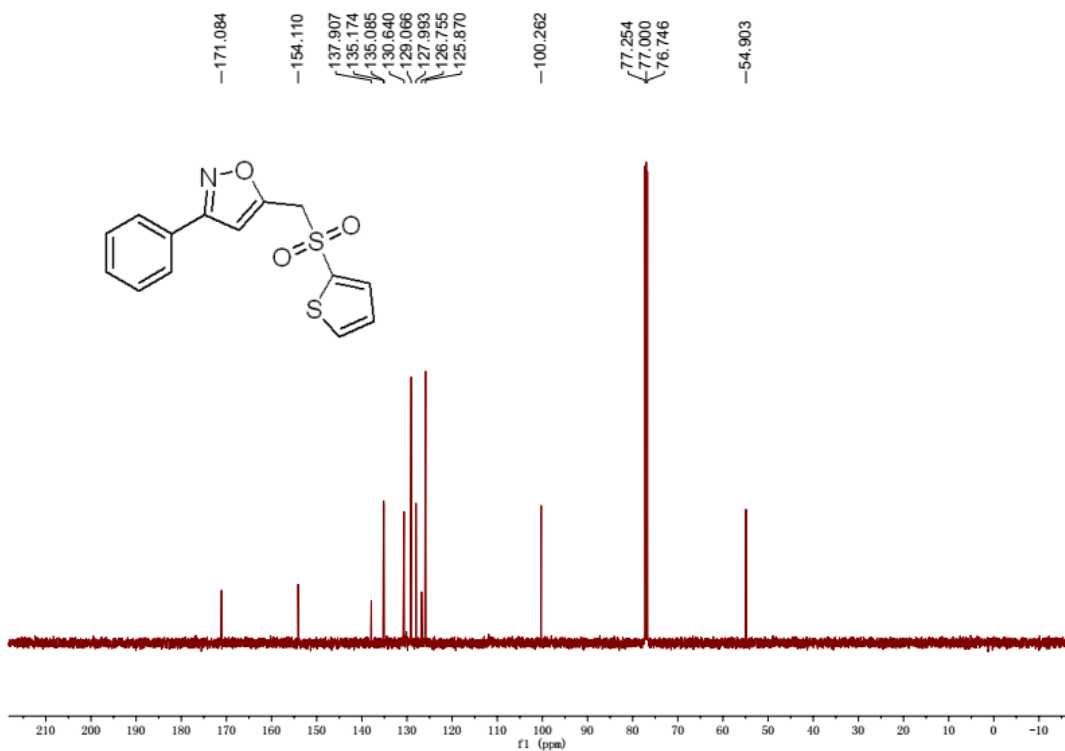

### 5-((methylsulfonyl)methyl)-3-phenylisoxazole (3an)

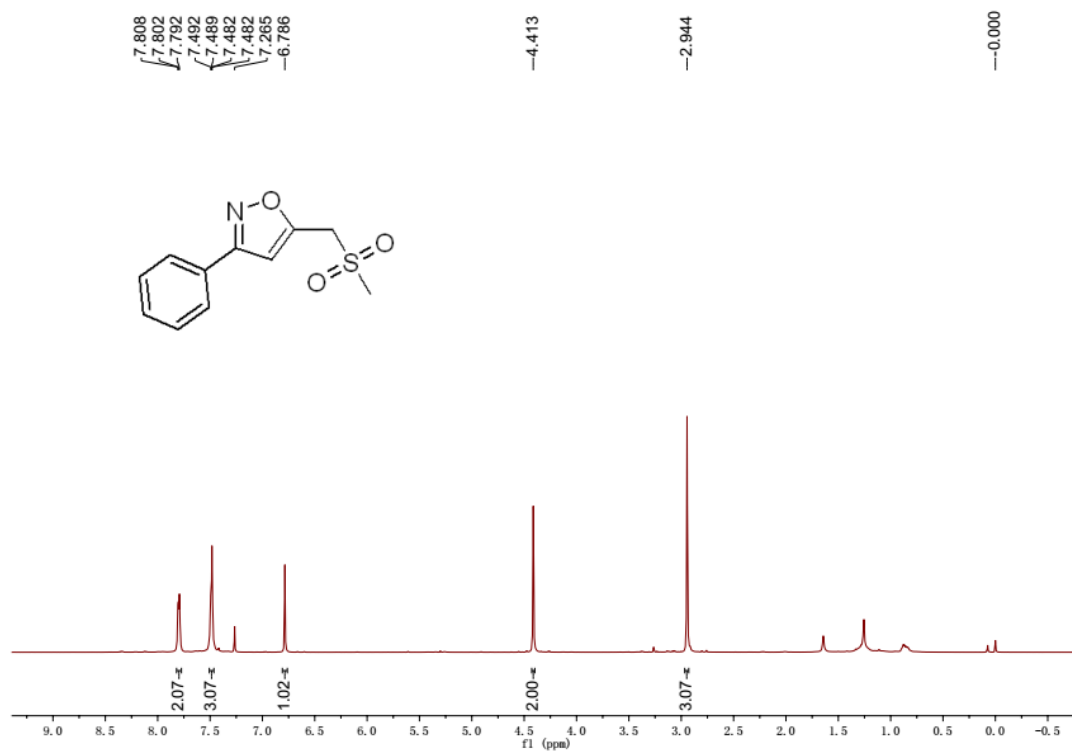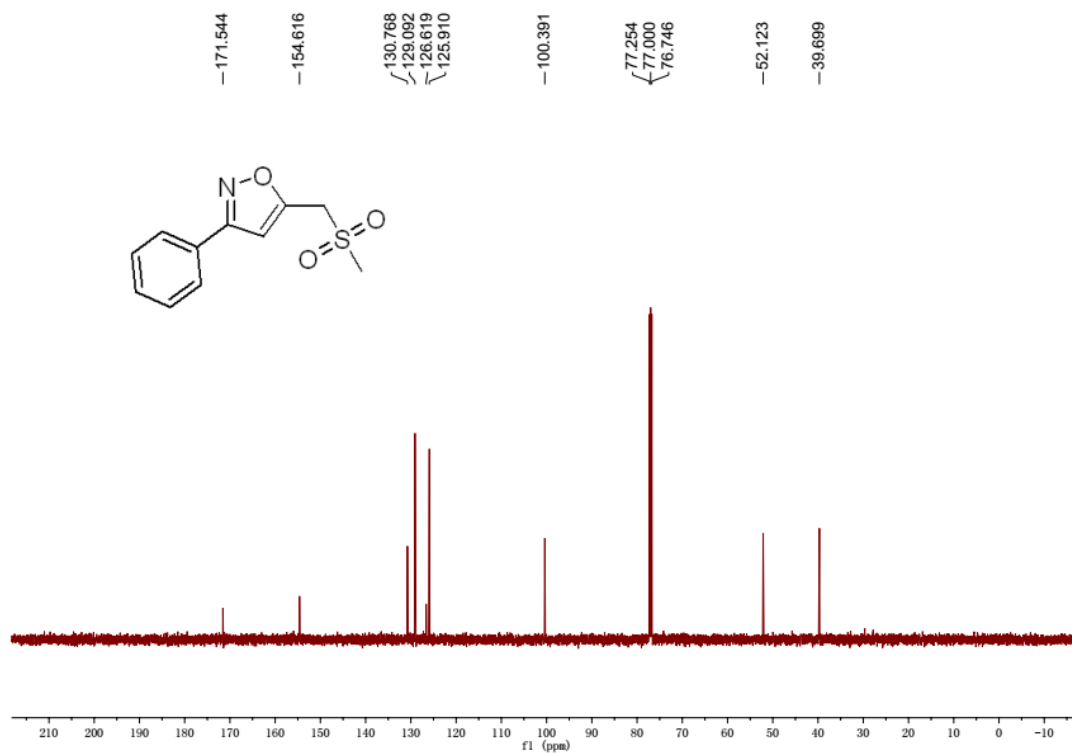

### 5-((cyclopropylsulfonyl)methyl)-3-phenylisoxazole (3ao)

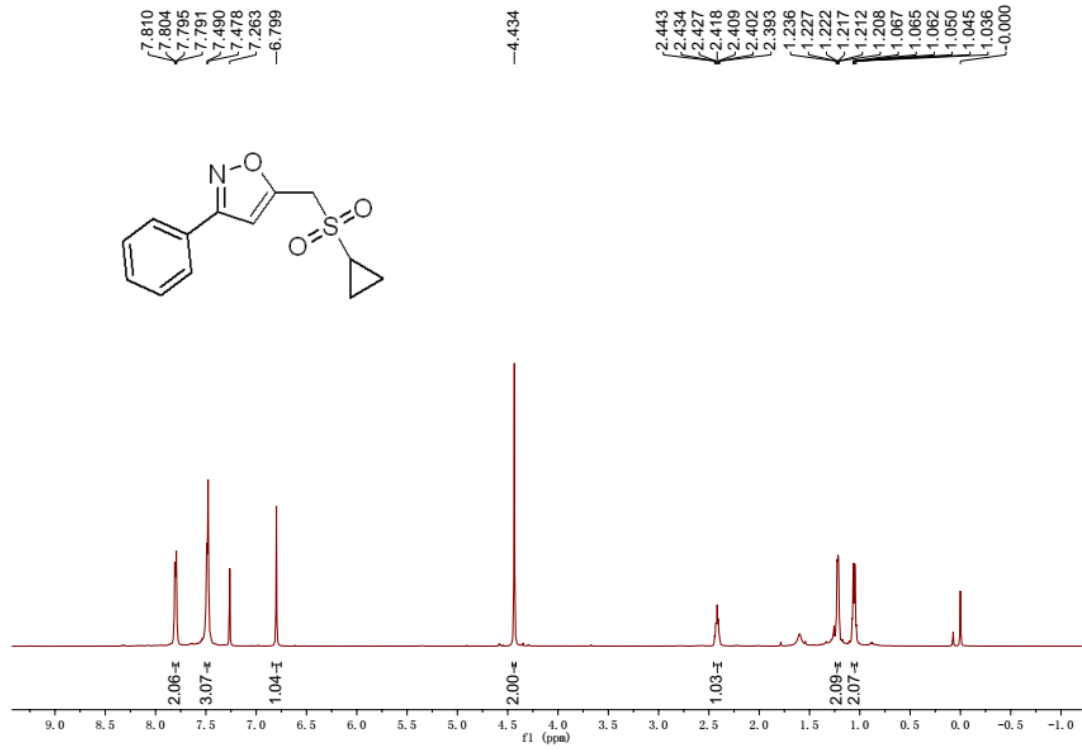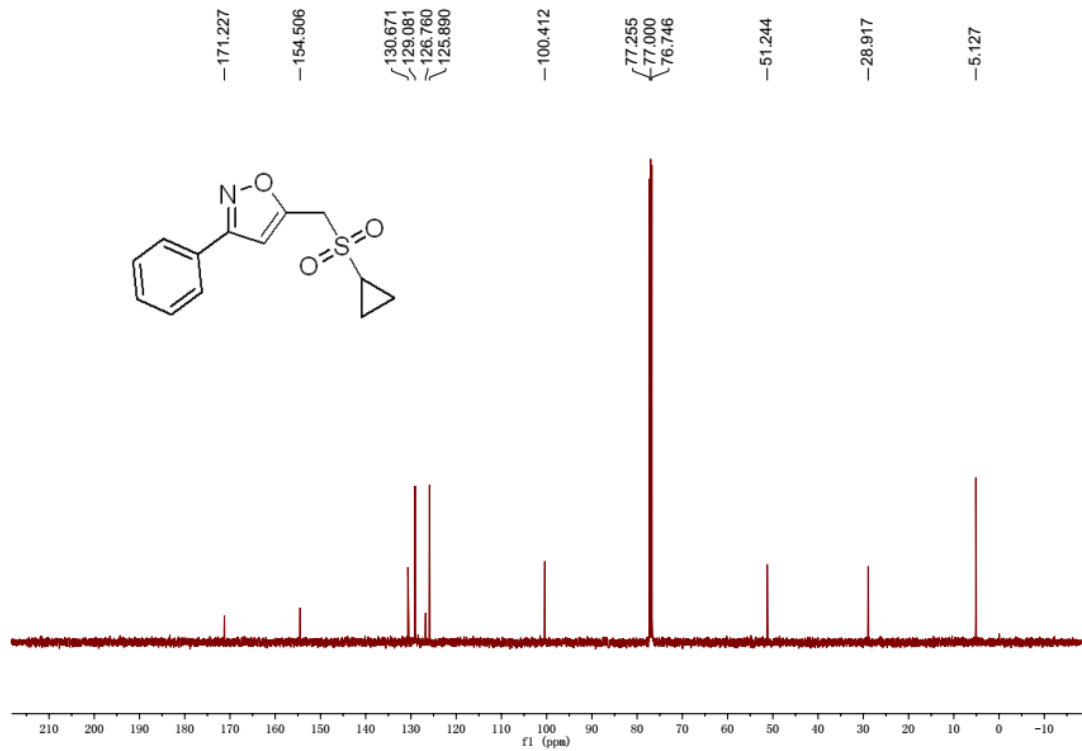

**methyl 3-(((3-phenylisoxazol-5-yl)methyl)sulfonyl)propanoate (3ap)**

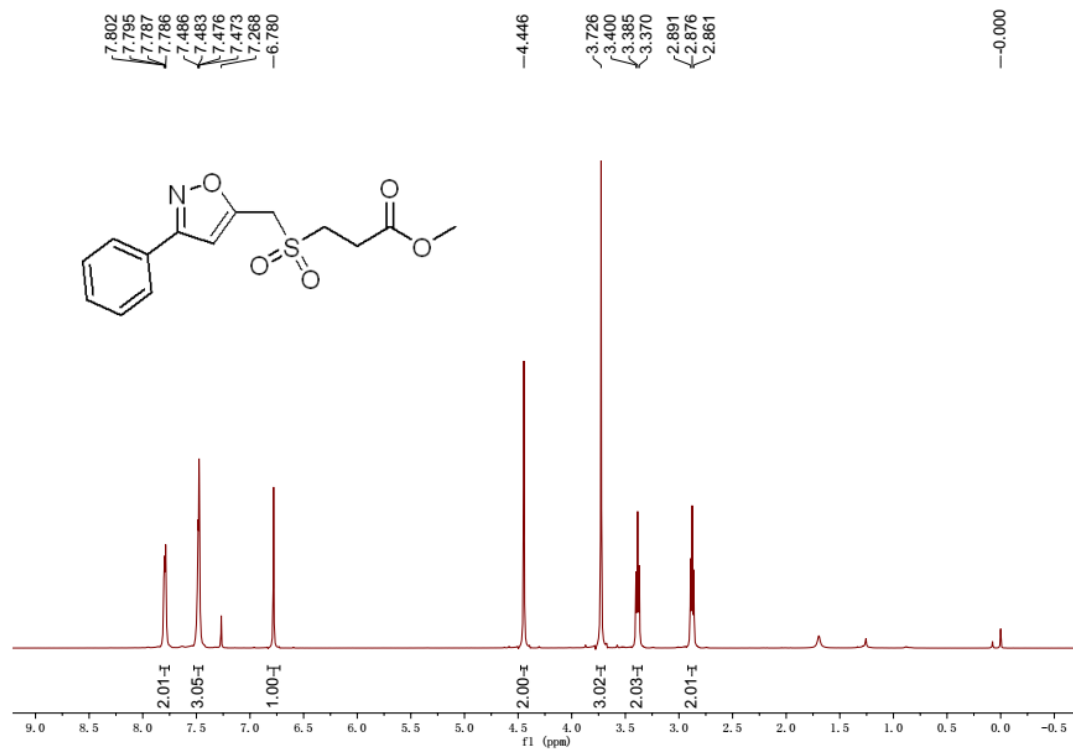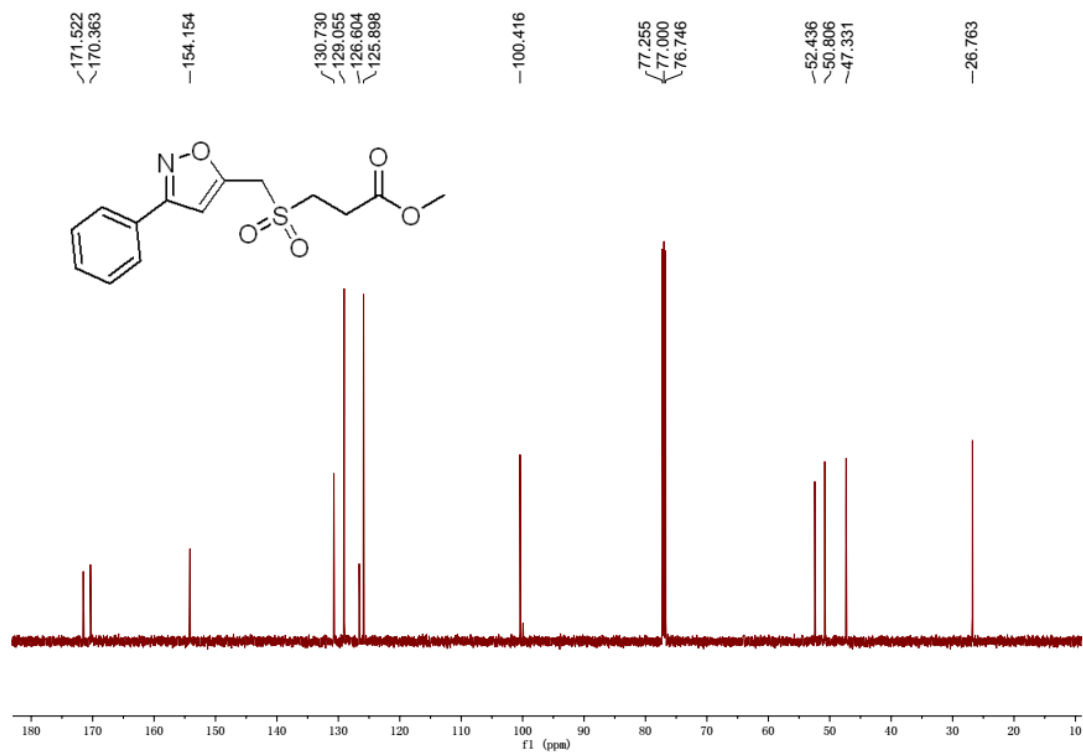

### 2,6-Di-*tert*-butyl-4-(tosylmethyl)phenol (4)

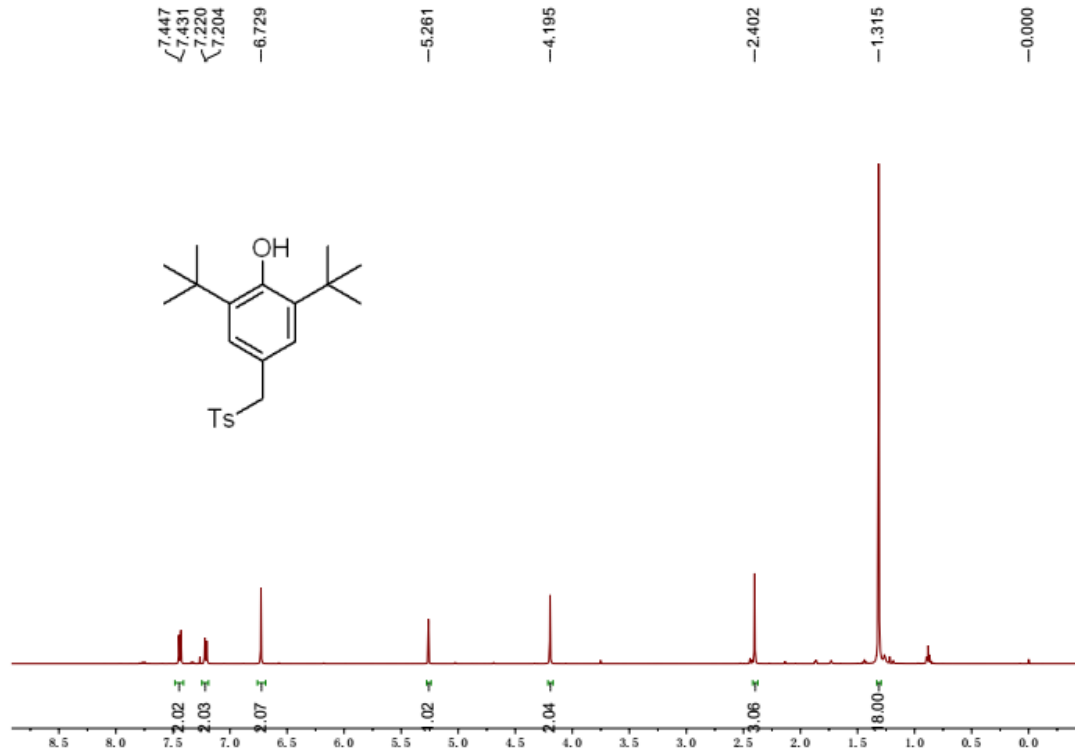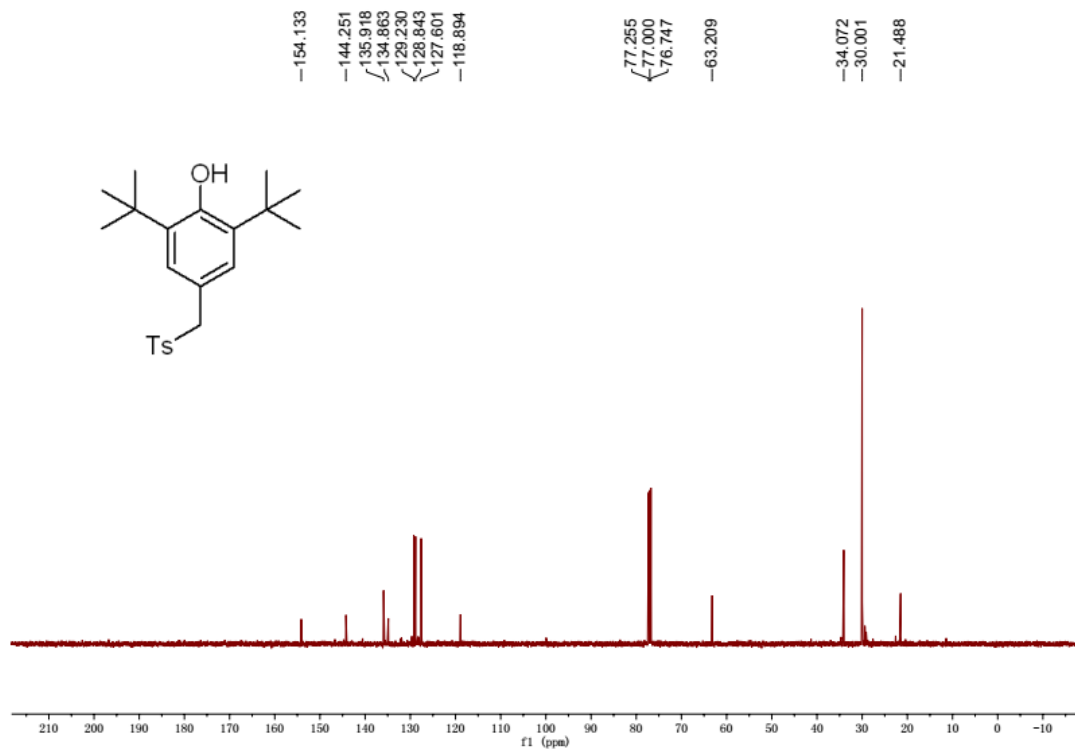



## **(D) Reference**

- (1) X. He, X. Yue, L. Zhang, S. Wu, M. Hu and J.-H. Li, *Chem. Commun.*, 2019, **55**, 3517.
